# Supplementary material for: Metabolic Reprogramming of Mouse Bone Marrow Derived Macrophages Following Erythrophagocytosis
Source: Front Physiol. 2020 Apr 30;11:396. doi: 10.3389/fphys.2020.00396 (PMC7204509; doi:10.3389/fphys.2020.00396)
Supplement: Supplementary file 3 [file Table_2.XLSX]

## Sheet: Untargeted
	Area: 105-08+.raw (F1)	Area: 105-08and105-09+.raw (F2)	Area: 105-09+.raw (F3)	Area: 105-10+.raw (F4)	Area: 105-11+.raw (F5)	Area: 105-12+.raw (F6)
	01-Pre	01-Pre	01-Pre	02-Post	02-Post	02-Post
2-Thiouracil	4.62169e+06	5.32022e+06	4.78067e+06	5.58888e+06	5.75686e+06	4.70993e+06
C49 H78 N2 O12	3.39382e+06	4.21624e+06	2.84846e+06	2.88854e+06	2.62206e+06	3.01607e+06
Positive_104.03529_6.345	3.35232e+06	3.61032e+06	3.4541e+06	4.8099e+06	3.15748e+06	3.1099e+06
6-Methyl-2-thiouracil	3.26845e+06	4.61052e+06	4.97907e+06	5.26185e+06	5.95906e+06	3.74141e+06
Trifluoroacetic acid	3.07423e+06	3.33267e+06	1.1326e+06	2.20512e+06	1.02141e+06	3.6504e+06
NPYR	3.00928e+06	1.2263e+06	2.74362e+06	792568	1.2811e+06	1.01481e+06
Palmitic acid	2.7585e+06	1.87243e+06	2.5771e+06	2.02011e+06	2.79776e+06	2.85383e+06
Positive_138.11148_0.884	2.50317e+06	2.58671e+06	2.28812e+06	1.63539e+06	1.91553e+06	1.81648e+06
C44 H74 N2 O9	2.20024e+06	3.27686e+06	2.30708e+06	2.8209e+06	983114	3.6931e+06
C45 H73 O P	2.20024e+06	3.27686e+06	2.30708e+06	2.8209e+06	983114	3.6931e+06
Phosphoric acid	2.04536e+06	2.0135e+06	2.01391e+06	2.41902e+06	2.11964e+06	2.042e+06
C4 H4 O7 P2	1.96152e+06	2.17262e+06	2.01468e+06	1.67561e+06	1.74449e+06	1.75029e+06
C16 H28 N6 O S	1.95716e+06	1.12643e+06	1.04562e+06	810565	922800	1.35698e+06
Ethephon	1.68774e+06	817750	967152	1.76194e+06	878197	1.02533e+06
HEPES	1.58602e+06	1.47221e+06	1.24101e+06	942821	1.13577e+06	1.20071e+06
Positive_121.07721_0.878	1.5628e+06	1.36032e+06	1.6787e+06	907977	940234	1.23639e+06
5-Nitro-2-thiophenecarbonitrile	1.54828e+06	1.35227e+06	103884	2.11906e+06	209552	1.7195e+06
C6 H12 N8 O2 S	1.50401e+06	1.5564e+06	751709	837864	867774	926306
Positive_138.11147_1.127	1.35999e+06	1.14824e+06	986193	878320	633827	1.22378e+06
C20 H41 P	1.30708e+06	1.17344e+06	1.38203e+06	1.16813e+06	1.00893e+06	1.31293e+06
Oleic acid	1.27672e+06	1.09238e+06	1.08317e+06	905224	1.07488e+06	1.37525e+06
Positive_163.9226_0.9	1.25417e+06	1.57019e+06	1.37528e+06	1.83219e+06	2.04524e+06	1.39175e+06
Creatine	1.24196e+06	1.36275e+06	1.36986e+06	1.20455e+06	970819	933278
C6 H2 N2 O3 S	1.17624e+06	2.30837e+06	1.80094e+06	1.18289e+06	2.14185e+06	1.08677e+06
Positive_141.94064_0.921	1.10146e+06	1.72626e+06	2.00908e+06	1.76636e+06	1.68827e+06	1.38345e+06
Positive_138.1115_1.274	1.08126e+06	1.10717e+06	1.26516e+06	2.03058e+06	1.65196e+06	1.58901e+06
Negative_91.03328_0.742	1.02828e+06	924056	787328	787482	740824	943798
Negative_115.94183_6.408	925326	528877	1.1214e+06	615757	682710	537530
Chlorotrifluoromethane	911070	976680	957140	991673	1.10711e+06	1.13761e+06
1-Amino-2,6-dimethylpyridinium	855574	878132	738014	578370	616944	684667
C5 H13 N5 O2	850750	723311	624259	553069	522848	660008
Positive_253.81593_0.864	836386	1.32803e+06	1.42777e+06	978215	1.41433e+06	1.07242e+06
Positive_157.95659_0.827	834313	855416	798086	708574	703952	713052
C3 H12 N3 O2 P	823344	495048	465744	470698	313369	477498
C6 H3 O3 P	805821	1.46801e+06	1.66217e+06	325951	1.43932e+06	866883
Dopexamine	795030	671081	622177	600033	562045	782723
C44 H72 N2 O9	767660	821117	688010	647179	717761	751379
C H Cl3 O P2	747349	1.23781e+06	1.4233e+06	904826	1.29699e+06	1.0048e+06
C13 H31 N4 P S	727128	590933	787871	555714	657265	711242
Methylphosphonic acid	720889	761630	720053	814482	717662	686728
2-(Bromomethyl)-1,3-butadiene	718013	299370	428733	765662	389385	444593
1,1-Difluoro-1,2-dichloroethane	716471	757377	716161	809310	712721	684227
Positive_155.06464_0.896	715267	498917	404419	118801	116139	489053
Positive_175.10594_1.981	698897	609401	942740	1.0049e+06	564099	688221
Stearic acid	674547	818492	878808	911385	1.48304e+06	914184
C17 H39 N2 P S2	639806	488799	625819	443640	479443	518515
C7 H4 Cl N3 O S	632981	323856	496431	528065	277496	694673
S-ethyl chloridothiocarbonate	632254	577167	614516	481056	529800	625790
C49 H76 N2 O12	583767	704946	533166	638132	602121	436354
C9 H14 N6 S	580468	1.09505e+06	459883	689473	397719	588595
Positive_104.03531_0.881	577958	613156	530018	127595	587137	239034
C3 H12 N3 P S	546165	907056	614417	582021	707444	395914
C51 H85 O6 P3	545487	825714	2.84846e+06	2.88854e+06	2.62206e+06	184653
Positive_157.95659_6.353	542185	607909	590452	542344	526484	600997
f 133a	534731	1.0534e+06	1.27696e+06	558138	1.60622e+06	1.01765e+06
C4 H2 O3 P2	531240	385649	309137	239349	218337	417996
C4 H3 N5 O P2	525889	947374	119359	546694	990313	754187
C10 H20 O3 P2 S	515118	440816	568210	380219	736561	501049
6-(Hydroxymethyl)-6-methyl-1,3,5,2,4-trioxadiphosphocane-2,4,7-triol 2,4-dioxide	489536	502657	278383	257827	501809	301998
Phenethylamine	487503	381286	301919	398620	375041	470118
C4 H6 N2 O8	481023	646859	422336	406745	461267	589343
C4 H Br Cl3 O P S	480761	632640	722756	569376	648980	525772
Positive_139.89603_0.866	466470	597972	661892	645903	672256	501144
Dibutyl Sulfoxide	463147	563547	521754	161100	548288	229922
Dipentyl sulfite	458688	560663	515374	223243	545809	157223
C H Cl2 N2 O2 P S	454438	576836	671499	590970	692430	479093
C48 H79 O3 P3	448440	501607	482819	431949	504129	593654
Dodecyl(2-phenylethyl)phosphinic acid	446179	327263	353927	483862	317615	446695
C5 H8 N2 O8	445947	579732	462504	508659	543986	451591
C7 H10 N4 O5 P2	441213	563676	433848	428337	751298	288100
C2 H6 N4 O3 P2	438432	466578	351975	200843	410778	300386
C5 H4 N2 O13 P2	427725	471290	400692	348093	362766	356973
C3 H3 Cl O5 P2	422037	492265	674884	462017	663045	474758
Benzoic acid	421865	386435	368909	313835	303583	386073
Positive_191.10076_0.882	419012	385758	384774	261738	265423	347308
C3 H8 N2 O6 P2 S2	409011	457256	393607	324618	351280	330736
C3 H6 N2 O5	403538	387923	354498	426030	333297	374879
C2 H6 N O4 P	403385	442034	399013	446189	315163	363770
C3 H8 N2 O2 P2	400941	623811	997793	752076	456098	657434
C5 H Cl N2 O S	386816	158462	273854	340359	132222	304621
valinol	381147	554492	400164	271436	425476	264875
(5E,8E,11E,14E)-5,8,11,14-Icosatetraenoic acid	364082	388429	388138	399981	367932	520688
2-Chloro-6-fluorobenzaldehyde	355254	478355	630463	541472	595570	484495
C7 H O5 P	354603	476341	628745	510921	557886	467112
C7 H4 O9 P2	350617	328904	388458	354851	378553	379912
C9 H3 O18 P	342967	381040	323358	277370	286227	282268
C5 H Cl N4 O2	336834	426476	479857	325347	351862	332932
Positive_104.03536_0.835	332955	281795	199109	274950	192557	239034
3-Bromopropyne	331765	210079	316473	277736	259012	356584
Isopropyl 4-methylpentyl sulfite	324737	333205	391089	270057	308409	309024
C4 H3 N4 P	324249	194002	295295	333133	169636	319747
C6 H O6 P3	318368	473868	83033.9	428025	18612.7	54767.2
1-Bromo-3-chloropropane	312219	303153	411612	440326	539811	418042
(21R,27S)-24,27,28-Trihydroxy-24-oxido-18-oxo-19,23,25-trioxa-24lambda~5~-phosphaoctacosan-21-yl (5Z,8Z,11Z,14Z)-5,8,11,14-icosatetraenoate	312129	424096	493222	203545	497805	504791
C H2 Br Cl4 N2 O P3	309028	456342	441873	372344	410406	314278
C H2 Cl O5 P3	307057	456854	495320	508845	525941	359242
C H3 Cl2 O5 P3	294895	415218	382902	443566	476177	314288
C8 H12 N4 O5 P2	294542	388912	491924	606032	433113	191430
(21R,27S)-24,27,28-Trihydroxy-24-oxido-18-oxo-19,23,25-trioxa-24lambda~5~-phosphaoctacosan-21-yl (4Z,7Z,10Z,13Z,16Z,19Z)-4,7,10,13,16,19-docosahexaenoate	290874	147061	312625	210723	329945	222325
(19R,25S)-22,25,26-Trihydroxy-22-oxido-16-oxo-17,21,23-trioxa-22lambda~5~-phosphahexacosan-19-yl (11Z)-11-octadecenoate	290400	371481	232678	276702	228902	352828
Positive_154.11948_0.812	287980	269449	251322	166122	163977	210315
Positive_138.98047_6.479	283471	356110	396440	262396	291862	254836
Negative_105.95943_0.764	283056	325779	327959	309014	364780	382834
Negative_119.92972_6.338	279883	231672	191639	275669	187812	243909
C9 H14 O11 P2	279769	311134	306230	189116	197335	182950
L-(+)-Leucine	276402	273674	234559	1.86477e+06	2.01438e+06	1.54096e+06
Positive_191.10074_1.239	272186	178557	175119	216524	180366	223493
5-(3,5-Dimethyl-1H-pyrazol-1-yl)-2H-tetrazole	270825	417855	292306	439606	623859	601449
C2 H Br Cl3 N2 P	269695	345634	391982	460756	463125	384568
C49 H85 O6 P3	261567	364293	168404	101271	55522.6	304200
C4 H7 O4 P S	258464	131895	86580.6	54600	59967.2	140489
C49 H80 N2 O4 S2	258038	138679	169409	285795	120702	209828
C12 H32 N7 O P S	257202	102965	124164	94942.1	111667	174749
C7 H6 N5 O P	248950	265589	397545	252956	213691	232106
C5 H4 N10 O5 P2	243884	149464	106376	83513.1	210185	144782
C7 H10 N4 O14	240715	297449	365495	266945	282210	163389
C8 H6 N O3 P	238325	446028	767907	266275	431533	218989
C44 H77 O3 P3	235978	279567	248528	235699	123748	223919
1-monomyristin	235639	28840.9	151894	108188	148553	237825
9E,12E-octadecadienoic acid	232962	274732	245273	280204	317333	289443
Positive_155.06463_1.093	225802	188711	193965	205971	116139	216468
C2 H3 Br2 Cl3 N2 O P2 S	223372	331217	319892	274253	287644	212466
Octylamine	222143	256507	243582	223232	238810	213527
C8 H9 N2 O15 P3 S	221694	243749	207185	178820	186295	184681
Negative_79.96451_0.788	219041	151136	176740	29943.4	25759.2	174060
C9 H21 N2 P3 S	218263	224668	156282	190624	158782	171314
pyrimidinethione	214723	230581	297180	224847	235358	189346
DL-Glutamic acid	214411	191282	163319	315411	283974	307463
C4 H6 N3 O2 P	211341	215693	160218	146447	168073	192683
C5 H6 N4 O5 P2	211303	383569	149495	254385	121977	451925
C8 H21 N2 P S2	210132	217466	200207	273625	167551	181593
(7Z,21R,27S)-24,27,28-Trihydroxy-24-oxido-18-oxo-19,23,25-trioxa-24lambda~5~-phosphaoctacos-7-en-21-yl (4Z,7Z,10Z,13Z,16Z,19Z)-4,7,10,13,16,19-docosahexaenoate	208973	257935	257796	206700	267548	287223
C9 H6 N O4 P	207140	497811	467046	273488	672034	253095
C6 H18 N6 O S	206770	51407.1	26613.8	82395.8	29901	157290
C10 H22 O5 S2	204670	242276	150740	209008	244164	359071
C40 H85 N2 O7 P S2	202175	471169	335726	285869	272651	6425.4
C7 H10 O3 P2	201859	168186	256457	96439.6	231535	105179
C47 H78 N2 O12	197825	216026	168404	204764	178862	7889.5
C39 H84 N4 O12 P2	197825	216026	3764.47	204764	2419.59	1061.85
C5 H O6 P	196494	198873	178438	165603	180647	215974
Retinyl acetate	193188	186376	189754	213074	245806	259237
C7 H4 Cl N5 O2	192298	271650	299181	184620	260377	187838
C4 H2 N4 O7 S	191838	95619.7	71934.1	25341.2	42289	268738
3,5-Dimethylpyrazole	189695	159410	175043	182648	157230	131996
C47 H74 N2 O12	187343	222894	94031.2	214098	246512	242205
C6 H5 Cl N2 O8	185640	233788	193921	224606	254372	228267
C20 H33 O P	183892	124694	144579	193595	131081	199241
1,2-DIBROMOCYCLOHEXANE	183508	232975	236500	194997	254938	189742
Methylphosphonofluoridic acid	181916	193447	182267	212274	181070	173646
(2R)-2,3-Dihydroxy-1-propanesulfonic acid	181566	234705	357557	194443	306258	204638
Negative_124.90765_6.3	179230	179018	141611	169650	181783	159398
C9 H20 O3 S2	178928	43369.7	63654.5	175563	92475.4	86146.8
C7 H3 N8 O17 P S2	178594	191071	164617	134031	150460	143990
C48 H77 N3 P2	175073	334931	93435.3	95959.7	173502	222280
Nicotinamide	174677	262248	66476.4	106699	137200	105880
C3 H2 N6	172467	144871	130639	193179	119360	158807
C5 H12 N2 O4	170856	140695	111391	98075.8	60949.3	66188.9
Tris(2-butoxyethyl) phosphate	168962	153180	156272	174719	158833	177089
C2 H6 Cl N6 P	168770	209465	220678	196132	188590	147911
Negative_119.97511_0.764	166502	250302	244882	47582.7	348939	204780
C4 H5 Cl N4 O12	163442	207229	197721	156336	210584	174559
C46 H75 N3 P2	162965	291152	303895	49077.2	227480	205594
C6 H11 Cl N4 O7 S2	162631	194810	231960	198404	144140	124867
C10 H4 Cl2 O2 S	161805	151631	185225	75507.3	131007	95590.8
C3 H Cl2 O5 P3	161384	190529	332376	219337	306899	165506
Negative_195.91188_6.276	161370	156905	133333	136827	165028	191653
C3 H Cl O4 S2	159496	199844	208239	222108	215824	141012
C38 H80 N3 O9 P	159404	234162	207183	64016.9	191714	3510.28
L-Proline	159063	153427	144732	655112	752101	603582
4,6-Bis(diethylamino)-1,3,5-triazin-2(5H)-one	153345	166816	143752	140338	152246	153290
1,8-Diazabicyclo[5.4.0]undec-7-ene	152792	162294	153369	140308	148301	160163
C H4 N2 O5 S	152587	161407	269520	134034	141233	125324
C2 H4 Cl N6 P3	152483	50092.7	97154.8	41371.1	59395	193210
C10 H2 Cl2 O S	152017	182630	176663	67198.5	122568	64003.2
gamma-Glutamyl-3-[(1E)-1-propen-1-ylsulfinyl]alanine	151419	148929	130805	105531	123920	185072
Negative_153.88946_0.737	150642	130035	145794	251950	238923	198853
Positive_633.86742_0.822	148990	157669	136103	109852	119564	118967
Positive_191.10078_1.112	148931	204520	184937	167041	170548	168472
Positive_120.96728_0.898	146794	180028	200380	148088	216193	161310
C47 H80 N2 O4 S2	146523	91338	36793.4	41236.4	82270	423084
Positive_99.05615_6.083	145141	7527.1	86519.4	125417	33915	190248
C46 H81 O5 P S	143592	115978	68459.6	15737.3	27425	146737
C45 H80 N2 O4 S2	143592	115978	185137	150849	193637	146737
Decanoic acid	141815	145088	138075	112127	112902	138673
C20 H40 N O3 P	141258	116114	114395	128394	132092	137257
C6 H12 O18 P2 S2	139946	153444	141672	136765	138049	155066
C4 H5 Cl N4 O3 P2	139098	186399	199778	91858.8	175102	250990
Phosphonic acid	138609	148641	133331	151980	146702	46537.8
C3 H Br2 Cl4 N4 P S2	138054	210369	202873	172411	176971	126297
C2 H5 Cl2 O3 P S5	137347	242958	171426	157356	131418	143937
C6 H7 Cl S3	136953	124574	113751	108397	121644	162778
C48 H86 N O P3	136003	146714	227677	230206	69952.2	135805
MDMA	135037	145337	120708	88187	145106	115902
Ethyl eicosapentaenoic acid	134735	134993	136847	122739	144819	176851
Positive_147.92791_0.846	133972	175235	183964	197192	224777	172708
C4 H6 N3 O4 P S	133009	167664	127765	83744.3	94718.9	165721
C5 H O P3 S	132954	252635	316443	275104	276660	185625
C3 H7 O5 P S	132925	182749	199123	130777	154163	131553
Positive_171.05956_1.001	131603	151929	128363	128387	173056	84100.1
C8 H3 Cl2 O P	129716	132448	124408	92093.3	113144	148444
Negative_795.54798_4.63	127932	165134	169800	116784	176560	112783
2-Dodecylbenzenesulfonic acid	127258	116435	101342	99743.6	123435	139644
Erucic amide	126881	485766	127826	135876	74409.7	301381
4-Undecylbenzenesulfonic acid	126499	107785	99065.4	102328	114233	135689
C2 H3 Cl2 N2 O2 P S4	125872	147898	201255	239288	225098	135158
C5 H8 N3 O2 P	125775	139882	159702	182683	198934	115515
C3 H Cl2 N2 O P S	125692	138241	150903	165604	162897	158811
C H2 N3 O6 P	125666	81019.5	80361	54997.2	175989	60740.5
C4 H2 O S	125335	46369.1	122644	115394	100901	106944
Negative_119.93824_6.006	125188	73340.7	44924.6	34150.6	31123.1	4128.32
C11 H27 N2 O P S	125018	120701	100630	1.16612e+06	96528.1	125187
C12 H5 Cl4 P	123368	183905	137142	130332	135886	162825
C11 H24 N2 O2 S3	122948	94595.1	109290	90086.2	144891	68868.8
C6 H15 Cl N8 P2	122770	129960	134867	152183	157758	148764
Pyrophosphoric Acid	121799	148509	170512	155196	172327	145354
Positive_701.85448_0.822	120796	126552	108609	86037.3	94674.8	94777
C2 H Br O S	119845	175564	203263	218026	169757	158457
L-(+)-Valine	119794	131896	110423	747469	828012	759255
Malic Acid	119792	114974	150211	232758	240256	307438
C10 H19 N2 O8 P3	119283	177188	241279	309135	344331	83483
C2 H N3 O4	118975	126005	135576	25904.7	139418	132302
C2 H2 N2 O4 S2	118082	112884	128653	93269.1	103259	211023
C46 H82 N O3 P3	117984	93903.5	166815	187731	211878	90537.1
C3 H2 N4 O P2	117085	50883.1	46805.5	111458	40447.8	82095.3
C4 H N4 O P	116516	29120.5	75968.4	142523	74729.2	95186
C49 H80 N2 O12	115615	12134.5	68349.4	24170	40153	28563.8
DL-Glutamine	115271	6289.92	5206.01	178352	164365	213303
C3 H N2 P	114611	148626	263345	116698	78793.5	133947
C4 H10 Cl P3	114389	115480	127956	153896	162239	138476
C3 H5 Cl N3 P	113990	144222	152322	122541	174519	162938
C H Br Cl2 O3	113844	142349	147324	227333	182085	152099
C3 H5 Cl4 O P3 S	111956	177909	189259	156368	198815	129732
C8 H16 N2 O15 P2	111561	106281	98357	83419.1	102062	71594.2
C20 H33 N2 O P S2	110923	103364	72062.3	66174.2	105267	127277
C5 H13 Cl O7 P2	110773	163942	161269	269097	278533	98615.7
C2 H4 N6 O	110564	102246	95211.7	88823.5	77579.7	86903.2
C6 H5 N6 O2 P	107320	62700.5	117671	100497	49729	89611.5
L-(+)-Aspartic acid	106093	99533	100946	327649	314552	381737
Triethylphosphate	106039	172007	150526	156199	176669	230369
N-Hydroxysuccinimide	104302	113009	144289	129875	152218	150565
1-Palmitoyl-2-linoleoyl-sn-glycero-phosphatidylcholine	102323	121229	156250	11070.3	101778	71576.4
2,3-Dicyanopyrazine	102040	387094	309324	122631	282369	232044
C6 H11 N2 O8 P3	101249	92399.1	102871	28636.6	43049.2	89500.1
C19 H41 N2 O4 P	100792	84741.3	80228.4	103248	68968.9	98275.5
C11 H10 N10 O7 P2	100228	130308	152746	169703	133433	84162.1
C14 H5 N2 O17 P3	98762.2	106108	93974	87700.3	91409.7	101000
Positive_81.01976_0.838	98570.2	88769	83442.1	70990.3	92216.9	97338.3
Palmitelaidic acid	98459.1	157014	121484	168708	152994	185602
N-Lauryldiethanolamine	98233.7	84513.9	90845.9	108058	85823.9	101058
C7 H19 N3 O5 S	98036.4	84344.2	70854	99268.4	106687	127921
C11 H21 N4 O3 P S	97261.3	116150	122824	135764	128495	93680.5
C35 H79 N5 O7 P2	97194.1	55371.1	83990.2	53244.1	90900.4	71957.5
C48 H84 N P3	97026.4	12690.6	54816.8	36456.4	3008.28	62330.4
2-Mercaptobenzothiazole	96931.8	80756.5	74291.3	32138	33996.7	47816.8
C18 H37 N2 O P	96425.1	79624.6	64535.4	46075.7	64285.5	118808
C38 H70 N2 S	96408.7	61128.4	199160	218385	120193	202731
(1alpha,5xi,6alpha,9xi,10alpha,13xi,15alpha,16beta)-13,15-Dihydroxy-1,6,16-trimethoxy-4-(methoxymethyl)-20-methyl-8-[(9E,12E)-9,12-octadecadienoyloxy]aconitan-14-yl benzoate	96141.7	39187	26076.7	42040.9	13266	70250.5
C4 H4 N4 O5 P2	94648.2	52197.5	71934.1	48886.3	38913.2	134285
C48 H79 N3 O6	94611.7	7163	91198.6	129008	6780.43	116126
C H Cl N2 O6	94175.5	106305	65219	76202.7	102534	146101
C H Br Cl3 N6 O P3 S2	92637.8	117801	103579	149338	62715.3	92476.7
spermidine	92329	111847	16406	317321	248015	48690.4
C2 H2 Br Cl N2 O2 S2	92237	173008	220323	209465	243061	189787
C7 H9 Cl N6 O9 P2	92071.7	88397.5	109579	98948.8	70870.9	59636
C5 H10 Cl2 N10 O4 S	92045.7	133605	95669.4	68076.2	73013	75732.5
C6 H12 N6 O	91637.3	119503	95592.5	106566	87595.9	139973
5-Methylcytosine	90487.1	44877.9	30698.8	9998.79	93360.3	22506.2
C3 H2 Br2 Cl2 N2 S	89809.9	113680	128757	148056	155210	128705
2-Amino-6-nitrobenzothiazole	89762.6	156541	142217	102366	247859	114430
C39 H79 Cl N5 O8 P	89306.1	89484	43675.6	52208.2	54519.9	27214.5
C H3 Cl O11 P2 S	89191.4	127495	147270	123805	189879	129377
Citric acid	88980	99123.6	110665	129654	140001	178618
C38 H78 N7 O6 P	88246.5	211898	325204	394753	106952	85125.1
Dodecyl p-toluenesulfonate	87687.6	80670.5	67191.5	68350.9	77063.6	97766.9
C40 H78 N7 O6 P	87584.9	163976	151150	42084.8	104270	108737
C4 H4 Cl3 O3 P S5	87107.8	91395.5	142059	110278	64678	45002.2
Positive_769.8414_0.825	86449.2	89046.1	75592.5	62953.3	67549.3	67450.1
C7 H13 N5 O7	86391.2	34713.8	41862.7	36825.5	126754	42475.8
C40 H72 O8 S	86183.7	82794.9	74056	64883	65562.2	75530.8
C5 H10 N2 O6 S4	86134.4	141848	87884.9	85975.4	67028.3	110376
C4 H9 N O5 P2	85548.1	39001.8	52837.2	71323.8	31208.5	39237.9
C6 H14 N4 O4	85401.3	85073	74260.3	36145.8	46110.3	62020.1
(7E,10E,13E,16E)-7,10,13,16-Docosatetraenoic acid	85201.6	78359.2	112317	91599	86266.6	133922
4-[(tert-butoxycarbonyl)amino]butanoic acid	85109.4	125692	81063.6	107420	99962	129142
C12 H3 Cl O S3	84762.4	87689.4	87405.5	123242	83532.5	87610.7
4-Nonanoylmorpholine	84367.2	101423	140670	3.26516e+06	3.2174e+06	1.11012e+06
C47 H76 N2 O12	84034.5	100053	68623.7	137528	124939	117688
Triethyl orthoacetate	84008.9	90283.4	193587	322373	103718	82436.6
C4 H Cl N6 O2	83636.9	114544	137041	160118	189149	92679.6
C46 H84 N O P3	83623	33522.9	38046.6	73704.9	19222.4	8927.07
C9 H23 N3 O3 P2 S2	83387.9	17818.2	33275.1	17238.8	18375.5	14689.4
C10 H24 N O4 P3 S	83387.9	101089	83126.2	91366.8	85669.2	40966.2
Positive_140.95125_6.475	83255	119638	115746	41057.6	107125	63667.2
C8 H7 Cl N3 O P	83230.7	116197	101124	71084.5	93964.3	72756.9
C4 H3 N4 O2 P S4	82756.7	84770	72720.1	57212.3	92658.9	108639
C6 H15 Cl N2 O8 P2 S2	81829.9	45319.7	35350.6	54322.8	62088.1	101700
C7 H2 N2 S4	80916	40515.5	38894.6	58761.7	35526.3	86498.9
Taurine	80899.8	68520.9	70911	70722.7	62572.1	65469.9
C6 H9 Cl N4 O12	80688.6	114983	113048	144105	188388	75969.1
C42 H85 Cl N5 O P3	80470.7	41998.1	80323	45423.2	76834.8	62790.1
C H2 Br2 Cl4 N4 O3 S4	80150.4	122009	115362	100923	105892	79680.9
C38 H76 O3 S	80073.2	96418.6	87124.3	74561.4	36908.1	106801
C H Cl2 N6 P S	79718.2	82471.4	77118.5	80501.9	100206	98037.7
C2 H3 Cl2 N6 P S	79649.2	101656	114994	152133	145808	111101
octylphenol	79604.3	71374.4	88658	90116.8	90949.1	80622.3
C6 H6 Cl N4 O P S3	79309.8	89035.6	97747.1	80549.2	129761	113213
L-Pyroglutamic acid	77567.7	73913.8	49148.7	113413	240177	135614
C H4 Cl N3 O S	77359.5	86877.1	97854.9	83840.9	89070.9	72720.1
C3 H5 O5 P S4	76882.4	79136.8	68432.5	51376.4	87406.7	102190
C2 H2 Br Cl2 P S2	76513	91042.5	91719.2	71783.5	90409.9	73234
C10 H23 N4 O P	76407	71975.8	69438.9	75925.5	66791.8	78730.5
Pentadecanoic acid	76234.9	77864.9	74589.2	71330.1	67713.5	89030.9
Positive_88.06191_6.338	76098.2	64092.7	108736	90000.4	59173.4	91778.7
eicosa-8,11,14-trienoic acid	75938.5	76772.4	78943.6	66957.5	71202.5	94272.6
C H3 Cl4 N2 O4 P S3	75877	100030	137901	138569	137922	83809.5
C7 H19 Cl N2 O5 P2 S	75816.9	89499.5	79756.6	58920	64114.7	69352
C2 H N4 O11 P3 S	75484.9	97933.5	106394	90620.8	114708	79253.9
C20 H26 N8	74941.9	46355.8	47064.6	68416.4	45053.3	65094
C23 H49 N5 O8	74629.7	62852	49710	59679.9	54172.9	39709.6
C H2 Br Cl3 N4 O2 P2 S	74594	118702	133504	111071	141019	81806.5
C4 H8 N6 O18	73222.7	77426.2	100734	44900.9	100958	66121.3
C34 H60 N2 O	73216.1	45155.6	77339.7	58531.9	75941.9	71744.5
Phosphocreatine	72737.9	78816.8	57756.8	23670.9	39457.6	24130
C2 H N5 O2	72518.7	69872.2	65229.6	83164.1	58547.9	71313.5
C2 H6 Cl2 N6 O5 P2	72390.8	112268	128962	120395	164082	96834.5
DL-Arginine	72344	57181.6	50004.2	60194.5	47455.6	220741
C18 H39 N O	72164.4	26507.7	56772.4	76259.8	48079.3	54789.5
C13 H34 N6 O P2	72081	38997.2	63045.1	52051.4	73942.3	72919.3
C3 H8 N10 S2	71869.8	70027.1	41918.9	38544.3	32674.8	36508.6
C7 H8 N6 O11 P2	71643.5	62572.8	45153.8	59010.2	63978.7	50248.6
C7 H3 N6 P3 S2	71356	9819.57	8182.42	45768.8	7562.29	74171.8
C8 H17 Cl2 N4 O4 P S2	71280.5	92966.7	37437.6	56549.7	42066.1	56368.1
C2 H6 O5 S	70885.5	127493	57453.8	48524.5	92779.5	137937
Negative_138.11019_0.9	70877.7	69637	48269.4	52764.4	60457.4	97524.2
C6 H16 Cl N4 O10 P3	70529.9	100840	107239	97375.3	103905	67934.8
C20 H26 N8 O S	70116.1	55693.5	59001.2	67504.8	99732.9	69423.9
C7 H N O3	69861.3	107588	61237.8	50133.9	45006.1	49158.7
C4 H3 Cl N2 O11 P2	69743.8	24002.9	93638.3	69083.1	79585.4	65711.9
C H3 N4 O10 P S	69319.4	102003	115451	113512	123003	90966.3
C10 H3 O7 P3	69033.1	196515	201638	46353.3	325051	76255.6
C5 H2 N2 O S	68949.3	131240	139087	51155.8	151538	73827.9
C42 H71 N10 O4 P	67734.4	130174	85803.1	103211	100735	105321
C6 H N2 O3 P3	67676.7	63442	58802.3	47126.6	44722.3	55415.2
C2 H5 N3 O3 P2	67594.1	76556.8	87463.9	66467.8	82542.4	74170.9
C56 H71 N2 O2 P	67413	51182.4	57326.9	92408.4	70021.9	96877.5
C5 H4 N6 O2 S4	67361.1	61097.9	21971.6	11212.9	18430.7	91955.7
C47 H78 N O3 P S	67235.2	11826.2	4331.32	4242.57	1441.2	39266.6
Negative_202.89882_6.323	67202	52441.7	58644.9	35974.2	54369.2	45696.4
C33 H79 N9 O10 P2	67183	79193.4	114054	115961	75186.7	79406
C6 H2 N3 O5 P	67169.7	9696.53	270195	42113.9	27393.5	32818.8
C5 H2 Cl2 O5 P2	67127.4	81326.6	104107	75115.7	89100.3	65844.8
C7 H7 O8 P3	66767	80733.2	97028.8	89887.2	73013.5	55147.4
C H2 Cl3 P S2	66704.1	55644.8	43055	33646.2	41561.5	65220.1
C7 H18 N4 O6 S	66298.4	94600.2	74968.2	2798.04	48727.2	7599.07
C41 H84 N4 O11 P2	66057.6	128592	85271.5	102410	100175	103836
Heptylamine	65965.3	78292.4	53720.2	78533.3	69380.4	60374.2
C5 H14 N O4 P	65570.2	40931.3	53172.6	34355.9	38705.6	43978.6
C H N O5 P2 S	65538.6	68119.4	44741.9	102907	71636.7	73769.6
1-Eicosadienoyl-2-docosahexaenoyl-sn-glycero-3-phosphoethanolamine	65164.1	71240.7	117734	103295	112281	70853.7
Vulvic acid	64902.4	51291.5	55259.5	51828.1	60433.1	58762.9
C46 H70 N2 O9	64648.2	97136	85228.3	77077.3	77835.9	96065.7
Positive_179.89636_0.901	64628.9	74913.7	80632	72577	80959	60204.2
C H3 N3 O5 S	64521.4	66321.3	56333.7	44555	65041.4	43375.4
Positive_837.82912_0.823	64514.3	65614.2	56674.5	45402.8	49103.2	50202.6
C4 H14 N9 O3 P	64229.5	66271.4	54293.1	58495.7	46204.3	81311
C4 H7 O P S	63127.1	71067.4	74079.4	67142.6	60890	61243.4
1-(3-Azido-2,3-dideoxypentofuranosyl)-5-methyl-2,4(1H,3H)-pyrimidinedione	62889.7	33097.9	27625.9	46885.9	38406.4	85455.8
Nonanoic acid	62574.6	71322.7	61983.8	90672.9	110787	73082
C13 H17 N O S2	62525.3	57424.1	71097.1	71328.2	47718.7	61398.3
C2 H7 Cl N2 O4 P2 S2	62448	77301.9	90355.3	72298.1	74425.3	59357.6
C H2 Cl O8 P3 S4	62384.3	75892.9	75838.5	90465.5	92559.5	61055
C4 H12 N6 O2	62193.5	58120.6	48464.6	32881.2	31274.1	45027.9
Ethyl linoleate (JAN)	61823.6	58429.2	47921.2	52113.2	58493.3	64151.1
C10 H5 Cl O2 S3	61727.6	60735.1	42561.5	45112.7	44876.8	60120.2
C8 H19 N3 O8 P2	61641.6	39919.7	33275.1	36389.3	13973.6	18014.7
Negative_138.11019_0.98	61627.6	86964.7	57421.3	69045.2	59040.4	66179.8
C52 H81 N3 P2	61536.4	58180.3	51555.2	33153.1	80958.6	54463
2-(Butylsulfanyl)-6-methyl-4(1H)-pyrimidinone	61532.4	60320.3	47295.6	32209.3	32680.2	44874.6
C2 H3 Br N3 P	61081.6	103655	57856.1	56319.9	71815.6	59317.2
C H Br3 Cl4 N6 O2 S3	61081.1	92354.8	92586.9	77039.8	86738.1	64466.1
Negative_155.06338_0.777	60773.1	50162.7	48853.4	48417.3	53493.7	68338.3
3,5-di-tert-butyl-4-hydroxybenzaldehyde	60749.5	50425.7	46014.1	41198.9	47591.9	59248.2
C9 H O P S	60747	10495.6	178438	22708	32586.4	89284.4
C4 H10 N O3 P	60125.6	100901	83592.9	54199.6	102993	52391.9
N-Carbamimidoylacetamide	60119.1	49209.3	54042.5	61133.4	49947.5	77907.4
C15 H2 Br Cl S2	59919.2	12959	45400.3	39547.1	50585.7	50875.4
C5 H N3 O4 S	59693.7	82155.2	111227	66964.6	64306.6	62301.9
Positive_633.86741_6.356	59653	65066	61212.3	59252.6	56459.7	64504.7
C13 H2 N2 O P2 S2	59596	6257.91	33519.5	13145.2	19851.5	58422.7
C45 H76 N P3	59228.4	1809.08	1714.49	31028.1	1172.17	1687.06
C48 H85 O3 P3	59052.4	70134.8	111549	61956.4	72593	79297.3
C3 H5 Cl3 O2 P2 S	58720.2	75924.8	79952.6	93868.2	104230	81388.8
2-aminooctadec-4-ene-1,3-diol	58599.7	85917.8	84972.3	66393.5	76556.5	68166.4
Negative_116.92634_3.518	58462.8	63670.3	80964.2	70229.7	77258.3	42440.5
C2 H2 Cl2 N P S2	58431.8	74030.9	46913.2	42454.7	37875	84518
Hexadecyl chloroacetate	58410.7	61056.7	61414.2	49252.9	70291.3	68594.4
C3 H2 Cl N2 P	58360.8	55538.9	51608	51305.3	54785.9	72523.4
Leu-Leu	58151.1	63323.2	76739.1	99846.2	74051.1	113774
C9 H16 N6 O3 P2 S	57648.8	45618.9	44396	23048.8	22130.9	33087.1
C4 H9 N3 O3 S	57637.6	46570.5	46666.6	55206.2	45791.8	36353.6
C23 H38	57280.6	44668.9	60154.2	44630.1	35508	49497.1
C3 H2 O5 P2 S5	57168.9	133737	117874	115435	137621	80796.3
DL-Lysine	57119.4	40474	36341.5	361293	355164	398162
C H2 Cl N2 O P S	56972.4	73569.3	35169.6	53430.1	34909.4	88622
C37 H76 N7 O6 P	56159.5	32424.7	56304.2	35669.9	44136.4	44293.7
3-[Hydroxy(oxido)phosphoranyl]-2-oxopropanoic acid	56147	85222.8	168045	27956.3	124751	56889.5
C6 H14 Br Cl N6 O8	55863.7	62273.6	31782.4	22205.4	26119.7	66496.5
cealysin	55751.9	40631.3	114953	121151	38729.8	43155.6
Sulfuric acid	55603.5	53459	36941.7	33532.9	36093.9	39952.4
C4 H10 Cl N10 O10 P3	55337.8	58842	46468.6	25057.7	31364.8	34150.9
C6 H10 N8 O11 S	55120.2	60922.7	73398.1	41827.8	46487.7	47522.8
C5 H5 N4 P	54866	55012.8	51639.3	55298.7	48709.8	50759
C4 H5 Cl3 O7 S	54731.3	78463.7	90367.8	105677	121616	81119.8
C4 H8 Cl N O2 S2	54712.9	57310.8	51388.6	65376.3	37023.7	52788.1
C36 H80 N5 O14 P	54538.9	63048.7	40816.4	47303.2	12658.5	44854.7
C34 H72 N7 O6 P	54254.6	148014	82894.6	3451.79	53441.3	81753.7
C10 H3 Br3 Cl4	54018.2	78088.7	91264.9	86525.9	96837.4	82934.1
C12 H7 Cl3 P2 S2	53798.8	47201.5	51235.2	41720.7	41127.8	58840.5
C H Cl N4 O P2	53770.1	36509.7	28785.5	36427.6	32717.6	55748.7
C40 H78 O9	53447.5	1.11414e+06	603196	12341.1	712527	103908
C44 H75 N10 P3	53355.7	50250.2	63479.2	84580.4	96630.4	24652.7
C20 H30 O2 S2	53190.9	49451.3	54005.6	35897.8	42333.5	46856.2
C11 H3 Cl O2 P2 S	53021.6	50630.2	44535.2	36085.3	44532.6	55945.7
2-Hexyl-3,5-dipentylpyridine	52637.8	37034.6	29009.5	65467.3	50104	20582.3
Dibromoacetic acid	52521	44605.5	31056.6	33849	29003	27981.5
C20 H10 N2	52077.7	42428	41480.2	51799.6	44594.1	52387.7
g-Butyrobetaine	51800.1	61681.9	53161.8	78602	79048.1	83752.1
C H Br Cl4 N4 S3	51742.5	72467	88455.8	86590.6	101583	77223.8
DL-Phenylalanine	51720.8	52770.8	46372.1	453438	475101	376847
C39 H85 Cl N5 O8 P	51685.4	31999.9	91194.9	60409.6	77287.1	54524.4
C3 H3 N6 O2 P S	51606	75044.6	49751.6	42300.8	43759.8	46851
Negative_792.54854_4.719	51189.6	12483.6	20811.6	18454.3	15666.3	151948
C8 H20 N4 O6 S	50915.4	51769.2	92043.9	127548	60459.9	46694.1
C2 H Cl3 N2 O7 P2	50848	58425.1	64600.2	54241.3	61877.4	45446.7
C3 H2 N10 P2	50538.9	77291.6	107697	50994.5	56326.5	47293.5
C4 H16 Cl N6 O14 P3	50295.3	64483.5	47418.8	33656.7	44919.5	34067.3
C44 H78 N8 P2 S	50080.5	38539.1	36580.1	15668.6	40001.5	67952.9
C17 H38 N4 S	49740.4	49535	62373.3	41048.9	65745.7	100835
C2 H5 Cl2 P S	49665.6	58698	58451.2	66912.8	77359	72195.8
C51 H87 P S3	49139.8	54101.7	2589	42395.5	42114.8	51385.1
Reduced Glutathione	49008.8	55232.8	51921.2	96046.8	49573.2	85052.4
C6 H7 N8 O5 P3	48817	44145	30540.2	39317.9	43547.3	35106.5
C3 H12 N4 O2	48570.2	54447.9	55111.3	34782.5	28991.2	38216.5
C39 H80 N7 O8 P	48567.2	25173.2	44690.6	25759	36725	33704.5
C2 H6 Cl O14 P S	48471.9	35818.7	36073.5	51018.6	42800.2	49720.5
C5 H4 Cl N6 O7 P3 S	48190.3	62814.5	63168.8	46030.6	53550.9	41296.8
C8 H9 N3 O6 S	48168.4	22961.9	37683.4	42919.7	14143.1	32844.2
C10 H Cl P2	48129	43845.6	43449.1	35288.1	39776.4	53237.6
C12 H18 N2 O17 P2	48032.9	55089.4	60299.9	57794.1	59693.3	26816.4
C36 H74 N4 O11 S	47882.9	39990	48681.9	39061.3	47795.7	57101.5
C11 H2 Cl O2 P S	47720.8	39410.9	37985.8	28600.5	33543.5	47954.6
2,2,6,6-Tetramethyl-4-piperidinol	47522.9	35375.9	38702.5	51686.9	30960.7	44782
C4 H4 Cl3 P S	47338.5	61756.8	65586	82579.9	84407.4	72479.4
C3 H3 N O8 P2	47314.5	46606.9	49876.1	36728.4	41025.8	46852.1
(6Z,9Z,21R,27S)-24,27,28-Trihydroxy-24-oxido-18-oxo-19,23,25-trioxa-24lambda~5~-phosphaoctacosa-6,9-dien-21-yl (4Z,7Z,10Z,13Z,16Z,19Z)-4,7,10,13,16,19-docosahexaenoate	47259	56332.8	53572.6	50794	48261.2	66297.3
C H4 N4 O10 P2 S	47128.7	104696	91351.3	30974.3	40657.9	46757.7
C3 H2 Cl2 N2 O9 P2	46701.8	58231	69716.2	49376.6	63539.2	44624.5
C9 H10 Cl3 N10 P3	46629.7	62471.1	31307	39544.3	46793.9	38798.4
C5 H5 Cl N6 O9 P2	46522	55454.7	45189.1	16640.1	34294.8	47659.8
C52 H39 Cl N P S	46410.7	51081.6	5137.59	3645.53	6425.06	14434.1
C46 H72 N6 O8	46344.5	28092	1473.96	21801.6	16354.6	133490
C2 H6 Cl3 N2 O2 P3	46319.8	65234.6	56296	58130	72871.6	92240
C4 H2 Br Cl3 N2 O3 S4	46051.4	81920.2	76493.4	65738.9	98059.3	49203.9
Negative_786.52223_4.306	45910.2	55995	1609.49	320.653	44851.8	52834.9
C8 H12 Cl P S	45575.7	46171	55553.4	48227.6	55932.2	48955.9
C10 H25 N3 O4 S	45555.2	36725	30043.8	28283.8	17441.6	36836.3
C2 H4 Cl N2 O2 P3	45304.1	20398	32257.5	47415	28276.8	36345.3
C12 H29 Cl N6	45100.6	34367.2	42723	35889.7	43929.6	48107.7
C3 H8 Cl2 N4 S4	44824.3	43966	34169.5	41146.7	46050.6	81030.7
C50 H90 N P S3	44649.4	43144.7	21994.1	38070	32510.5	37560.6
C2 H2 O17 P2	44533	52966.4	58776.4	48125.2	59168	40332.4
C4 H3 Cl N4 O3 S4	44515.2	27973.4	11201.9	62671.8	23069.2	29019.8
C4 H Br Cl3 P S2	44344.6	61353.4	55302.7	43332.8	44888.1	37735.9
Cholesta-2,4-diene	44340.5	2454.71	2426.37	38850.6	2427.61	41520.1
N-Undecanoylglycine	44286.5	54521.4	76767.4	200903	187456	78852.1
N-Ethyl-6-(methylsulfanyl)-1,3,5-triazin-2,4-diamin	44240.1	33731.2	25301.6	35636.7	29464.2	44468.8
C4 H5 O6 P	44218.9	130765	101911	72456.9	146471	74341.4
Dimethylsulfamyl chloride	43947.9	112572	70247.8	49040.1	59544.2	37502.7
C50 H74 N2 O9	43939.6	55693.9	57542.3	36768.1	52264.7	53523.7
C2 H5 N O4 P2	43888.1	13104	23479.9	28407.2	10227.1	20657.4
C35 H80 Cl N9 O7 P2	43836.8	33362.1	60348.9	68652.3	88312.1	7349.73
C5 H Br Cl3 N2 O5 P S4	43800.4	57754.4	86402.8	76088	76766.3	47372.8
C4 H4 Br2 Cl4 N2 S2	43505.8	67851.9	77030.8	82377.1	86180.7	65850.7
C H3 N O5	43486.3	41276.1	37929.7	45833.9	34530.4	41226.9
C5 H12 Cl2 N2 O11 P2	43401.7	56587.5	45634.2	84210.9	85295.3	28159.8
Positive_701.85459_6.355	43068.7	45670.5	43299.6	39538.4	40781.4	43413.4
C3 H Cl O11 P2 S	42807.3	62353	65852	68466.3	71018.3	36172.4
C7 H8 Cl4 N2 S3	42800.9	49513.5	38967.5	26429.7	49795.7	40012.1
C7 H4 Br Cl2 P3	42765.8	57289.7	62429.8	72351.4	75331.1	58815.2
C H2 Cl O2 P S2	42705.1	60438	54859.3	38240.7	42190.4	35773.5
C12 H12 N10 O7 P2	42504.5	68617.1	97960.9	96349.1	108778	31138.8
C3 H7 O8 P S5	42470	39729.6	40996	36870.5	41635	39780.6
C6 H11 Cl N2 O2 S2	42305.6	30750.1	38829	51499.9	12267.3	38983.9
C4 H2 N5 O2 P	42289.7	43922.6	66254.6	60656.6	33703.3	59216.3
C39 H80 N8 O8	42278.1	15270.4	11074.6	27840.8	12451	57090.6
C29 H45 N8 O4 P	42140.4	41204.2	38538.6	33655.4	36828.9	41511.5
C37 H78 N4 O2 S	42130.7	38986.1	21039.5	25246.8	17908.8	39592.6
C5 H17 N6 O16 P3	42120.4	41949.4	57713.9	29201	27158	32321.6
C23 H50 N3 O4 P3	41587.9	42557.2	41689.2	30568.1	40480	39243.4
C18 H46 N9 P3	41472.2	37658.8	42284.6	39094.8	29364.8	52656.2
C H3 Cl N2 O6 P2 S	41462	54971.1	57814.2	54169.9	66444.2	33606.5
C6 H14 Cl N P2	41354.9	34718.6	68129.2	27864.4	26165.4	29968.1
C40 H82 N3 O9 P	41341.4	43909.7	40375.3	24466.1	29243.7	1623.14
(1S,2S,4aR,5R,8R,8aR)-8-[(5R)-5-Chloro-2,6,6-trimethyltetrahydro-2H-pyran-2-yl]-1,5-diisocyano-2,5-dimethyldecahydro-2-naphthalenol	41325.4	40798.3	37702.9	37448.2	28090.2	49297.6
2,2,2-Trifluoroethanol	41307.2	59555.4	56927.1	65670.8	46620.1	53178.3
C2 H4 Cl4 O3 P2	41011.3	68740	77764.2	102162	109974	86897.8
C20 H41 Cl S	40976.5	46905.8	31426.9	27306.2	20742.1	56929.3
2-Methyl-2-nitro-1,3-propanediol	40775.3	49880.5	26544.8	15390.2	26810.4	22380.3
Isopropyl myristate	40646.1	45665	47859.2	45606.1	46830.4	54828
C14 H36 N10 O2	40543.6	33622.1	40436	30026.1	38808.9	21836.4
C5 H9 N3 O5	40349.3	48243.5	42034.9	37879.5	42370.3	37231.3
C H Cl4 O6 P3 S5	40323.1	70179.8	75589.9	85149	97465.8	72706.2
C2 H4 O14	40256.3	39825.2	16999.6	30704.3	32247.2	20521
UNII:DIW6F13QW2	40109.4	41052.6	40814.9	211470	177836	216753
C8 H4 Br2 Cl4 S5	40052.7	57832.8	77829.7	78485.4	83316.3	56776.5
C15 H27 N2 P S	39986.3	33682.7	32079.1	31366.9	31480.3	42271
C3 H4 N8 O	39924.2	40608	70018.8	65870.2	64603.9	83937.6
C25 H38 N4 O5	39919.3	38878.6	33252.9	30327.1	38892.7	34871.7
DL-Carnitine	39883.3	66114.9	45491.4	56583	61647	60390.1
C4 H9 N10 O12 P3	39783.8	20311.5	21418.2	12795.8	17311	41635.8
C4 H10 N10 O P2	39695.4	50142.5	29368.8	24201.7	28495.3	30351.6
C5 H10 Cl N6 O6 P S3	39685.7	65147.5	65972.6	64003.9	64403.4	63556.8
C4 H6 Cl2 N4 O P2	39654.9	64968.4	83093.1	107882	118116	48638.7
C39 H85 N5 O9 P2	39645.1	25338.1	20149.3	23246.2	23235.1	27971.8
C8 H18 N2 O11 P2	39586	37364	26925.6	25683.2	32887.2	29447.2
C3 H11 Cl2 N4 O8 P3	39152.7	63458.4	64644.4	63085.4	62738.7	62689.9
C16 H11 N8 O12 P	39151.1	47912.1	58827.1	63441	56764	25147.9
C3 H11 N7 O P2	38894	37691.8	39312.4	29706.3	34995.7	33207.1
Myristic acid	38601.9	168544	140460	143502	117567	165052
C H2 Br Cl4 N2 P3 S	38596.6	49101	50720.2	35750.4	36558.6	31841.8
C5 H2 N3 P	38387.4	48522.2	40037.5	58662.2	46126.7	37611.3
DEET	38319.3	40528.5	38238.7	43789.3	53216.2	38162.1
C52 H72 O2 S	38168.5	39658	30988.9	34206.3	32444.7	63291.1
C2 H3 Cl4 O10 P S	38084.1	42651.4	52421.1	49296.5	49145.5	32500.1
Positive_157.91452_0.969	37876.3	70411.7	61375	67253.1	40510	60802.6
C6 H17 Cl4 N8 P3	37871.3	43658.8	47160.1	31450.7	29818	31878.8
C7 H2 N O2 P	37815.9	59783.1	48989.2	16507.7	51926.4	37948.8
(+/-)-Metamfetamine	37759.6	28860.5	38375	42050.5	34299.8	40699.9
(2E)-[2-(3-Hydroxy-3-pentanyl)-3,4-dihydro-2H-pyrrol-5-yl][5-(3-hydroxy-3-pentanyl)-2-pyrrolidinylidene]acetonitrile	37732.9	35616.7	20949.2	18725.2	14920.7	41906.4
C17 H32 N4 O8	37488.1	22426.6	26534.2	36804.6	18602.7	33911.4
C5 H4 Cl N2 P	37430.5	51577.9	52051.5	44353	49566	47309.4
C2 H2 Cl3 N4 P3 S5	37358.4	56215.1	63762.2	53390.2	74165.5	40151.3
C4 H11 Cl N2 O3 S5	37346	61861.5	52927.2	25416.2	62413.2	32005
Triethylamine	37248.2	31511.6	32972.2	33532	37166.9	29227.3
N,N-Dichlorourethan	37182.8	60715.9	58492	35452.3	28500.1	75302.5
C24 H41 N5	36989.2	3686.7	22282.8	914.186	20575.9	15798.3
C21 H44 P2	36796.3	31768.7	32651.6	24138.1	20398.1	41855.8
C2 H3 Cl N4 O15 P2	36731.8	27885.3	27370.5	40021.5	25697.2	27873.2
6,6-Diethoxy-N,N-diethyl-1-hexanamine	36699	35107.7	37705.2	41587.3	33573.9	38812.4
C3 H3 Cl N6 P2 S2	36336.1	38351.8	30928	42325.7	29243.3	28332.7
DL-TYROSINE	36279.2	39129.3	33067.4	116685	122950	115514
8-[2-(2-Aminophenyl)-2-oxoethyl]-3-(2-hydroxy-2-propanyl)-6a,7,10b-trimethyldodecahydro-1H-benzo[f]chromene-7-carboxylic acid	36089.7	37474.9	33353	30387	37465.6	24841.8
C3 H8 Cl2 N6 O5 P2	35947.3	63865.4	86425.2	110312	122439	43210.5
C20 H31 P	35897.6	23474.8	27717.4	36181	24183.1	33692.5
C3 H6 Cl4 N2 P2 S5	35894.1	85811.6	94892	127381	108950	42673.3
C35 H80 Cl N9 O9 S	35849.1	50447.7	28335	35813.2	43663.8	5789.13
C7 H Br2 O4 P3 S5	35734.6	53940.9	65421.9	70610.8	73799.4	53694.8
C17 H26 O2 S3	35640.8	23997.5	21803.4	15591.5	29913.3	24866.9
2-(Isopentyloxy)-1,3-benzodithiole	35415.2	30610.4	29401.2	28994	40357	34222.2
C14 H3 Cl3 O S2	35006.3	38140.4	31421.6	28156.7	40336.1	43852.8
C10 H21 N4 P S	34755.9	24713.2	51236.5	67658.3	17188.8	19932.2
C3 H5 N2 O9 P3 S	34607.6	44574.2	47983.3	36303.9	43200.2	34103.2
C10 H3 N2 P	34545.6	45291.7	52205.3	37356.6	36094.5	42772.7
1H-Pyrrolo[3,2-d]pyrimidine-2,4(3H,5H)-dione	34493.2	48091	50854.4	45149.6	46017.4	307381
C3 H3 N3 O6	34234.7	33035	44055.1	56741.3	53368.4	62308.7
Imidazole-2-methanol, 1-methyl-	34211.3	21796.6	18354.2	21847.7	18713.7	21847.9
C9 H N S	33837.3	51244.6	82388.7	49252.6	49380.5	53264.2
C5 H5 N7	33717.3	33261.7	27995.2	38359.4	24448.3	31581.1
C45 H68 O3	33639.8	40074.1	48824.6	39178.1	47903.9	57175.7
Positive_513.67046_0.866	33611	33005	90428.7	57816.8	59285.3	35688.8
C4 H3 Cl2 N6 O5 P3 S	33310.4	40393	48834	33716.2	43403.1	30176.3
C5 H9 Br Cl4 P2	33110.8	44327.7	55710.7	71568.2	74443.8	46608
C H4 N2 O6 S2	32989.9	40280.5	32910.3	35319.5	34223	36250.8
C2 H2 N8 P2	32947.7	75791.1	63444.3	36024.5	84715.9	45084.6
C13 H12 Cl N4 O14 P	32929.9	50775.4	50856.8	69218.4	47212	24300.1
C21 H36 N2 P2	32895	31696.5	33024.3	28610.6	34361.7	38463.6
C2 H6 Cl3 N2 O7 P3 S	32854	38397	50268.9	34407.2	42734.8	24708.4
C6 H10 N O2 P S	32835.9	37412.7	29406.8	55912.5	49506	53370.5
1,3-Bis-(methylthio)-2-methoxypropane	32774.4	73251	79668.7	31327.3	42258.2	32878.7
2-Amino-4-(methylsulfanyl)pentanedioic acid	32703.1	42157.6	39256.7	33313.8	51827.8	25151.6
Methyl (9Z)-9-hexadecenoate	32693.4	30866.7	28481.5	37052.6	31960.2	42356.2
C3 H2 Br P S	32502.1	29183.1	17896.3	14542	11955.6	24371.8
C50 H83 N3 O2 P2	32253.7	32506.9	39830	39545.5	34467.9	37609.3
C51 H92 N P S3	32223.7	25485.5	34849	40767.6	27626.1	24620.7
C44 H71 N6 O8 P	32177.7	28122.3	26126.3	28245.3	23075.1	28097.2
C5 H4 Cl4 N4 O S5	32159.1	39317.2	57769.2	54049.4	58940.7	18986.7
C9 H5 O4 P S2	31919.7	42696.2	34643.8	35821.3	30429.4	32301.4
C6 H17 N5 O4	31886.2	15215.9	31921.3	34203.6	31268.7	27686.9
C5 H4 N2 P2	31846.3	39252.7	32526.7	30831.3	30945.9	38285
Negative_84.03058_6.022	31831.8	55129.5	37732.5	12857.2	12013.2	26047
C11 H20 N2 O9 P2 S	31781.8	23016	23857.6	9297.36	10999	17778.8
C24 H43 N10 O6 P	31758.3	32062	31955.9	31534.6	34439.1	39604.2
Hexahydro[1,2,4]triazino[5,6-e][1,2,4]triazine-3,6(2H,4H)-dione	31649.5	11239.7	57637.9	91673.3	17292.1	24222.7
C11 H4 P2 S2	31613.9	29421.4	26781.1	21512.6	21633.1	36431.7
C3 H7 Cl2 O7 P	31483.8	21407.3	19370.4	16702.7	9146.67	18289.1
Umbelliferone	31427.1	17183	110303	239836	30090.1	21637
(+/-)-2-Hydroxyglutaric acid	31390.6	37619.8	34451.3	30244.8	36130.6	44846.2
C H3 Cl O3	31346.5	39851.7	21219.6	30551.6	40634	17383.1
C4 H15 N6 O16 P3	31291.5	30665.4	21597.7	12673.9	26635.3	26383.8
C4 H12 Cl3 N6 O12 P	31247.5	46446.1	25381.2	10288.9	17892.1	34819.9
C18 H22 N4 S2	31029.7	42181.8	31708.5	30364.9	26216.9	62791
C52 H88 N O5 P S	31000.1	50856.7	61284.9	49720.9	37567.1	30748
C11 H16 N O11 P	30915.2	26578.3	27132.5	35237.7	25726.2	21080.7
C41 H89 N5 O S5	30894.3	27229.7	58469.6	5051.49	23600.9	16612.8
C9 H3 Cl N2 O S4	30849.2	53454.6	47347.8	35704.5	40154.6	33444.9
C52 H76 N6 O3 S	30803.1	40337.9	29354.5	28745.2	22674.7	10687.5
C7 H8 Cl N2 O13 P3 S	30613.9	36247.9	39401	27142.3	34526.6	24126.2
C4 H4 Br3 Cl4 N4 O P S4	30610.9	40252.9	52263.6	38306.8	41746.8	23426.9
C10 H19 N O3 S	30599.2	26716.6	24146.6	23302.3	25012.3	25367.7
C6 H17 Cl N4 O4 S	30323.9	44099.8	34336.4	26268.5	29964.7	36052.1
C2 H2 O10 S	30179.2	28393.6	32716.8	33053.4	41375.6	37335.3
C11 H4 Cl N8 O7 P S	30049.3	33513.9	28376.6	19733.1	12811.8	20949
C3 H9 Cl2 N10 O8 P3	30043.7	42383.3	41954.4	43995.6	49823.5	15812.1
C7 H15 Cl N2 O P2	29788.7	32904.5	31085.4	20674.6	24387.9	24277.4
C3 H4 N6 O	29772.7	21444.5	21798.9	27955.1	19262.9	26822.8
C14 H3 Cl3 O4 S2	29675.7	26908.7	29636.6	20529.3	23336.2	30769.1
C6 H12 Cl N S2	29644.5	33106.4	33850.9	31107.1	25311.3	26114.3
C19 H38 N O4 P	29637.4	23272.6	20835.2	32195.7	15859.9	27669.2
C67 H114 O11 P2 S	29625.8	12070.9	1752.92	6657.02	4139.08	1526.89
O-[{(2R)-2-[(4Z,7Z,10Z,13Z,16Z,19Z)-4,7,10,13,16,19-Docosahexaenoyloxy]-3-[(9Z)-9-octadecenoyloxy]propoxy}(hydroxy)phosphoryl]-L-serine	29602.7	37515	42154.1	48704.6	44503.5	66136.3
C9 H19 Br Cl3 N4 O5 P3 S	29585.1	33579.5	28573.6	17050.5	24478.5	25751.1
C2 H8 N4 O2 P2	29426.6	27077.8	17142.6	15824.3	19635.3	15764.6
C3 H Cl4 O P3 S5	29386.3	27741.5	30275.5	25247	29143	19614.7
C9 H19 N5 O5 S	29180.4	22799.6	18698.2	14635.9	15182.8	20622.8
C4 H5 Br N2 O	29104.5	24997.4	26979.6	24547.5	30407.5	34982.8
C3 H8 N2 O6	29074.1	30865.4	25453	26006.3	28576.2	24693.5
C5 H2 N4 O9	29037.5	45847.7	41162.2	42149.8	59742	14355.5
Methyltrioxitol	28663.3	32381.3	29006.8	33505.1	25926.2	30523.9
Negative_145.92915_3.531	28532.6	24411.1	40118.9	30428.8	37562.3	21124.7
L-alpha-Glycerylphosphorylcholine	28428.7	19809	13285.5	29676.7	8592.84	37042.3
(+/-)-Coniine	28400.4	58780.4	39363.7	23562.4	37781.4	41578.6
C2 H Br2 Cl3 N2 O2 S3	28127.6	37261.6	36882.7	33189.6	30552.2	22769.4
L-(-)-methionine	28102.7	21768.5	21119.4	88068.5	62102.6	86384.1
C47 H78 N O2 P S	28102.2	76859.2	71057.5	4025.12	77560.9	40536.4
C52 H82 N5 O P S	28075.2	43642.2	48530.2	36211.2	34419.6	43624.2
C7 H5 Br Cl4 O S2	27921.9	35067.1	40431.4	48748	48581.8	41147.5
C4 H15 N9 O6 P2	27866.1	34254.9	23912.1	16133.8	23144.2	18067.8
C4 H3 Cl O S	27778	22472.3	22500.9	21498.6	30581	29314.9
C21 H47 N5 O7	27645.2	39225.5	34531.4	23502.4	18031.3	42954.1
C41 H73 N3 O	27556.2	23746.3	21527.2	18088.1	14046.9	25103.5
C2 H2 N2 O8	27511.4	23623.4	19100.2	33699.4	13387	39147
C4 H15 Br Cl3 N8 O8 P S	27498	33145.8	13447	19939	16526.5	19295.5
Positive_769.84177_6.359	27420.1	30497.7	27778.6	26814	25374	30365.7
C4 H N8 O P3	27387.9	27799	38336.9	32274.5	53749	30897.3
C3 H8 N O8 P3 S	27371.6	24031.1	6320.39	29949.3	20371.5	22623.6
phenacetin	27344.4	27663.5	29785.8	19820.7	59455.4	56872.3
C13 H3 O5 P	27146.3	34208.2	30534.5	25674.3	25714.1	24781.6
C2 H7 Cl N2 P2	27125.3	13628.2	15753.5	19902.6	9404.92	14027
C58 H68 O3 P2	27118.9	18512.2	16427.5	19912.8	14405	31487.3
C3 H4 N2 O8	27083.4	18100.3	29087.8	174588	55012.4	222130
C6 H13 Cl N O6 P S	27014	27959.9	33786.5	41769.2	19631.6	28493
C25 H52 N O9 P	26895.2	22508.2	22074.5	19715.4	15135.5	32075.9
C46 H80 N O3 P3	26733.3	101623	90619.7	100762	132384	38865.5
C4 H14 Cl N8 O2 P3 S4	26665.7	35354.4	21632.6	21264.6	26637.4	20668.1
(10E)-9,12,13-Trihydroxy-10-octadecenoic acid	26627.7	20999	21503.3	26315.1	19546.3	27405.4
C5 H16 N6 O S2	26348.7	18139.4	18064.5	27896.3	23131.4	29304.1
C13 H23 N6 P3 S	26332.3	28296.7	15515.5	16465.5	17162	15299.9
C6 H11 N2 O P S	26245.2	24904.4	22502.6	34851.9	64390.3	46214.6
C24 H46 N3 O2 P3	26226.4	24834.9	26683	40680.1	30300.7	31923.2
C11 H21 N2 P	26149.9	26217	24947.6	22035	22849.9	25975.3
C29 H44 N3 P	26117.1	16614.5	11432.4	19291.1	14135.6	21708.9
[4,6-Bis(isopropylamino)-1,3,5-triazin-2-yl]methylcyanamide	25988	25419.1	34609.9	832972	821306	339976
C43 H81 N6 O10 P	25945.9	14899	7334.56	8573.33	13104	30120.8
C5 H11 O2 P3	25936.6	24602.9	54135.2	34403	31878	29976.3
C2 H2 Br3 Cl3 N2 O10 P2 S5	25820.7	48647.5	36631.6	30826.5	46886	33138.7
C5 H10 Cl2 N10 O11 P2	25599.8	27541.7	29236.5	24839.5	16750.7	22718.3
Cyclohexyl-(4,4-dimethyl-4,5-dihydro-thiazol-2-yl)-amine	25413.6	25242.1	20623.9	12087.5	23034.2	22263.1
C10 H19 O P S	25353.4	20174.2	21897.5	19741	19351.4	19945.7
Negative_145.92912_6.293	25277.2	46289	24968.9	23926.4	25859.3	20141
C5 H13 O14 P S5	25245.9	21885.4	23047.4	17018	19694.7	23699.7
C2 H Br2 Cl2 N6 O2 P S3	25222.3	49142.1	36356.5	48886.4	58395.4	30995.6
C5 H8 Cl N O4	25164.2	34647.3	30984.7	20413.1	28086.1	21406.5
C2 H Cl3 N4 S2	25137.9	23750.4	27898.4	29569.3	31857.2	28840.1
(2R)-3-{[(2-Aminoethoxy)(hydroxy)phosphoryl]oxy}-2-[(1Z,11Z)-1,11-octadecadien-1-yloxy]propyl (11Z)-11-icosenoate	25066.2	57921.8	75704.5	67133.3	51577.3	26617.1
veratraldehyde	24971.7	19575.1	17126.2	16776.8	17778.6	26579.1
Negative_90.94694_6.304	24945.4	21551.4	19001.5	15844.9	19159.7	21419
C H N4 O5 P3	24799.8	25191.5	18366.6	20632.3	24903.5	11480.3
C16 H27 N2 O P	24748.2	25718	20620.9	19459.9	20365.2	26602.5
C8 H20 Cl N4 O7 P S3	24629.4	40225.6	72517.9	66040	45981.7	23729.1
N,N'-Dimethylsulfuric diamide	24491	21006.5	18249.7	26904.2	16947.9	23469.4
C12 H16 N8 O17 P2	24475.2	24969	27846.9	19500.2	22000.4	13447
C6 H5 N5 O4	24407.4	29682.6	31591.9	19570.3	19541.2	27274.6
N-tert-Butyl-.alpha.-phenylnitrone	24389.5	24401	21384.1	22606.1	22587.7	24109.9
Positive_171.05959_0.89	24357.3	55691.4	47728.5	25248.1	50658.8	20961.4
C2 H8 N O15 P3	24332.6	19021.2	20877.5	16710.3	15969.8	23608.2
C7 H2 Cl2 O6 P2 S2	24324.7	37121.3	44924.6	55062.1	46215.1	26143.2
C13 H31 N2 P S	24201	21804.5	18872.5	16865.2	19945.2	24787.1
C36 H73 N6 O8 P	24148.1	53827.2	50151.7	69187.6	43249.1	2961.04
C44 H90 Cl2 N3 O3 P S	24048.7	23355	67179.9	10345.4	27708.9	14925.9
C2 H4 Cl P S4	23879.4	30575.8	23398.1	27543.1	27914.3	28925.9
C4 H13 Cl4 N6 O11 P	23857.4	29241.7	19428.2	16709	16863	17337.4
C20 H43 O5 P S	23680.2	15038.3	14263.6	19592.5	12604.7	18465.3
Ethyl (9E)-9-octadecenoate	23648.5	17065.4	27820.2	25026.7	20707.2	23200.5
C46 H77 N3 O6	23623.2	11617.9	28429	22265.8	3689.94	27326.9
C39 H81 N O2 S4	23503.4	1694.12	2632.57	16014	2808.79	544.914
C15 H4 N2 S4	23384.5	24179.2	21461.1	24288.4	20803.7	22197.4
Alanylleucine	23328.6	24454.5	24201	37812.2	40158.4	48299.1
C5 H14 Cl N2 O3 P	23328.4	35250.4	33091.9	42981.6	22871.7	49823.6
C14 H20 Cl2 N6 O7 S4	23252.8	30895.6	26712.2	24003.2	22441.9	16046.1
15-Tetracosenoic acid	23251.8	22256.3	19873.8	26304.6	17044.8	991.561
Negative_553.93459_0.781	23220.5	17923.9	11687.6	4874.78	11568.1	20696.9
C8 H12 N10 O3 P2	23165.5	20471.1	23401.4	20566.9	20900.5	21704
C9 H8 Cl2 N6 O11 S4	23086.5	22067.6	24359.1	4330.08	17882.5	16753.9
C11 H16 N4 S3	23049	16421.7	17957.5	13549.2	16620	7159.85
(2S)-3-(beta-D-Galactopyranosyloxy)-2-[(9Z,12Z,15Z)-9,12,15-octadecatrienoyloxy]propyl (11Z,14Z)-11,14-icosadienoate	23006.6	26973.4	28603.3	20148.2	17673.1	33651
C29 H53 N3 S2	22996.5	29242.6	26355.3	31109.2	17002.5	28837
C7 H4 Br N10 O3 P3	22972.9	21084.1	5303.07	5041.88	5218.94	20608.7
C3 H4 Cl2 O2 P2 S	22919.8	30402	38662.3	50449.1	45296.5	39366.7
C8 H2 Br N6 O P3	22832.6	31669	29852.4	33012.2	32766	33069
C5 H17 Cl N6 O S2	22815.6	34698.9	32747.7	42627.9	26517.7	48615.4
C5 H13 Cl N4 O2	22734.6	22516.5	22673.3	28205.3	27014.5	23265.7
C5 H9 Br2 Cl3 O2 P2 S4	22697.4	34890.4	37492.3	30912.2	37102.2	21289
C8 H5 N2 O P3 S2	22662.2	26439.5	28202.2	28273.2	13410.6	20028.1
C7 H Cl2 N4 P3 S3	22623.6	28949.8	35672.8	35358.4	38892.6	20545.7
C21 H48 N9 O14 P S3	22619	18085.3	1320.61	2806.24	1617.48	5115.65
C15 H40 N9 O7 P3 S2	22599	25621.2	1504.17	3287.89	11737.9	12898.5
C4 H6 Cl N6 O5 P S3	22589.2	31862.3	31941.7	21853.3	38593	45833.4
C4 H10 Cl N3 P2	22479.6	21767.4	13688.9	10637.3	12393.1	17341.4
C17 H35 N8 P3 S	22239.8	25420.6	8770.06	10070.3	12726.2	10620.2
C14 H2 Cl3 N2 O4 P S2	22234.2	20392.7	21661.8	16540.5	18606.5	22102.4
C5 H10 N6 O7 S	22137.2	25116.6	10322.6	10341.4	11595.8	9564.51
C4 H4 N4 P2 S	22135	31844.7	35451.1	23940.9	51335.5	22419.6
C7 H15 Cl N4 O13 P2	22102	22014.1	25709.1	29250.9	20665.2	29624.2
C2 H7 Cl4 N2 P3	22093.8	37404.4	52938.3	72081	85016.7	30988.8
(4-Amino-2-methyl-5-pyrimidinyl)methanol	22026.6	15236.7	14901.2	21075.2	5942.77	29592.4
gamma-Aminobutyric acid	21981.9	14584.4	14762.5	14417.9	16373.6	22297.5
C4 H8 N8 O4	21964.4	18525.6	5971.41	12254.1	12299.2	24151.5
(2S)-3-(beta-D-Galactopyranosyloxy)-2-[(9Z,12Z,15Z)-9,12,15-octadecatrienoyloxy]propyl (11Z,14Z,17Z)-11,14,17-icosatrienoate	21938.4	24520.9	10692.8	15482.2	16499	5858.28
3-Thiomorpholinecarboxylic acid	21838.6	52994.9	34122.1	147914	225556	76729.2
C37 H38 Cl N S3	21773.7	24686.6	72277	51736.6	22240.6	21994.9
C23 H51 N5 S4	21627.9	12685.4	13583.7	22704.2	5266.25	10767.5
C13 H7 Cl2 O P S5	21486.3	16976.4	19776.8	12065.5	16796	18703.8
Positive_805.59685_4.184	21366	17900.9	16033.3	25872.8	41854.9	27617.5
C H4 N O5 P S	21334.8	38003.2	21189.3	9556.29	14407.9	26553.5
C40 H76 N7 O5 P	21329.1	42688.4	21899.9	1974.97	32210	23596.6
C11 H14 N8 O17 P2	21301.8	20970.6	20172.3	12575.2	11911.6	15836.3
C38 H78 N3 O2 P3	21265.6	3403.71	9575.46	11641.8	408.498	7246.01
Negative_567.94996_0.776	21117.1	26942	32952.1	17253.5	16034.1	20066.4
C39 H71 N9 O2 S2	21115.7	93980.9	85122	81239.4	108846	1547.39
C6 H8 N6 O9 P2	21110.3	19109.6	13576.3	17618.1	19221.1	15093.4
Negative_149.91226_3.926	21072.6	18765.4	14272.1	15871.2	14603.3	20181
C3 H Cl2 N3	21036.4	19778.4	19300	16609.6	18991	18696.7
C10 H7 N6 O P3	20972.2	18646.1	12723.3	17611.1	18424.4	15704.9
C14 H3 Br2 Cl N2	20911.6	14004.5	4972.43	8841.04	14564.8	8114.08
C40 H83 N5 O7 P2	20874.1	96003.8	82988.4	26042.2	46263.8	26447.5
C3 H N4 O P	20868.8	28281.5	34043.5	25378.5	27241.1	22879.3
C3 H3 O2 P S	20788	15226.7	9959.12	10702.8	11301.1	13646.9
C6 H6 Cl N3 P2	20734.2	27782.3	46739.3	35392.3	18511.9	25384.5
C H2 Cl2 N2 O4	20688.5	28456.4	38145.4	44639.2	58196.9	28135.2
C4 H Cl O S2	20626.1	22020.6	25150.6	27111.3	32096.2	31218.1
DL-Tryptophan	20610.9	8991.86	22282.9	322462	270839	252696
C41 H80 O11	20604.3	15797.8	22834.9	10795.5	25324.6	16168.2
C8 H2 Cl3 P	20590.3	32688.1	40281.7	66357.4	70121.3	28001.2
C2 H3 N5 S	20576.6	161578	17316.1	156874	11372.8	72367.1
C3 H7 Cl N5 P	20564.4	47430.6	43322.4	22254.1	60448.6	26959.6
C7 H16 N2 O P2 S2	20520.2	28483.5	19525.4	16517.9	19233.5	23095.5
(2S,3R)-2-Amino-1,3-heptadecanediol	20516.1	31601	34230.4	33284.3	29232.9	27766
C2 H2 N2 O12 S2	20478.1	18772.1	15454.2	12039.1	11494.6	13580.2
C H4 N4 P2 S	20405.8	156398	242865	6130.1	98992.2	16844.4
C2 H6 N2 O6 S	20364.8	25850.1	9991.94	16951.4	24044.4	27033.2
Cholesteryl palmitate	20207	19273.4	13533.5	11391.7	9576.67	15873.8
C21 H52 N9 O2 P3	20194.4	21109.6	26111.5	25888.5	26366.7	19783.1
C46 H84 N P3	20153	13503.9	31544.7	24267.1	6975.87	15256.2
C11 H30 N5 O4 P S	20125.5	9547.4	9328.06	4819.73	7829.44	14267.7
C6 H2 N2 O	20106.3	19577.2	23962.7	16502.8	15676.8	18072.2
Valproic acid	20042.3	19816.7	17138.8	16424.1	19481.3	18581.3
C22 H42 N8	20019.8	25895.4	16987.9	37187.6	28144.4	43924
C23 H40 S2	20007.7	16655.5	15577.2	16992.6	24789.5	15479.7
5-Allyl-2-amino-6-methyl-4(1H)-pyrimidinone	19913.5	8857.26	8420.34	14238.5	10514	13009.3
C H3 Cl4 N2 O11 P3 S2	19838.6	22061.4	28592	32434.2	31965.8	20374.3
C41 H87 N2 O7 P3 S	19771.1	24955.7	19642.1	20430	17137.9	25541.2
C11 H26 N6	19765.1	16593.9	14200.6	16209	13910.6	18412.6
C5 H15 Br N6 O S2	19757.6	17445.9	12033.1	15684.7	16641.2	14971.8
C6 H14 Br N2 O2 P S4	19727.7	31530.5	38043.7	51313.8	55329.1	30234.6
C52 H79 O3 P3	19630.2	33039.4	28033.4	35732.8	30362.4	49261.5
Negative_821.56666_4.662	19580	23320.3	16736	22536.1	19317.1	1651.89
C23 H39 N5 O9	19524	18513.4	11777.8	13351	7445.6	20669
C5 H11 N O2 S2	19500.5	13214.7	17859.4	16145.4	17840.9	21228.6
Dichloroacetic acid	19465.9	5357.8	5961.29	20370.8	2674.9	9320.99
C4 H Cl O2 P2 S3	19436.5	22784.9	20244.8	19706.3	23789.5	19452.7
Positive_661.52257_0.861	19348.3	26643.9	32571	24151.8	30381.4	20554.6
Negative_779.92787_4.133	19307.7	23288.4	34094.9	30130	26966	429.418
C9 H16 Cl N2 O11 P S3	19295.4	32362.2	41086.6	39574.3	46293	21575.6
C5 H11 Br Cl N5	19286.6	14008	11704.6	8734.69	6440.33	10201.2
C3 H3 Cl N4 P2 S	19244.6	10085.6	5112.1	11733.5	11353.7	12541.3
C36 H76 N7 O6 P	19213.5	23289.3	36293.3	27582.9	22953.4	26668.4
C6 H3 O15 P S	19202.4	18376	14000.8	11372	11404.6	14001.9
C4 H3 Cl N O6 P	19190.6	19315	18353	13160	12034.8	13109.3
C42 H77 N9 O5	19185.5	34526.9	26829.8	24978.6	13311.8	10910.7
1-phenylethanol	19177.2	6614.48	18038.5	14209.1	8758.08	19856.7
C35 H74 N5 O11 P	19137.4	16565	25357	202020	18672.7	18297.7
C4 H N5 O S	19091.1	26666.2	21646.6	20126.8	22427.2	26514.4
C4 H6 Br3 Cl2 O P3 S	19087.9	24291.4	22902.5	15182.9	20248.2	16665.5
C43 H78 Cl N7 O7	19005.9	39207.1	23300.2	20691.6	24093.9	38691.7
Gly-Leu	18940.3	23492.9	21189.6	39707.8	48512.2	58317.3
C5 H15 Cl2 N4 O8 P3	18908.5	34369	43657.3	52307.5	59254.2	17897.8
C3 H Cl O6 S2	18902.1	21892.3	22185.1	17252.4	17322.5	17255.5
C20 H37 N7 S	18890.3	1411.59	327.385	23886.1	8327.42	20710
C20 H41 N O7	18890.3	10085	14895.3	773.37	8327.42	20710
C2 H3 Cl N O6 P S	18878.1	16858.2	15545.1	15839.3	18447.6	13618.2
C4 H2 Br N O S	18870.7	25208.8	22533.9	14970.3	22351.7	12368.7
(4-Ethylcyclohexyl)(4-morpholinyl)methanone	18718.8	23611.9	31679.2	92368	88548	30687.5
C9 H17 Cl4 N2 O8 P3	18711.5	26280.4	23650.4	15875.9	19255	17827.2
C7 H5 O3 P	18697.6	31911.6	26096.6	12197.6	34513.4	18617.6
C24 H48 O7 P2	18677.6	17996.8	15997.6	31440.5	36346.5	41407.3
1-(Propyldisulfanyl)-1-(propylsulfinyl)propane	18579.2	48433.1	23814.1	18510.2	12223.2	13582.8
C18 H16 N2 O14 P2 S	18532.1	14747.6	10555	6787.92	6154.53	13486.1
2-[2-(Octylamino)ethoxy]ethanol	18512.1	20095.9	17076.4	16568.9	19510.1	16431.1
C6 H2 Cl3 N2 O6 P S5	18444.3	26195.2	31335.6	17273.7	29755.6	13686
C11 H28 N6 O2 S3	18437.9	16814.1	14119.5	14488.2	14886.7	17499.6
C2 H3 Cl4 N4 O P3 S5	18407.3	27669.2	36340.7	21967.3	32750.4	18920.8
C5 H4 O3 P2	18395.1	16160.2	17609.4	18172.7	20633.8	20547.5
C3 H7 Cl O8 S2	18390.1	24949.5	14819.5	5047.12	30430.3	23695.9
C7 H17 Br Cl N10 O2 P3	18375.7	18337.5	9533.02	6085.81	10915.5	23147.1
C4 H N O2 S	18353.1	25769.4	19334.4	16888.3	31817.5	18887.6
C13 H4 N4 O4 S4	18346.4	21126.2	17089.3	19408.4	16434.1	18138.1
C2 H6 Cl N O12	18328.2	17015.4	14782.2	30528.1	27402.4	27905.3
sphinganine	18326.9	14295.1	15562.1	20714.5	16640.4	20468.2
Leu-Val	18304.3	25346.3	15578.7	223002	181595	178613
Negative_786.53969_4.735	18178.2	27676	41865.7	43114.8	29508	39832.7
C40 H66 N8 P2	18131	19625	18259.5	19186.8	18295.2	21314.6
Hexose	18085.3	21347.4	17047	17724.1	20218.5	17053
C4 H3 Br Cl3 O P3 S5	18065.7	19831.9	21148.4	16291.1	19338.3	14502.1
Positive_211.83142_0.866	18031.6	33911.5	42966.1	40781.3	36963.2	44215.9
L-(-)-Threonine	18004.8	17008.3	14330.1	82315.6	110857	84983.1
C51 H62 N2 O2	17980.7	11985.4	11803.7	14539.9	12109.9	15937.5
2,2,4-Trichloro-1,3-cyclopentenedione	17892.3	19990.1	11848.7	19655.1	22092.7	18884.3
C4 H6 N10	17880.8	17840.7	19656.3	19456.5	17636.9	14815.9
Ciclopirox	17854.5	16247.3	11469.5	12352.1	10227.1	16562.6
LEUCOMALACHITE GREEN	17837.6	13311.3	13640.3	16763.6	15933.9	15407
C2 H3 N5 O18 P2	17822.5	17773	15864.5	20665.1	15185.6	20403
C13 H30 N6	17785.3	21460.1	27015.6	16614.1	20406.8	22709.2
C22 H48 N6 O S	17764.8	11634.6	16030.6	12999.3	15452.4	16594.4
C9 H21 N3 O5 P2	17738.5	17968.8	15099.1	19248.5	14288.3	32132.8
C21 H26 N10 O S2	17655.6	17407.5	16720.6	18080	16466.3	21305.2
C15 H3 Cl2 O7 P S4	17583.3	16071.9	17738.7	14662.4	16320.1	14640.2
C3 H5 N2 O P S	17553	14848.6	15687.2	12631.2	13386	13840.7
C22 H41 N6 P	17520.2	11987.3	9506.26	16808.5	7339.57	12843.8
C14 H17 N6 P S2	17508.2	12825.1	10849.5	6970.94	10056.2	12682.6
C40 H85 N5 O8 P2	17507.1	8150.45	9940.38	8275.55	7322.17	16525.6
1,2,3,4,5-Penta-O-methylpentitol	17496.8	17795.2	15567.3	17482.4	16371.9	4977.88
syringol	17435.3	12516	18586.5	15496.4	17477.9	18222.9
Phenylacetic acid	17369	12448.8	18519	15392.4	17400.8	18112.8
C6 H6 N2 P2	17328.2	26802.6	25848.1	26041	28512.8	22687.1
C4 H5 N2 O17 P3	17313.6	13513.9	10582	9305.53	8811.16	10440.3
C4 H5 Cl4 N2 O7 P3 S	17276.3	17944	21623.4	15857.3	24650.7	13321.9
C15 H23 N6 O13 P3 S	17261.3	25837.2	26572.6	21807.1	22613.5	11869.7
Negative_843.5958_6.193	17257.6	19485.5	25148.2	18689.5	15666.2	19351.3
C40 H84 O12 P2	17240.5	24138	23445.9	15452.9	21128.8	27714.4
C43 H86 O6 S2	17223.7	12688.4	19604.2	12767.9	29883.8	9017.11
C5 H8 Cl N9 O2 S	17220.2	17107.8	14297.3	9104.25	10049	11287.4
Ubiquinone-10	17214.1	935.557	22070.4	5130.86	32461.3	25973
4-{[5-(Diethylamino)-2-pentanyl]amino}-4-oxobutanoic acid	17154.3	15348.9	17304.4	16796	16538.1	18604.9
C19 H41 N O2	17153.1	16993.6	13661.1	13647.8	9757.97	16354.7
C5 H5 Cl2 O3 P	17047.1	27340.8	19966.1	17257.8	16908.5	16529.2
Phenoxyethanol	17026.7	14679.4	14371.4	16476.5	15128	16411.7
C9 H17 Cl N10 O14 P2 S2	16964.8	20084.5	12957.5	8208.69	9794.67	15381.7
C11 H13 Cl N8 O17 S	16935.9	26971.9	33764.6	21822.1	23234.2	14094.5
Lysophosphatidylinositol	16838	18307.8	20501	23816.8	24203.1	27980.4
C22 H39 Cl N4	16831.9	21338.2	16237.2	14424.6	13631.8	16792.9
C10 H16 N8 O9 P2 S	16829.9	11893.7	10476	5000.75	4824.47	7538.27
C4 H15 N4 P S	16802.2	20619.1	15877.1	13600.2	15484.8	13691.7
Positive_105.94365_0.831	16750.4	15029	13478.8	13543.3	10801.3	14213.4
C16 H12 Br2 S5	16664.9	15642.5	19175.5	15541.1	16360.2	19435.9
C4 H2 N2 O11 P2	16597.5	13282.2	25216.3	18205	21956.7	19091.4
Positive_837.82902_6.364	16579.2	21815.9	21199.9	18771.9	17864.8	19340
N,N,N',N'-Tetraethyl-1,2-di(2-pyridinyl)-1,2-ethanediamine	16553.7	16176.7	10731.8	12516	17607.9	20279.9
C7 H17 Cl N O4 P S	16452.9	15464.1	13245.1	9408.45	9468.12	9370.62
4-(Heptyloxy)phenol	16437.9	13159.2	3996.29	3852.65	10065.3	15369.7
C13 H27 N2 O P3 S	16381.9	18651.2	20975.8	20995.9	23064.9	22551.4
2,3,4-Trihydroxybutanoic acid	16370.9	16023.2	17573.7	25000.5	22227.5	20539.7
C7 H18 N8 O S	16362.4	13999.9	15705.4	374.011	2783.24	3029.65
C18 H43 N4 P S	16278.7	6891.76	18626.8	9299.84	14719.3	3055.57
C2 H3 Br Cl4 N6 S5	16265.9	23811.4	28484.5	26678.6	22227.6	11460
Mesyl anhydride	16243.4	18318.6	44360.6	37583.2	31546	20709.4
C38 H77 Cl N7 O6 P	16227.8	1773.63	18303.8	10179.3	14455.9	13861.2
C6 H5 N8 O2 P3	16172.6	12269.3	8722.51	11364.8	10586.5	12064.9
N,N-Dimethylpregnan-3-amine	16169.4	27769.4	52872.4	33306.3	21312.5	49493.3
meprobamate	16117.2	17817.4	19360.1	20863.9	19934.3	28866.7
C11 H22 N8 O10 P2 S2	16084.7	25024.5	35273.5	39900.9	48006.8	10465.8
C83 H124 N9 O14 P3	16080.7	23580.6	26003	20015.8	28254.4	540.656
C8 H9 N2 O P S2	16053.5	11192.7	17229.8	17415.2	9329.46	17410.1
C8 H8 Br2 Cl3 P S4	16017.8	22668.3	33317.6	29743.6	34701.8	23109.1
C3 H4 Br Cl3 O10 S2	16004.5	27828.6	29302.5	26681	35321.6	19120.4
C H3 N4 O6 P3 S	15953.9	14737.8	4546.67	3752.33	4397.57	17633.5
C H2 Cl N4 O3 P3	15935.6	38814	25541.3	47079.4	23210.3	27697.5
C H Br Cl O13 P3 S4	15930.8	26821.2	29860.4	26607.2	32976.8	17634.4
C5 H6 Cl3 N2 O9 P3 S	15896.8	21012.3	23480.2	15993.9	21653.9	13142.7
C42 H71 N6 O P3	15797.2	15667.5	16554.1	15158.4	15614.8	17742.7
Negative_828.60477_6.183	15760.4	12757	8702.1	8082.49	12698	13845.6
C9 H24 N9 O5 P	15749.8	12133.7	5373.89	7334.53	6101.04	9136.1
C6 H14 N2 O5	15712	25219	17654.1	13402.5	11187.3	17342.3
C10 H25 P3	15703	15644.9	15682.3	13501.8	14174.3	13723.5
C3 H3 N O9 P2 S	15693.1	30510.5	19900.4	9593.66	26919.7	6645.27
C6 H4 N10 S	15633.2	12106.9	11635	8333.29	7626.44	12267
C5 H16 Cl N8 O17 P3	15626.5	20522	22329.9	13881.7	13183.1	13776.6
C6 H5 N8 O3 P3	15605.3	11138.1	11041.4	10725.4	12314.7	8313.74
UNII:U9H9OM3S75	15599.6	17552.7	20853.1	17010.1	16500.2	24354.3
C21 H37 N O2 P2	15596.7	16044.8	14717.8	18100.2	10263.6	13785.2
C41 H73 N2 O3 P3	15549.5	14761.3	11514.3	10312.8	10398.4	12837.8
1-[(Hydroxy{[(2R,3R,5S,6R)-2,3,4,5,6-pentahydroxycyclohexyl]oxy}phosphoryl)oxy]-3-(palmitoyloxy)-2-propanyl (9Z)-9-octadecenoate	15505.3	17110.9	13013.5	14119.5	13652.4	18346.2
C18 H39 N5 P2 S	15425.8	13792.8	12189.3	10674.7	11121.4	15234.8
C10 H10 N6 O3 P2	15422.8	11888.9	11431.6	6231.79	5556.84	8670.1
C H4 N4 O3 P2	15395	71662.2	56464	33699.4	47790.8	156049
C15 H22 O S3	15395	28602.5	15604.7	14146.3	13775.1	15096.4
C3 H2 Cl N O6 S	15305.2	8043.29	5356.5	35932.5	7254.02	22201.4
C5 H15 N5 O4	15292.3	16090.4	10234.6	14281.3	14925.4	16321.7
Tetradecyl hydrogen sulfate	15223.6	13090.3	13115.7	27608.3	16990.6	15034.3
N~6~-Methyl-L-lysine	15095.5	15784.4	2858.49	23211.9	20845.4	26380
C7 H10 Cl N8 O14 P3	15071.4	28617.1	28820.5	18553.8	26351.1	19174.4
C H3 Cl O8	15041.1	9240.25	11245.5	67814.4	9335.82	17416.5
Methyl (2-amyl-3-oxocyclopentyl)acetate	15011.7	12519.8	12365.7	12091.2	12454.6	14403
C38 H76 O P2	14997.1	20823.7	6903.76	8610.4	9852	19649.8
C8 H12 O11 P2 S2	14961.4	23690.4	28443.2	33790.2	35083.9	19922.1
C41 H85 N6 O2 P3	14894.2	5563.22	6308.24	8830.57	4574.97	2810.27
C35 H62 N4	14887.7	11339.2	16562	12848.3	16556.4	15100.6
C2 H P S5	14887	12675.2	9778.63	8203.29	8935.01	16313.2
C36 H68 O4	14882.9	16853.8	21024.7	15675.9	17406.3	17068.2
2-{Bromo[bis(4-chlorophenyl)]methyl}-5-[bromo(diphenyl)methyl]-1,3,4-oxadiazole	14858.4	19174.2	18118	9849.22	11777.2	12375.7
C43 H82 O13 P2	14852.4	18652.9	12010.8	15194.9	14762.7	11958.9
C10 H3 Cl4 N O3 S	14845.7	11687.1	14836.3	13079.6	15159.2	12642.5
C19 H41 N3 O6	14823	26802.8	36488.7	606.647	350.33	178.934
C4 H11 Cl N3 O3 P3	14818.5	11670.1	15944.5	8514.85	8751.3	9864.7
C53 H70 O2 S	14801	19552.4	13927.1	210727	380328	23934.9
C4 H Cl O10 S	14769.2	15718.1	17064.7	20737.8	20866.9	21300.7
C4 H7 N2 P S5	14749.2	13716.2	6788.11	3009.33	3497.53	16512.5
C38 H17 Cl O3	14745.2	494.135	411.599	8726.02	456.566	5948.99
monomethyl phosphate	14733.5	11786.2	14432.9	11332.2	10612.9	11202.9
C4 H Cl N3 P3 S	14643.1	28611.8	20826.7	11822.1	29077.8	16647.7
Tetradecyl methanesulfonate	14617.6	12834.6	10351.7	9716.36	11119.7	13837.2
C11 H2 Cl3 N S	14547.6	16861.9	13727.6	10108.7	10414.9	8078.06
DL-Cerulenin	14520.4	26921.6	14400.3	9529.68	13789.9	8987.19
Negative_845.56904_4.545	14489.8	17681.9	22595	17393.9	16589	21440.4
C35 H75 N9 O8	14455.9	9276.85	10238	13095.7	13241.5	16933.2
C19 H37 N3 O3 S3	14368.8	15907.1	9287.9	12610.5	20775.5	13277.6
C H N2 O7 P3 S	14364.8	17305.6	6717.05	15275	14475.6	14239.1
C14 H33 N4 O4 P	14346.9	7974.1	7296.37	12134.6	7525.43	9708.56
C22 H38 O S	14319.6	12150.3	6006.05	5667.09	3829.35	12504.7
C44 H70 O6 P2	14199.7	11817.9	11980.9	13618	11319.5	15786.8
C8 H12 Br O2 P3 S2	14185.8	15659.3	17270.5	2491.03	11830.5	14227.4
C11 H7 Cl3 O P2 S3	14168.1	13525.7	16905.8	14106.3	15306.5	22208.8
(2Z,2'Z)-2,2'-[(8-Hydroxy-2-oxo-2H-naphtho[1,8-bc]furan-4,6-diyl)bis(3-hydroxy-5-oxo-4-furanyl-2-ylidene)]bis[(4-hydroxyphenyl)acetic acid]	14163.2	15185	18569.3	25864.5	16900.9	21000.4
2,2,6,6-Tetramethyl-4-piperidinamine	14132.5	10538.6	7782.16	4042.57	3844.97	4386.95
C H3 Cl4 N8 P S5	14123.7	20398.8	26454.4	20874.1	23720.4	8277.71
Negative_137.92323_0.73	14122.9	15879.3	15170.3	17131	18222	19250.5
C4 H8 Cl N3 S2	14116.8	12800.7	12147.7	7673.02	7117.17	10510.3
(2R)-3-(Icosanoyloxy)-2-[(9Z,12Z)-9,12-octadecadienoyloxy]propyl 2-(trimethylammonio)ethyl phosphate	14054.1	2631.5	692.654	9729.84	1931.39	10221.9
Ginkgoic acid	14031.7	14528.1	8364.06	7828.75	5435.55	17943.7
C37 H78 Cl N7 S2	14009.3	781.733	12814.5	6807.15	1785.4	19667.5
C4 H14 N P3	13960	11749.7	12473.9	23370.1	17086.8	24128.3
C6 H15 N8 O13 P3	13928.3	15557.6	14666.9	10731.4	13063.1	11848.7
C33 H78 N9 O10 P	13916.6	17142.6	19662.3	26839.5	22034.7	1021.59
C5 H12 N8 O11 P2	13889.1	15693.7	14497.7	11052.6	14799.5	10978.4
C34 H72 N9 O7 P	13888.3	37229.5	37102	51949.9	46465.1	1459.95
C8 H18 N3 O5 P	13871.8	33227.7	39570.7	47014.3	20340.1	19530.6
C7 H16 N6 P2 S	13862.1	12915.6	18720.8	12722.6	14131.5	15444
3,4,5-Tribenzoyl-2-methyl-2-phenyltetrahydrofuran	13850.5	13156.9	16950.6	14929	13441.8	11836.1
C H Br Cl4 N6 O6 P2 S	13820.1	16133.6	21650.1	19513.8	25492.3	13449.3
C24 H48 N3 O P	13802.7	16635.7	18453.8	1733.51	23060.2	14657.2
C21 H43 N7 O2	13802.7	2462.92	1955.47	11249	307.242	14657.2
(2R)-3-{[(2-Aminoethoxy)(hydroxy)phosphoryl]oxy}-2-hydroxypropyl (5Z,8Z,11Z,14Z)-5,8,11,14-icosatetraenoate	13801	20514.6	18055.2	37014.5	24988	43253.1
C40 H72 N7 O8 P	13791.3	8476.61	5014.61	7122.67	8136.76	8423.11
Butoxytriglycol	13781.6	6764.67	7133.51	9199.34	8139.58	7471.53
C38 H81 N5 O7 P2	13751.7	198266	161055	37613.5	94312.5	21661.7
C11 H6 Cl2 O S3	13727.8	11847.1	22119.8	9513.47	14566.2	31261
C4 H13 Cl2 N8 O5 P	13685.7	15747.6	15273.5	18696.4	17091.2	18841.9
C13 H22 N3 P	13682.2	12450.7	11676.8	8513.27	12482.7	16818.5
C52 H74 N2 O9	13680	16391.3	14555.1	13462.8	14294.9	9784.33
Positive_547.64954_0.868	13669.5	14938.2	23643	24590.1	32986.9	8189.78
C6 H Br Cl3 N2 O5 P3 S4	13662	24806.6	27727.7	28739.7	28469.1	23196.6
C47 H64 N10 O	13649.2	10632.5	9933.14	8259.81	12238.6	14747.5
Tetracyclo[16.1.0.0(2,9).0(10,17)]nonadeca-2(9),10(17)-diene, 19,19-diphenyl-	13645.5	8780.85	5963.14	3719.67	3679.83	16343.4
C26 H44 N O8 P	13639.3	9760.39	10132.8	9969.77	6194.68	12969.3
C H N7 O2 S2	13631.7	15409.1	19234	27917.6	18577.1	19630.3
5,6-Dihydroretinoic acid	13630.6	10688	9102.2	11802.1	12216.1	19352.9
C16 H29 N O S	13593.6	13548.2	12968.9	11389.5	13591.4	13474.2
1-Phenethyl-5-pyrrolidin-1-ylmethyl-1H-tetrazole	13589	16545.9	13700	12166.3	15666.6	14907.4
N-(2-Diethylamino-ethyl)-3-nitro-benzenesulfonamide	13565.5	16967.4	14612.9	12203.6	12520.4	13348.7
Dinoseb	13534.2	15072.9	13139	12155.1	12936.5	15399.5
C46 H71 N5 O P2	13500.2	1251.48	1126.44	15607.2	1342.64	1281.76
C4 H4 N O4 P3 S2	13496.8	43469.4	38098	11343	50047.6	16105.2
C7 H5 Cl N5 O2 P	13470.5	10786.7	9577.05	8016.58	6692.31	8975.15
C47 H82 N2 O2 P2	13445.4	1227.48	832.685	5394.56	1490.87	5611.34
C3 H3 Cl N O3 P3	13443.4	18445.6	16356.6	12565	26117.7	10448
Phosphorazidothioic difluoride	13405.4	16589.7	17785.5	11949.9	16278.8	13246.6
C21 H30 N3 O3 P	13383.9	8986.89	8185.07	12937.6	8121.39	14225.4
C19 H28 N8 S	13360.1	24989.5	23587.7	23495.3	24168.2	30654.5
C5 H2 N8 P2	13352.6	16007	15070.3	15600.8	15704.2	15297.2
1,3-Benzothiazole	13332.4	12617.3	9976.59	10215.9	12181.8	15279.3
C H2 N4 O3 S4	13332.3	11641.9	3820.53	14452.9	14935.5	10899.3
C35 H79 N5 O9 P2	13318	11945.7	422.909	916.927	658.302	123.441
C14 H30 N6 O3	13292.5	10486.8	10047.8	13082.1	9408.14	13025.3
Selenophene	13270.4	21857.8	28438.1	23354.8	35533.7	17713
C50 H70 N2 O2 P2	13269	16717.5	13619.3	12537.4	12194.3	14508
C3 H4 Cl2 O4	13245.5	6593.53	6231.27	16948.4	5769.67	16916.3
C42 H77 N6 O11 P	13221.5	27475	16442.9	18421.9	24050.3	37785.7
C12 H26 N3 P	13189.6	28857	37827.2	631.864	242.485	241.58
C4 H N8 O3 P3	13155.3	9924.18	7124.14	8372.89	9467.86	11715
C6 H20 Cl N8 P3 S	13141.4	14667.1	12605.9	11780.8	13153.5	15213.4
Negative_801.58961_6.211	13136.8	13925	13448.6	11279.3	14750.4	18851.4
C4 H12 N2 O7	13126.6	10486	13277.5	9944.14	14840	11041
C36 H73 N7 O6	13096.6	1058.05	16957.9	12287.3	2416.49	9048.34
C5 H18 N9 P3 S	13049.3	16909.6	14435.2	23914.3	19386.1	24709.1
C2 H4 Cl O P S4	13003.6	25323.1	22497.2	22652.2	24319.2	18608.1
C7 H12 Cl3 N4 O16 P	12997	22322.1	23615.8	16552.7	25871.4	17652.5
2H,6H-Pyrano[3,2-b]xanthen-6-one, 5,9-dihydroxy-8-methoxy-2,2-dimethyl-7-(3-methyl-2-butenyl)-	12970.1	3137.33	3135.87	8474.16	3192.31	12747.6
Octachloronaphthalene	12873.5	45692.1	33837.8	31233.4	32022.2	21601
Positive_172.90846_0.996	12868.8	12932.3	10145.5	12415.2	9405.37	12614.7
C3 H3 N6 O11 P3	12861.7	18130.3	19758.1	20882.2	22785.1	15742.6
C19 H22 N5 O16 P	12856.2	15592.3	15303.2	14913.4	11355.7	11789.9
3D,7D,11D-Phytanic acid	12844	8093.01	12181.2	10474.1	6432.65	13765.5
C H3 Cl3 N6 O2 S2	12757.9	10333.1	11471.8	5242.7	9219.08	12456
C36 H52 O3 S2	12757.4	11443	11237	9436.21	8853.77	11995.8
C9 H10 Cl N8 O7 P	12746.6	11266.9	10248	6828.45	7487.34	9010.17
C15 H22 N10 O3 S	12718.5	21870.8	15191.8	12591.8	11679.5	20158.1
C20 H36 N6 O2	12707.6	1016.26	1540.08	15141.9	246.535	6668.45
C27 H39 N3 O6	12698.2	928.538	1796.05	3099.84	637.498	4684.73
Positive_130.92238_6.554	12689	10434.2	7852.1	12020	3670.38	14559
C40 H71 N6 O P3	12672.3	14923.4	13016.1	14033.9	11088.8	13087.8
C47 H68 O7	12672.3	28749	36545.1	14953.3	21874.6	30649.4
C4 H3 N2 O P3	12665.4	38483.9	49630.6	44790.8	22943.1	26079.3
C30 H34 O2	12654	4777.29	5332.12	8419.1	5681.24	13911.7
Salvinorin A	12618.4	10924.7	8568.9	7873.4	8572.12	12507.3
C34 H32 Cl N S2	12608.4	15028	68982.4	47050.3	18065.7	15897
C28 H50 N2 O11 S	12607.1	15956.9	14808.8	13374.3	15658	14679.1
C33 H74 N7 O8 P S	12603	14435.7	12520.1	11729.8	11172.3	303.399
1-(4,6-diamino-1,3,5-triazin-2-yl)guanidine	12591.5	13066.7	10710	86352.8	78829	97296.8
Positive_147.9279_6.311	12588.8	18802.6	19950.7	10082.2	19837.7	10834.7
C3 H10 N10 O13 P2 S2	12558.2	11926.4	8119.32	9865.34	9940.19	9600.58
C H Br Cl O14 P3 S4	12547.5	16473.1	19205.6	20038.4	18641.5	12590.1
C3 H6 N2 O5 S3	12524.4	10704.1	12115.6	9063.88	9882.08	9411.87
C48 H77 N3 O6	12483.9	16604	6567.76	4683.56	7030.93	8379.29
C H3 Cl2 O5 P3 S3	12453.1	16368.6	11325.7	6720.69	11807.5	10744
C40 H78 N10 O2	12352.2	9131.72	10713.8	8188.07	10165	9305.2
C10 H4 Br2 S4	12330.7	19607.9	20198.9	25777.3	25959.9	19016.6
C22 H36 N2 O4 S	12328.5	12684	10063.7	8951.6	9819.63	13021
C3 H9 Cl N6 O16 S3	12324.9	15791.2	13953.5	10361.4	13430.4	12825.9
Negative_663.96915_0.779	12324.1	16400.3	15950.9	12333.2	13010.3	8155.11
C4 H2 N4 O5 S4	12285.4	21459.4	20661.8	22873.3	24486.3	17480.1
C2 H8 Cl N5 O3 S2	12276.9	12267.5	11881.3	22516.3	17370.5	17583.4
1,3,4,6-Tetra-O-acetyl-b-D-fructofuranosyl 2,3,4,6-tetra-O-acetyl-a-D-glucopyranoside	12210.9	13861.6	20200.5	22919	11963.3	17534.6
mebutamate	12205.3	13506.1	11815.2	16008.4	14169	20267.2
C22 H55 N9 O3 P2	12204.1	7951.6	8989.37	12105.5	8699.61	11880.1
C43 H82 N3 O3 P3	12189.2	25693.6	16874.5	15913.1	33034.4	2483.75
C7 H17 O15 P S	12150.9	14304.7	13664.4	10400.8	14391.7	10100.1
C14 H4 O15 S2	12134.1	14480.1	12174.5	11890.2	10974.1	12143
C52 H80 Cl2 N2 S	12124.1	18021.1	21432.9	4023.25	18106.3	4450.98
C33 H74 N9 O8 P	12115.2	9379.02	7374.59	9585.42	10004.9	6364.39
C10 H Cl4 O P S5	12079.9	18863.3	23052.4	28596	30443.4	19442.1
C20 H33 Cl O2	12078.8	11288.1	4770.13	8331.51	5128.07	20980.4
C H Br2 Cl2 N2 O8 P3 S4	12069.5	18127.6	23973.7	25447.6	25422.1	19982.8
(13Z,16Z,19Z)-13,16,19-Docosatrienoic acid	12038.8	11044.4	10843	10934.1	10941.7	13476.9
Negative_505.68298_0.737	12020.8	17344.5	21248.9	18734.3	22215.2	12170.7
C21 H42 N5 O3 P	12015.4	7705.39	8697.23	12038.5	6598.34	11568.8
C6 H20 Cl N6 O14 P3	12002.9	18676.1	33389.6	37725.9	26432.9	10685.2
C6 H9 Cl N O3 P	11998	16158.9	9227.12	12714.1	16016.4	9788.48
C51 H81 N4 O2 P	11987	12836	13180.2	5696.35	12792.9	5436.58
C4 H15 Cl2 N8 O15 P S3	11971.3	12597.9	7339.85	3475.92	6368.15	15515.5
C2 H3 Cl2 N5 O	11962.2	9302.41	12102.2	8531.14	8515.86	12153.9
UNII:GE16EV367Q	11903.8	10722.1	10185	6543.56	6215.71	12692.8
C13 H19 N O P2	11875.1	15552.9	14488.8	25526.4	16823.9	20367.2
C5 H8 Cl N2 O4 P	11871	9646	7477.16	4594.29	5536.02	5889.72
C53 H85 Cl O2 P2	11867.2	13790	7765.81	21132.4	13216.9	1491.73
C17 H19 N4 O16 P	11859.3	14599.2	13320.2	15039.4	9612.42	14147.5
C32 H5 N7 O15 P2	11848.7	21263.1	24869	12421.1	22455.5	364.787
C H4 O4 P2 S	11833.6	11474.4	9582.8	9569.38	8396.92	9764.43
C44 H74 N8 O	11833	4671.68	3012.01	6579.39	5551.48	4847.97
C10 H20 Br N6 O15 P3	11821.5	12914.7	7115.57	3532.26	6284.28	10744.3
Positive_179.15192_3.866	11818.3	13224.3	26747.6	43720.8	14468.7	10203.6
Negative_195.87936_6.518	11796.1	9644.62	10896.1	12393	9638.68	10397
C H3 N7 S2	11774.5	14083.8	12118.6	10581.4	12175.5	13089.2
C10 H22 N6	11769.2	6620.27	6952.95	11729	9168.69	12292
zindotrine	11757.6	13726.9	14916.4	15816.5	13983.6	19907.7
C2 H2 Br N O3 S2	11756.4	13658.7	13119	9617.91	10193.4	9389.5
Homo-L-arginine	11738.8	7531.86	6152.62	3668	2814.76	6705.72
C28 H43 N3 O S2	11706.6	9785.83	14558.5	6844.66	5917.01	7698.24
C35 H82 N10 O16	11706.1	9715.93	2836.62	5351.59	10520.9	13546.7
O-(Carbamoylamino)-D-serine	11675.2	10042.1	17388.8	11403	9317.06	8881.34
C7 H3 Cl4 O3 P3 S5	11673.6	23273.3	28793.8	26046.7	29994.6	20031.9
C50 H85 Cl N O3 P S	11654	16347.7	13213.2	7619.37	10498.3	13372.6
2-Chloro-1,3,2-benzodioxaphosphole	11647.8	11601.9	12006.1	4764.61	7594.64	15773.4
Itaconic acid	11646.1	15381	15113.1	16654.7	22483.9	24696.8
Negative_181.87785_3.759	11621.4	13119.8	7304.05	7035.88	5209.85	16154.2
C10 H20 N6 O5	11603.2	9737.66	22248.6	24750.2	6371.79	6497.5
C46 H76 N O3 P3	11599.2	4850.82	5590.51	4911.96	8091.65	7083.89
1,2,3,5,6-Pentakis-O-(trifluoroacetyl)hexofuranose	11568.7	12463.5	7827.48	4989.02	6358.17	7440.74
C7 H2 Cl4 N4 O P2	11561.1	20439.3	23379.1	30278.3	33154.2	19874
1-Isothiocyanatononane	11556.5	12030	6492.29	4374.94	4928.86	14136.8
1-(tert-Butoxycarbonyl)piperidine-2-carboxylic acid	11502.5	14026.5	12787.5	8870.88	13680.9	10332.8
C6 H Cl O12 S5	11493.3	14524.6	15889.8	13232.2	16430.8	10055.7
C H4 Br N2 O P3 S2	11395.1	20013.4	14253.6	20058.7	25615.6	18527.6
C5 H3 O9 P3	11375	16883.5	17690.1	18337.9	20203.3	14665.5
C10 H19 Br3 N6 O5 P2 S2	11292.5	13762.6	11608.1	6032.59	8152.82	8123.97
C37 H36 Cl2 S3	11291.7	21111.9	9303.87	5706.39	4680.12	7084.25
C22 H37 Cl N4	11286.9	11699.9	9273.78	6594.91	5218.62	12032.9
C3 H3 N2 O7 P3 S	11243.6	13475.5	6386.42	5838.92	18006.6	11217.9
(2R)-1-[(Hydroxy{[(1s,3R)-2,3,4,5,6-pentahydroxycyclohexyl]oxy}phosphoryl)oxy]-3-(palmitoyloxy)-2-propanyl (11Z,14Z)-11,14-icosadienoate	11243	8780.75	9055.87	10708.6	10872	10012.4
4,6-Bis(diethylamino)-1,3,5-triazine-2-carbonitrile	11237.4	9450.02	9072.13	7009.47	7371.92	9431.68
C5 H8 Cl N3 O5	11235.4	9330.64	9090.26	6966.58	5626.24	7520.52
C10 H2 O S3	11203.7	9676.18	8052.44	4900.38	9296.21	7419.79
C9 H19 N7 O2	11202.2	6470.77	10722.2	7111.84	10080.3	7878.87
C6 H5 Cl N6 O17 P2	11201.4	21021	10183.2	4465.74	12372.7	22192.4
Positive_561.57948_0.861	11153.6	12221.1	11866.1	11390.6	10828.9	6695.39
C8 H16 N3 O4 P	11142.5	11361	10765	12894.8	10391.9	2675.24
C5 H Cl2 P3	11136.3	8589.72	4141.83	5302.25	2895.4	11811.1
1-(2-Chlorobenzyl)-2-(phenoxymethyl)-1H-benzimidazole	11136	5230.59	7713.54	6622.07	7186.58	10817.8
C3 H7 Cl3 N4 O3 S2	11132.1	40083.3	56788.6	73172.3	88504.6	30635.6
Benzhydryl ether	11075.5	10262.4	9604.05	13185.6	7273	12216.3
C17 H37 O P S	11050.9	9946.87	9922.41	9260.34	8148.8	11472.7
C3 H4 Cl O15 P3 S	11043.9	19083.9	22419.9	17708.1	22415	11934.9
Triethyl orthoformate	10995.7	7675.71	15400.1	3731.47	15766.5	11050.8
Indoline	10976.9	10276.5	8654.46	69454.7	84705.5	63968.7
C10 H23 N4 P S	10974.3	9950.96	8915.65	13231.1	11059.9	11982.8
C38 H80 N7 O8 P	10971.1	10525.6	10323.8	5611.17	8150.87	7059.68
Stearamide	10943.6	11302.9	11485.1	10064	13985.7	11330.4
C12 H10 Br2 Cl4 N8 O8 S	10937.3	11448	9305.71	6842.04	7405.39	7170.62
C4 H2 Cl N5 O S	10930.6	9243.86	9163.62	10828.1	3425.5	10884.4
C2 H8 Cl N6 O18 P S2	10913.7	14562.7	15347.2	11610.8	19284.6	11734.9
C15 H32 N6	10911.1	12277.1	13102.3	9765.28	12306.7	12323.5
C3 H2 Br Cl N O6 P3 S5	10864.2	19013.6	25043.9	20923.9	20749.3	20163.6
Positive_791.40232_3.586	10864.2	10206.9	13477.2	3866.12	12198.2	17570.6
C12 H18 N4 O2 S3	10827.7	8154.05	5487.66	6705.84	8974.12	5455.74
Positive_547.64934_0.913	10802.2	4489.67	12091.1	14280.3	17264.2	6721.33
C44 H69 N6 O P3	10754.7	1539.34	1733.63	1191.38	8583.8	10513.8
C4 H3 Br2 Cl3 N2 O7 P2 S3	10749.4	17533.6	22830.5	17975	23033.1	12744.2
C2 H2 Cl N6 O2 P S	10737.2	15864.4	5844.86	41125.2	9815.55	17570.5
C4 H4 N2 O S4	10705.5	17361.3	23361.1	24222	21232.4	19533.6
C2 H8 Br Cl4 N10 O17 P S	10704.8	10972.3	10337.6	6527.37	7249.88	8513.06
C22 H47 N2 O3 P	10703.3	12403.9	10674.2	11262.2	9593.12	8145.7
C40 H67 N3 O9	10663.9	9965.09	7641.14	7517.61	6479.36	318.875
C62 H68 N4	10644.7	10388	6809.38	11005	10994.8	7162.17
C49 H33 Cl N P	10625.9	21378.6	25347.8	6542.73	124833	161051
C22 H40 N5 O2 P	10609.6	7584.23	12977.5	17127.3	12642.6	14046.6
Positive_677.91512_3.585	10573.9	10087.6	12667.8	18545.9	11684.7	15308.5
C4 H3 Cl4 O12 P S5	10562.9	15188.2	23154.3	19957.6	21880.3	8746.59
C13 H5 Cl2 P3 S3	10553.9	12221	13060.5	10435.9	11426.6	11415.2
C H2 Cl2 N2 O10 P2	10538.3	13893.7	14172.3	14895.3	17807.3	17201.3
L-(-)-Serine	10524.6	9889.84	11082.6	72109.4	56727.4	60397.3
C7 H16 Cl N4 O18 P3	10520.2	18573.9	26933.1	29902.5	27302.9	12172.3
C3 H Cl3 O6 P2 S4	10513	15534.3	20699.2	19850.8	23013.6	14410.9
C7 H21 N6 O5 P	10462.3	15552.5	10160.4	8246.37	7347.09	11340.2
Positive_762.58776_4.255	10453.6	1714.76	4548.77	5506.32	2067.97	2966.85
C4 H Cl N P S2	10446.2	14070.9	12360	6752	15643.8	7803.94
C4 H9 N6 O14 P S5	10441.7	16641.3	16430.2	13902.1	11680.3	9512.54
C2 H2 N8 S5	10390.6	7497.5	6992.54	5851.82	6245.35	9701.13
C29 H41 P	10382.6	8976.17	8560.95	5740.2	9567.61	9509.74
C7 H4 Br P S3	10375.2	16491.8	19756.3	24945.9	26486.2	17386.6
C6 H17 N10 P	10345.9	10117.4	7803.59	9735.26	7994.78	9844.08
C3 H11 Cl3 N8 O17 P2	10341.5	8563.27	1988.23	2582.58	1770.13	6861.01
2,4-Dihydrazino-6-methyl-5-nitropyrimidine	10340.8	10380.8	11221.1	113978	134323	74790.6
C43 H89 N8 O4 P	10339.1	9462.35	3724.38	6038.8	1357.76	5640.85
C4 H2 N4 O3 S	10336.9	12742.1	9736.63	10148.1	9231.95	8877.15
C17 H37 O3 P S	10336.3	4087.49	4067.84	10451.4	3418.5	8687.53
C6 H8 N O6 P	10326.3	37325.8	21251.1	11118.8	33703	15127.7
C14 H4 O3 S2	10308.5	16584.5	23003.2	34871.9	24074.7	12873.2
C37 H87 N8 O10 P3	10296.5	11917.3	15379.3	16777.4	16104	20540.6
Negative_133.92914_0.877	10289.3	5679.36	17509.2	14070.1	12304.1	4635.2
C4 H14 N6 O4	10276.1	11483.7	3705.94	8095.79	9393.67	9107.01
Positive_766.56786_4.11	10259.5	13637.8	9315.22	4092.2	12623.1	7334.26
C6 H6 Br Cl4 N2 O3 P S5	10250.2	14811.4	11594.7	12184.1	22279.2	9567.85
C20 H40 N O6 P	10205.6	10088.1	8223.17	6915.85	7589.27	10861.8
C H Cl N8 O2 S	10201.5	10004.8	10237.4	7715.6	5513.54	5477.18
C7 H17 Cl4 N8 O16 P	10166.7	18418.9	18960.7	13669.7	23799.7	10442.4
C35 H76 N9 O10 P	10158.9	6657.6	1993.86	31266.1	10143.3	14855.5
Isopropyl N~2~,N~6~-diisopropyllysinate	10158.2	6417.4	9682.93	107395	100106	73793.8
C7 H8 N3 O16 P3 S	10140	11278.6	10917.8	13379.6	10021.7	11403.9
C3 H5 Cl4 O13 P S3	10109.2	7926.87	17064.3	14320.3	15343.5	9888
Positive_515.66753_0.864	10098.4	22964.3	63146	15892.2	19780.5	11014.1
1,1-Dimethyl-3-(2H-tetrazol-5-yl)urea	10096.8	6445.28	7268.09	6119.65	6793.19	6820.79
C27 H51 N6 O2 P3	10087.7	10585.6	9784.99	12087.5	12182.8	12575.9
1-(1Z-hexadecenyl)-2-hexadecanoyl-sn-glycero-3-phosphocholine	10082.1	754.152	2192.39	14028.7	822.44	380.178
(2R)-3-{[(2-Aminoethoxy)(hydroxy)phosphoryl]oxy}-2-[(1Z,11Z)-1,11-octadecadien-1-yloxy]propyl (5Z,8Z,11Z,14Z)-5,8,11,14-icosatetraenoate	10053.7	9766.75	7444.65	10659.6	15522.9	5497.25
C36 H75 N6 O8 P	10052	10330.1	987.321	49469.7	35230.8	1183.68
C H Br2 Cl N O9 P S	10025.8	15231.5	19650.1	18685.5	23184.1	14388.9
C3 H4 Cl N10 O17 P S	10020.4	9546.28	12416.3	9905.89	12818.5	8812.76
Benzenepropanoic acid, .alpha.,4-bis[(tert-butyldimethylsilyl)oxy]-, tert-butyldimethylsilyl ester	10009.1	10300.2	9406.86	8234.34	9651.07	11257
Negative_655.93902_0.779	10003.8	15268.1	10434.3	8186.71	7825.51	9861.69
C42 H64 N2 O5	10000.6	5643.57	6105.25	8507.35	6131.75	9579.95
Valylvaline	9997.44	9300.61	10281.6	49304.1	46895.8	54840.8
C46 H78 N O P3	9986.2	23789.8	17180	5981.17	14684.4	18345
C9 H11 N8 O13 P3 S5	9983.21	10105.8	10192.3	5751.19	8791.78	7970.62
Negative_621.91981_0.783	9968.49	12890.4	5188.51	3489.16	4493.29	16425.4
C4 H8 N4 O6 P2	9965.53	7591	5161.39	6861.98	6274.14	7471.86
(2R)-1-[(Hydroxy{[(1s,3R)-2,3,4,5,6-pentahydroxycyclohexyl]oxy}phosphoryl)oxy]-3-(palmitoyloxy)-2-propanyl stearate	9939.15	15684.4	5496.4	5477.51	6691.09	12204.3
C12 H21 N2 O P	9877.92	8728.61	7004.78	7346.8	7749.3	9533.13
C H3 Cl3 N4 O S5	9840.51	14708.9	14305.3	22177.6	25038.8	17146.2
C49 H82 Cl N5 S2	9837.42	1914.3	1287.42	1304.4	8545.47	10729
C16 H35 N4 O3 P S	9821.13	9731.78	8715.73	8133.44	8671.99	11452
C4 H7 N3 O2 S4	9810.12	9792.02	10241.5	23549.9	22319	23745.6
C6 H Cl O9 S	9796.08	5737.3	15070.2	24304.8	7364.46	8425.76
C H3 N P2	9793.6	8460.88	5927.21	6835.2	4236.76	6271.48
C35 H80 N7 O6 P3	9788.8	22214.8	15263.4	33958.2	14876.2	10454.7
C15 H44 N9 O2 P3	9783.13	9920.19	8421.2	7993.22	9566.44	9893.1
DL-Histidine	9753.95	7752.14	7284.31	155168	354688	181065
C H Cl2 N6 O P3 S	9741.29	6676.6	22521.7	13955.8	3991.36	17270
C33 H39 N O8	9721.3	8885.85	10175.2	7109.33	11004.4	9154.14
C11 H7 O P3 S3	9715.01	8142.17	7507.17	5207.85	5960.99	9003.38
C9 H13 N7 O7 S	9704.57	10928.3	11536.1	9451.6	8642.42	11427.3
C2 H7 Br N2 O S	9652.36	17759.3	14296.8	6246	13607.1	10581.2
C5 H3 N O4 S	9623.16	10830.1	10759	6528.56	10145	9698.69
C H2 Br3 Cl2 N8 O4 P3 S3	9618.22	19053.5	17421.4	8293.62	9489.46	10027.1
C47 H90 O4 S4	9600.54	8047.64	6812.78	4923.35	8493.03	9376.31
Dimethyl(2-methyl-2-propanyl)silyl N-[dimethyl(2-methyl-2-propanyl)silyl]valinate	9573.69	9698.75	5563.65	7024.46	5432.98	14132.2
C6 H19 Cl N6 O10 P2	9566.3	4934.93	2726.39	3737.56	2784.88	10350
O-{[(2R)-2,3-Bis(stearoyloxy)propoxy](hydroxy)phosphoryl}-L-serine	9566.18	9123.67	10496.7	19430.5	11231.9	13874.5
C26 H44 O S	9559.37	10521.9	7514.46	5371.39	5449.38	9753.74
C12 H24 N6	9551.04	9641.65	8668.51	8099.69	7313.61	8045.1
2-[2-(Benzyloxy)ethoxy]ethanol	9535.16	10448.9	13573.8	9204.37	11106.9	11152.7
C42 H71 N9 O5	9531.82	15396.7	11027.8	14899	24086.5	2220.91
C47 H67 N10 O4 P	9527.6	12492.8	13499.2	24834	17189.3	12957.1
C7 H3 Cl2 N3 O S4	9515.75	9723.75	9162.7	6095.82	6011.96	4445.19
C8 H8 Cl2 N4 O6 P2 S2	9515.46	12876.8	23159.9	17299.3	18753	14519.6
Positive_155.87013_0.867	9503.94	13982.2	13157.2	7634.71	6873.01	12322
Negative_669.9557_0.78	9489.78	13007.3	7401.1	5417.27	6384.32	4574.5
C34 H72 N9 O8 P	9483.62	4332.91	3413.06	7085.99	5080.33	3172.2
C H4 N O11 P3 S2	9474.31	8897.82	8173.23	5657.82	7848.23	7832.79
1-(4-Morpholinyl)-1-octanone	9469.49	14458.4	16717.3	886792	937828	291057
Methyl (E)-N~2~-[(dimethylamino)methylene]-N~5~-{[(E)-(dimethylamino)methylene]carbamoyl}ornithinate	9420.47	12110.5	16669.3	15671.7	8544.04	7034.18
C13 H4 N3 O18 P3	9404.93	8440.47	8975.06	11481.1	7190.61	11539.5
C H4 Cl3 O8 P3 S4	9378.11	14304.3	19043.2	19308.2	20424.2	15589
C2 H O5 P3	9351.65	12871.7	13172.9	12060.7	16977.1	7472.46
C42 H69 N9 O5	9314.17	23205.9	18350	14390.8	20747.9	16416.8
C15 H29 P S3	9311.62	9837.55	11432.8	4101.63	5056.5	4142.87
C43 H74 N2 O9	9307.97	4305.09	7638.83	3267.24	3155.47	10375.4
C25 H6 O5 P2 S3	9270.64	11398.7	9689.75	8588.9	7567.32	9604.38
C43 H84 N3 O9 P	9266.68	17360.9	10882.2	4532.29	11817.3	16717
C5 H2 N9 O P3	9261.28	10655.7	9372.49	23290.1	29192.8	28372.4
C3 H8 Cl P S2	9255.39	5653.09	5295.43	6278.34	5502.34	4371.48
C37 H85 N8 O10 P3	9250.13	13974.5	9897.62	12554.5	12491.6	9601.78
C9 H24 N5 O2 P	9240.57	12027.5	17546.8	46380.6	37709.5	15684.6
C4 H2 Cl O7 P3	9227.31	10340.5	18800.8	17389.8	13793.7	10245.5
O-(Hydroxy{2-[(9Z,12Z)-9,12-octadecadienoyloxy]-3-[(9Z)-9-octadecenoyloxy]propoxy}phosphoryl)-L-serine	9220.13	5865.33	9440.75	9481.61	9624.99	293.731
C5 H10 N8 O4 S	9218.53	8930.25	8366.62	6400.11	5989.25	11011.4
2-Amino-6,7-bis(cyclohexylmethyl)-4(1H)-pteridinone	9212.38	8332.65	7671.89	7303.43	6549.93	9152.68
C20 H44 N2 P2 S	9200.6	15507.3	27124.5	23964.7	12275.6	14847.8
C22 H41 N9 O2 P2	9187.82	8958.06	9860.04	15604.3	13263	13522.2
Negative_842.58461_6.177	9170.55	7849.57	19952.8	3467.21	6296.58	4821.39
C5 H12 N O8 P	9162.72	9410.94	10065.9	16906	18664.8	17807.8
C H2 Cl3 N O9 P2 S5	9148.7	14003.7	18151.1	16038	18684.1	11674.4
C4 H5 Cl2 N4 O P3 S	9131.9	9862.91	9777.11	9778.71	9413.23	10596.2
C3 H4 Cl2 O5 P2 S5	9121.78	13692.7	15546.8	20372.3	18155	13149.5
C9 H18 N5 P	9121.26	11123.3	12401.6	13302.4	11229.7	16230.6
C37 H80 Cl N9 O3 P2	9118.05	5998.32	4932.36	1861.38	6270.82	11468
C21 H35 N2 P S	9115.43	9053.55	7944.8	7483.13	7529.55	8669.62
C5 H3 Br Cl3 O9 P3 S5	9114.77	15808.7	21358	20991.2	22711.2	10064.9
C19 H39 Cl P2	9108.37	10413.9	5490.44	9742.54	9158.19	14986.9
C33 H64 N8	9102.13	10178.3	5987.04	4892.18	4181.81	11725.6
C31 H73 N9 O17	9098.29	11332.3	10116.3	10291.5	9399.31	11178.8
C33 H77 N8 O8 P S4	9086.43	11163.8	5981.24	4542.45	7389.06	7885.94
C18 H40 N2 O2	9067.7	5228.11	6403.98	5528.1	4337.06	7969.92
C10 H7 N6 O14 P3 S3	9064.82	11323	9942.67	12886.5	12703.7	13004.5
(E)-Ferulic acid	9050.25	4945.3	33091.8	71399	10617.4	6884.04
UNII:X3FZE77O60	9048.13	8280.87	9136.17	8924.66	8165.87	7392.88
C19 H47 N9 O2 P2	9029.89	5179.6	8451.3	8240.13	5045.28	16373.2
C7 H11 Cl3 N2 O11 P2	9025.02	12293.9	22693.1	21423.5	27524.6	10145.4
C45 H79 O6 P3	8984.15	10123.1	8468.49	8347.71	11734.4	16010.5
C12 H24 N2 S2	8978.55	29085.3	28976.1	19941	14115.5	33223.3
C12 H2 Cl3 N6 O15 P3	8954.72	10093.2	11751.3	5815.03	6060.22	7014.09
C2 H4 Cl P3	8917.45	8088.13	7185.4	5505.03	6596.48	9766.04
C16 H32 N6 O2	8908.4	8500.8	6967.3	8695.76	5717.44	8684.47
Negative_447.72425_0.738	8905.54	7261.53	14127.8	16295.5	21206.7	12424.5
C4 H3 Cl4 N7 S	8898.03	9812.01	9448.47	5254.1	9242.51	9210.33
C15 H5 Cl N2 O	8862.42	9167.49	9762.69	11530.3	8640.58	9246.9
Quinuclidinol	8860.79	8742.48	5464.67	7055.51	7634.38	6474.02
C54 H83 N3 P2	8838.38	3854.78	3260.7	4933.79	1816.19	2837.7
C38 H77 N3 O5 P2	8802.63	1567.59	1010.22	2361.81	4323.34	10439.1
Positive_791.23471_3.585	8781.09	12175.5	10389.2	19526.5	11134.1	12705.8
10-Undecynoic acid	8754.18	6651.92	6020.44	12371.1	8638.32	8029.44
C36 H86 N9 O6 P3	8729.12	15633.8	13859.6	3684.57	8301.04	8142.31
C3 H2 O9 P2 S	8714.12	7461.8	8756.01	9708.3	9249.1	7764.1
C6 H18 Cl N7 O S2	8708.86	8423.66	7894.51	14006.4	10301.7	823.717
C3 H3 Cl3 N8 O5 P2 S4	8699.61	11300.4	13138.6	9505.4	12421.8	8782.23
Negative_707.91169_0.777	8686.71	9967.88	5849.43	2226.59	4459.74	2990.94
C9 H10 Br Cl3 O	8660.67	4362.99	6959.73	6093.89	4580.78	7027.31
C15 H35 Cl N6 O2	8651.71	10949.8	3758.94	8018.68	5837.1	9994.21
C13 H23 Cl S	8635.75	9103.51	7622.32	18208	15857.8	18611.2
Negative_693.89699_0.78	8585.37	10141.2	5681.84	2032.79	2381.32	7400.5
C5 H4 N3 O5 P	8580.26	31257.9	49978.7	13442.3	35745.2	20961.7
C6 H3 Cl N6 O16 S	8564.97	10018.6	12846.1	12678.1	15026.4	15553
C3 H5 N8 O10 P	8564.32	9676.6	9458.2	11717	10531.6	6358.51
2-Acetamido-2-deoxyglucose	8554.34	8494.76	8025.36	7849.03	9622.87	7189.01
C14 H7 Cl O2 P2 S5	8553.74	8766.12	8657.95	7378.39	8772.9	9052.77
Sulbentine	8534.23	14263.4	8514.02	4675.77	4308.96	5224.35
C5 H13 Cl N4 O3 S2	8526.52	7033.43	6436.99	3230.79	5145.76	4994.21
C5 H13 N4 O4 P3 S	8524.21	11318.9	10895.2	8410.44	12111.6	8354.46
2-(2-Ethoxyethoxy)ethanol	8519.92	13657.5	13148.8	9011.19	13439	13135.5
C3 H11 N10 O P	8512.84	9015.59	8606.76	6026.95	9031.75	7608.04
C17 H8 Br Cl3 S2	8488.51	12194.8	8925.83	9477.41	10424.9	14336.4
C3 H2 Cl2 O4 S5	8484.68	13475.4	11186	15446.8	14089.4	6614.2
C2 H2 Br N2 O17 P3	8483.66	12988.8	15486.6	15149	15447.2	9250.53
Negative_144.92134_3.581	8466.73	7653.46	3471.57	927.954	2832.92	4248.73
C3 H3 N O S4	8454.27	10487.2	6905.01	8337.04	9369.43	9046.47
C3 H Cl O9	8452.19	7769.63	8248.91	6405.82	6291.94	7068.98
C5 H6 N6 S2	8432.2	6941.47	13981.7	14071.7	9586.46	15536.6
C5 H10 Cl4 N6 O15 S3	8424.63	12085.8	8547.74	6472.62	6818.32	6688.05
C53 H84 N3 O2 P S2	8410.82	7019.12	5019.35	4568.6	7195.79	8167.54
Negative_116.92635_0.846	8392.5	18577.6	27381.3	46378.1	12608.4	3801.69
C6 H8 Cl N2 O6 P3	8363.16	26590.3	12795.4	8245.64	16332.8	7176.18
C19 H43 N9 O4 P2	8338.18	9795.35	9191.6	10859.6	11629.5	12972
C5 H3 Br2 N3 O S5	8326.23	9742.6	14344	14032.3	16132.4	12094.9
C5 H Cl4 O11 P3 S3	8313.39	11549.5	12962.7	9511.05	10474	5858.3
primidone	8309.78	8385.19	7212.61	9101.24	7189.15	7723.46
C14 H16 N8 O	8305.79	8467.22	10416.1	7120.66	5779.25	7094.86
C44 H76 N O P3	8296.22	13670.1	10765.4	1464.11	10793.5	7060.57
C52 H72 P2	8288.43	8093.11	8700.8	5294.2	7481.21	7857.99
C40 H85 N6 O11 P	8261.79	9422.16	17945.1	13162.7	16452.3	12881.4
C3 H9 Cl N2 O2 S3	8254.39	11381.7	6995.25	11895.5	5209.39	7030.51
C3 H4 Cl4 N2 S4	8251.15	12162.1	14414.9	17995	20654.1	16475.4
C39 H80 O9 P2	8250.83	5103.79	7088.8	7316.9	4197.73	5227.59
1-(4-Nitrophenyl)-1H-imidazole	8239.8	8997.79	2581.47	2823.32	3201.63	8969.23
C8 H13 N7 O S	8237.57	5492.26	5390.83	5745.41	5388.9	6195.65
C17 H2 Cl4 S	8221.05	10310.6	9981.5	9863.28	10702.5	9948.91
C18 H41 P3	8212.07	6660.36	5538.55	4824.3	4818.25	13129.7
C H Br N10 O9 P2	8208.71	8225.75	7758.85	13227.8	8912.94	16491.4
C35 H73 N2 P S	8184.66	10928.6	3877.62	4649.63	3901.23	9128.73
C56 H74 Cl N	8165.17	2332.12	3750.87	5536.55	9734.36	6766.97
C3 H Br2 Cl4 O15 P S2	8158.08	14144	11317.6	12653.2	13113.8	4926.04
Dioleoylphosphatidylethanolamine	8143.06	35594.7	32998.9	3556.54	30307.7	11173.7
C22 H7 N5	8135.11	5142.31	2523.87	2340.16	1594.36	6821.73
C24 H40 N4 O2	8086.91	7602.97	8649.31	7964.36	6934.55	6645.18
C16 H36 N2 O6	8085.52	6170.15	5640.28	7396.95	8357.51	7206.46
C36 H74 N3 O9 P	8076.61	17210.2	11544.7	133318	82482.8	9429.54
C48 H82 Cl3 N4 O2 P	8066.75	10628.8	11248.7	10603.9	11498	22813.6
C4 H2 Br3 O7 P3 S4	8049.1	7873.82	9745.8	5862.52	6527.19	3328.02
C3 H Br2 O10 P3 S3	8043.12	17264.2	21214.2	12379.4	25673	16241.5
C47 H71 N3 O6	8039.77	5987.27	2950.55	7710.04	2585.65	2418.98
C7 H14 Cl N O11	8028.09	10306.1	12793	13952.5	15826.1	10557.7
Decyl phenyl sulfide	8022.41	9450.55	8763.75	7177.34	9040.26	7474.49
C2 H2 Cl O P S5	7990.02	15706.8	10954.2	4771.17	20411.2	6561.94
Negative_486.67268_0.739	7950.65	13135.8	15833.9	15428.5	17397.6	11238.5
C5 H2 N2 O5	7922.19	8365.36	7742.85	7984.1	7936.86	13142.8
C19 H18 N10	7922.08	6341.92	5601.56	8673.35	5151.78	8872.26
C15 H38 N3 O8 P3	7902.17	11859.2	4086.18	2338.56	3007.34	4157.9
C42 H71 N2 P	7901.85	9361.63	2589.02	5746.83	5558.25	13653.2
4a,9-Epoxycevane-3b,4,6a,7a,14,15a,16b,20-octol 6,7-Diacetate 3(S)-(2-Hydroxy-2-methylbutanoate) 15(R)-(2-Methylbutanoate)	7865.67	12150.9	15365.4	15405.9	16527.5	9934.44
Negative_162.89529_6.42	7859.38	6451.18	5228.53	2927.73	3332.09	10289.7
C16 H26 Cl N2 O17 P3 S	7828.55	11633.7	15548.2	10249.4	9295.63	4326.87
C3 H7 Cl2 N3 O7 P2	7817.36	8231.97	8491.56	13992.3	13411.1	13139.3
C38 H83 N8 O8 P3	7815.3	9169.58	10042.8	3864.81	9123.95	7606.68
C5 H10 N4 O4	7812.79	9300.9	7305.01	69123.8	74901.3	85578.4
Positive_671.55149_0.858	7797.52	11823.8	14868	7451.65	13578.2	7774.66
8-({[(2-Methyl-2-propanyl)oxy]carbonyl}amino)octanoic acid	7797.37	5843.78	5516	8791.73	7608.33	7168.75
C47 H72 N O3 P	7782.9	7797.39	5652.61	5353.98	8428.69	6608.76
C H4 Cl2 N2 O S4	7782.69	3085.19	6252.39	4716.6	5603.77	5638.19
3,6-Bis-O-(3-methylbutanoyl)-beta-D-fructofuranosyl 3-O-(2-methylbutanoyl)-4-O-(3-methylbutanoyl)-alpha-D-glucopyranoside	7780.72	9392.58	11457.1	17870	10025.8	15733.8
C H2 N O12 P3	7769.87	12693	2906.33	9557.91	17353.1	7325.26
C14 H30 N6 O5	7758.98	6876.96	6912.82	6586.42	6273.2	6520.33
C13 H25 N5 O	7755.41	7339.18	7298.17	9426.64	6302.27	8342.21
Laurocapram	7732.2	10799.9	9071.42	8548.29	10182.3	7810.01
C2 H2 Br Cl4 N10 O2 P3 S2	7723.11	9203.46	9025.75	9216.82	9635.31	6729.63
C H3 Br2 Cl N7 P S5	7703.5	11013.9	14960.9	12204.8	12538.1	10637.5
C6 H9 Cl2 N4 O P S4	7702.48	7645.57	6358.55	8259.34	7228.8	10667.4
C45 H91 Br N P S2	7690.74	3771.31	2263.44	1619.59	1564.34	5447.22
Carteolol	7685.85	9820.72	10805.6	11066.9	9983.11	13169.2
C2 H2 Cl2 N2 S	7683.79	11549.5	12844.7	11809.3	8574.89	5680.45
Positive_401.79506_0.907	7670.94	11943.8	8207.8	6555.27	13565.6	8931.99
C16 H30 N6 O2	7640.94	8284.57	8283.74	7639.11	8235.38	9250.9
C8 H7 Br N O P	7632.08	6375.71	6012.69	4516.16	5277.04	7185.47
C42 H85 Cl2 N7 S2	7631.68	9326.8	7018.27	10338.6	12180.2	11202
C12 H23 N2 O4 P S2	7626.98	7745.59	6747.27	8489.69	8228.46	9498.51
C17 H37 N2 O P	7622.92	12902.2	17289.4	16488	19924.5	15435
C5 H15 N3 O7 P2	7573.71	9243.86	9225.46	7859.19	7578.04	7298.35
C40 H80 N3 O12 P	7548.02	8952.72	8361.97	8516.52	5217.53	9207.45
C3 H6 Br Cl4 N2 O5 P S2	7546.45	10838.1	13141.9	12822.6	20745.5	13303.5
C3 H3 Br3 Cl4 N4 O5	7522.46	11183.1	14071.1	9885.75	12678	8118.27
Valaciclovir	7508.46	6092.39	6213.64	4759.16	4628.42	5378.89
b-Ala-Lys	7503.33	8945.87	8292.56	3677.28	3686.08	4847.17
C46 H81 Cl N6 O9	7498.36	4261.21	4616	5887.37	1820.51	8694.75
C41 H84 N3 O12 P	7497.9	13774	31454.7	6924.25	29136	9172.29
Negative_117.92649_3.533	7488.16	7355.67	11152.7	11541	10637.9	5063.96
C8 H5 Br Cl P	7485.28	8539.24	6385.88	4479.99	3464.56	7920.06
C2 H4 N2 O8	7474.54	6200.61	5429.05	5688.67	5896.51	8299.22
C3 H5 O5 P3 S2	7450.48	9388.95	10011.3	8609.7	6315.76	7892.6
Negative_159.87662_3.778	7431.13	7940.25	8142.58	5511.52	5614.3	6106.05
Positive_615.58983_0.852	7422.3	10171.7	12496.6	11180.3	3935.95	7813.66
C H Br Cl4 N8 S5	7418.89	9603.86	13874.2	12747.2	13098.4	10143
C25 H34 N4	7416.02	5024.54	4481.15	5910.87	3489.38	5066.54
C7 H Cl2 N3 O6 P2	7410.42	22586.2	22689.2	5682.21	36319.2	8940.34
C19 H48 N9 O7 P	7405.33	5708.77	4398.3	4855.57	4383	5267.43
C H3 Br Cl4 N6 S4	7387	12090.6	13841	14246.7	18319.9	10216.9
C4 H8 Br Cl2 O3 P3	7382.49	8466.41	7701.71	10638.4	11355.6	14670.2
C2 H4 N3 O2 P S	7375.18	605.984	4005.57	3684.02	3318.46	2371.78
C30 H46 N O7 P3	7361.22	2277.71	4225.89	6326.72	4394.94	5113.47
C34 H69 N6 O8 P	7352.36	7140.84	4851.13	7461.2	8924.58	10224.5
C50 H81 N3 O6	7347.69	297.888	250.754	4401.33	336.933	3181.39
Bis(pentachlorophenyl) disulfide	7343.93	11483.7	11319.6	10598.1	14244.1	8044.1
Cytosine	7337.58	3848	721.479	762.799	1466.51	7758.62
C4 H3 Cl2 O13 P3 S3	7321.7	9942.27	11583.7	9729.75	11238.3	6996.27
C8 H23 N4 O3 P	7314.36	6914.08	6949.1	7541.76	6716.04	7304.25
Botrydial	7313.7	4598.71	4688.89	6640.82	3891.54	6250.64
C11 H3 O2 P S4	7294.39	7068.83	6428.68	4580.96	5250.68	8282.33
Boc-Val-OH	7269.04	8080.17	6011.93	7680.06	6818.13	6258.36
2-isopropyl-N,2,3-trimethylbutanamide	7267.3	5106.92	6668.99	7583.08	5320.74	6725.63
C26 H49 N5 O4 S	7261.39	5975.09	4701.23	5698.59	4576.9	7636.04
C H Cl2 N3 O9 S	7250.79	7273.53	6684.42	5500.2	5496.85	8072.5
C39 H82 N3 O12 P	7243.62	11541.2	11782.1	12952.4	6977.18	7451.59
C18 H43 N9 O P2	7228.52	5443.26	7014.77	9383.31	6842.25	5394.78
C5 H19 N10 O2 P S3	7222.32	8059.09	8935.63	13447.8	7657.17	8468.85
Positive_791.73503_3.588	7207.52	7304.92	7274.37	12342.9	7339.12	8815.02
C2 H4 Br Cl2 O4 P3 S2	7188.5	11997.9	12600.1	15428	15007.2	13200.2
C5 H16 Cl N4 P S	7185.19	6877.25	6406.96	10601.2	10838.9	9035.13
(9E,12E,15E)-9,12,15-Octadecatrienoic acid	7180.74	8652.52	6486.41	10400.1	11937.6	12265.3
C3 H5 N8 O13 P S	7155.5	13202.4	17998.9	25290.4	24571.3	8065.8
fenamole	7154.51	5286.01	4328.7	5511.1	3729.65	7917.46
Positive_791.06789_3.583	7153.45	7368.02	7874.29	14087.1	7751.61	7796
C14 H22 O S	7134.83	5533.04	7851.72	8842.1	4757.34	3806.22
C3 H5 Cl N O5 P3	7133.16	12941.1	18690.1	11926	13510.9	8550.17
C3 H10 N4 O16	7133.01	7861.64	7993.68	12202	14259.2	10712.7
C20 H32 N P S2	7118.48	6024.25	7812.82	2637.59	2497.46	2571.03
Diethylene glycol	7117	4882.67	15037.1	29044.4	5984.11	6030.04
C2 H3 Cl N6 O2 S4	7109.01	5705.32	6420.78	7621.93	5818.12	6715.69
N-Benzyl maleimide	7108.87	7597	5860.87	109334	86759.4	80670.4
N,N'-(3,3'-Dimethoxy-4,4'-biphenyldiyl)diacetamide	7103.66	7420.59	7604.49	10079.4	7915.18	8437.58
C24 H53 P3 S	7103.19	8103.93	6129.08	15081.3	13226	22510.6
Vinyltributyltin	7102.41	7344.87	5600.99	5144.5	5233.23	7861.5
C5 H3 Br2 N2 O P3 S4	7091.28	11261.6	15022.2	13917	17105.7	12654.4
C29 H50 N2 O10	7056.58	7278.76	7591.63	6794.84	7151.53	8948.8
C4 H11 Cl N10 O11 P2 S	7049.35	14756.2	20772.8	29471.9	24762.7	8272.26
C36 H77 N6 O8 P	7045.63	3259.87	4953.7	5316.11	4984.97	3792.75
C5 H10 Br Cl2 N6 O18 P3 S2	7042.48	8597.65	5967.29	5166.05	6046.76	4728.4
C5 H11 Cl4 N2 O8 P	7025.34	8134.51	24950.8	36360.2	29257.8	10070.2
C12 H26 N6 O	7018.34	5888.12	5137.82	4511.16	7550.12	10561.5
Negative_789.58395_6.232	7016.58	6876.87	5756.23	5861.76	5529.46	1464.54
Di-tert-butyl malonate	7013.68	6955.6	6991.54	6125.6	7226.23	6812.54
C2 H Cl N7 P	7008.94	7333.82	6365.3	3672.62	6933.07	3715.4
C44 H81 Cl N O8 P	6972.58	6610.97	11917.1	1996.54	3243.12	1189.31
Vigabatrin	6957.12	7416.83	6950.25	66904	55360.1	75805.7
C3 H6 N8 S2	6953.84	6304.58	8991.92	8168.81	7545.65	7566.57
C11 H26 N6 O2	6951.84	6809.88	6971.34	5915.5	3836.36	10964.5
1-(4-Methoxyphenyl)cyclohexanecarbonitrile	6945.31	7942.43	4374.41	2465.51	7954.1	7000.91
C5 H Br N4 O6 S2	6938.97	7198.3	5988.78	4905.55	10123.6	18832.7
C13 H7 N O	6928.56	7876.79	6406.91	6722.8	7185.69	5861.51
C35 H75 Cl N9 O3 P	6921.73	2400.3	6011.05	12114.1	8482.73	660.165
C8 H Cl N2 O2 S2	6919.25	8106.61	6293.94	4084.19	3296.67	5166.19
Positive_744.54888_4.147	6908.54	9338.66	7614.38	3155.08	14222	5008.59
C3 H3 Cl3 N10 O17 S	6882.17	4447.35	4921.98	3167.39	3265.56	5919.25
Positive_593.17579_3.585	6880.52	9843.27	8192.59	15346.5	9275.66	11245.5
Negative_1564.85049_4.09	6864.62	11231.9	15172.9	14976	11546.6	532.806
2-[2-(Hexyloxy)ethoxy]ethanol	6856.27	5205.12	5850.9	6858.91	4683.54	6969.76
C4 H8 N2 O5	6852.12	11499.3	8436.46	6784.83	10819.8	6366.06
C4 H10 N6 O16 S4	6843.57	4471.65	1793.32	2262.99	1533.09	6981.54
C2 H4 Br2 Cl3 N6 O2 P3 S4	6805.78	22347.4	2925.43	19717.4	3455.64	3251.12
C41 H66 N9 O10 P	6802.51	10935.3	1266.64	2558.99	1951.91	1044.43
Leu-pro	6800.16	6539.2	6771.58	10246.5	10064	11778.4
C13 H33 N2 P3	6786.86	7137.06	5728.81	9773.05	6889.21	8729.85
(7Z,21R,33R,44Z,47Z)-24,27,30-Trihydroxy-21-[(11Z)-11-octadecenoyloxy]-24,30-dioxido-18,36-dioxo-19,23,25,29,31,35-hexaoxa-24lambda~5~,30lambda~5~-diphosphatetrapentaconta-7,44,47-trien-33-yl (4Z,7Z,1 0Z,13Z,16Z)-4,7,10,13,16-docosapentaenoate	6763.88	5899.21	8035.65	5664.56	6384.9	10147.1
C15 H32 S3	6763.58	5972.82	5499.54	5434.68	5897.47	7978.19
2-[(1Z)-1-Hexadecen-1-yloxy]-3-[(6Z,9Z,12Z)-6,9,12-octadecatrienoyloxy]propyl 2-(trimethylammonio)ethyl phosphate	6753.57	3059.1	1467.99	2437.79	5703.38	7570.65
C3 H Cl N8 O2 S2	6750.84	6763.44	4883.83	4105.4	4676.85	8975.72
Positive_207.1832_3.866	6750.78	6245.91	12656.4	22942.9	6593.48	5867.07
8-Methyl-8-azabicyclo[3.2.1]octan-3-ol	6745.28	3886.88	7322.25	14074.4	4701.16	4179.09
C H4 S5	6737.79	7663.69	8434.84	8736.75	12208.2	12923.8
Phenyl stearate	6734.39	7702.7	8065.65	6995.81	8282.28	9486.49
6-(1-Amino-3-methylbutyl)-N,N-dimethyl-1,3,5-triazine-2,4-diamine	6719	4611.61	4784.67	3572.21	3893.74	5085.07
C2 H Br Cl4 N6 O S3	6718.36	9562.22	13780.1	13473.5	7099.08	11941.9
(13E)-13-Docosenoic acid	6703.59	5934.95	6724.44	7247.44	4339.92	8162.85
C18 H3 N2 O6 P S	6683.69	8064.73	8012.92	7324.63	6268.21	5918.67
(2R)-1-[(Hydroxy{[(1s,3R)-2,3,4,5,6-pentahydroxycyclohexyl]oxy}phosphoryl)oxy]-3-(stearoyloxy)-2-propanyl (11Z,14Z)-11,14-icosadienoate	6678.4	8081.92	5985.55	6792.66	7042.52	7327.75
C9 H21 N4 O12 P S5	6671.38	8844.77	10216.8	13197.9	11501.1	8349.03
C9 H2 Cl N3 O S	6664.79	6534.82	7237.91	25565	20348.3	22640
C12 H4 N8 O14 S4	6658.37	8541.15	6160.35	7787.33	5852.35	7361.17
C H4 Cl2 N6 O8	6637.02	5648.86	6394.32	5585.03	5545.08	8424.84
C22 H37 Cl O2	6623.49	6638.98	11106.8	8145.62	6880.74	10796.8
C9 H15 O P S3	6614.78	7413.09	4353.08	2565.09	2960.43	4192.22
C3 H12 N4 O S4	6608.8	5979.7	6244.02	11825.1	12596.5	10345.9
C12 H26 O S4	6604.06	17485.1	9178.09	6182.54	4390.38	4732.16
C4 H13 Cl N3 O2 P S	6595.67	5943.96	5278.24	31314.9	26420.6	32562.3
C41 H86 Cl N8 P3	6591.74	6458.06	5010.62	6342.8	5454.25	3211.49
(4R,5S,6S,7R,9R,10R,11E,13E,16R)-6-{[(2S,3R,4R,5S,6R)-5-{[(2S,4R,5S,6S)-4,5-Dihydroxy-4,6-dimethyltetrahydro-2H-pyran-2-yl]oxy}-4-(dimethylamino)-3-hydroxy-6-methyltetrahydro-2H-pyran-2-yl]oxy}-10-{[( 2R,5S,6R)-5-(dimethylamino)-6-methyltetrahydro-2H-pyran-2-yl]oxy}-5-methoxy-9,16-dimethyl-2-oxo-7-(2-oxoethyl)oxacyclohexadeca-11,13-dien-4-yl propanoate	6589.83	8943.59	7563.83	6026.4	5695.93	9423.09
C4 H5 Br2 Cl3 N6 O2 P2 S4	6586.85	8745.9	9423.97	7347.59	11976.7	6444.19
C3 H3 Cl4 O2 P S3	6570.52	9991.86	10142.5	9270.96	11473.2	7263.55
C20 H5 P3	6568.89	8435.6	7703.6	5856.24	5855.62	5819.8
Negative_507.29473_4.684	6562.95	3452.81	1863.7	2974.67	1211.68	5709.7
C22 H34 N5 P S	6562.63	1603.5	1699.4	5206.32	1046.99	6041.03
Oxibendazole	6562.57	4924.49	5125.82	6891.11	4267.33	6276.06
C32 H48 N O P	6554.36	5123.96	3188.07	4375.44	2933.38	6627.2
Negative_731.95766_0.778	6545.87	8181.08	5588.44	8190.71	10176.5	5523.89
C35 H33 Cl P2 S	6531.47	18785	8296.32	4436.98	3391.53	4551.18
C36 H66 N2 S	6522.76	8959.2	2606.94	3010.74	2722.07	8517.08
C31 H55 Cl O S	6494.12	12248.3	3629	7947.71	5420.93	5978.27
(2Z)-N,N-Dipropyl-2-[1-(2-pyridinyl)ethylidene]hydrazinecarbothioamide	6490.47	7385.74	6031.4	5452.9	5308.51	6722.85
C14 H31 N O	6475.14	6602.55	5867.37	7254.46	5393.4	6204.9
C4 H12 N O2 P3 S	6474.83	3626.73	2854.61	5777.29	1773.78	3652.64
C15 H3 O4 P3 S4	6473.75	6126.66	5868.74	3803.84	4967.83	6229.18
5,5-Dimethyl-1,3,2-dioxaphosphinan-2-amine 2-oxide	6471.61	7075.36	7048.99	5983.07	6271.35	6681.25
C24 H26 N6 O S	6466.47	6197.06	5807.21	6236.83	6442.28	5541.39
C4 H11 Cl2 N4 O13 P S3	6466.12	11433.5	6974.45	6645.74	6820.11	14303.8
Gabapentin	6440.36	8020.87	10602.6	63860.4	41742.8	39053.2
3,5,7-Tribromo-2-hydroxy-2,4,6-cycloheptatrien-1-one	6432.67	8499.41	8916.97	8859.31	8743.1	4550.01
1-(4-Methylphenyl)-5-(2-dimethylaminoethenyl)-1H-tetrazole	6420.65	8374.53	7688.72	9198.1	16796.8	9441.29
Linalool	6409.7	4139.31	7694.59	6825.4	3969.75	11946.2
Undecylic acid	6406.19	7774.79	9385.1	8645.43	5230.34	6852.26
C22 H47 N7 O3 P2	6398.22	8907.76	7540.65	10022.8	11978.2	7311.67
C4 H2 Cl2 O11 S3	6396.56	8757.2	9342.24	11914.4	12727.7	10584.6
(2,2,6,6-Tetramethyl-4-piperidinyl)acetic acid	6392.78	8932.68	13881.7	153219	145529	48208.8
C33 H75 N9 O S	6390.63	10914.8	15937.5	15660.2	15644.9	10415.6
C34 H52 N O3 P	6388.62	4982.21	3040.86	4300.5	2848.8	6566.83
Juliprosopine	6382.06	10311.8	10405.1	9851.66	13682.1	7512
UNII:S67X93ZTKQ	6366.06	5787.94	6144.71	6511.42	5783.2	5010.32
ricinelaidic acid	6350.13	4519.62	4926.17	6097.82	6176.16	9702.46
16-hydroxypalmitic acid	6335.22	7456.7	6140.98	5164.69	4637.35	5686.14
Diethyl phosphate	6331.61	10823.8	9029.43	9978.43	12615.4	14335.1
Netilmicin	6331.23	8636.74	8094.39	9761.83	12466.3	6571.71
C45 H80 O17 S	6323.65	8302.59	3335.68	4864.45	5309.66	7407.17
Negative_828.56984_6.182	6322.17	6308.54	4468.11	5997.63	6536.21	3114.12
Spermine	6319.42	9602.11	8464.91	11049	15186.3	7265.76
Positive_759.81302_6.345	6318.4	7355.46	7255.3	4036.83	6002.47	5359.47
C12 H19 N O2 S3	6313.54	9707.28	12304.6	9787.18	12076.2	6282.27
C17 H31 N4 P S	6311.13	4436.74	5837.11	8271.11	8695.5	10772.9
5,7-Dimethyl-1,3-diazaadamantan-6-one Hydrazone	6305.58	9225.96	6887.28	5262.97	3087.21	3247.96
C21 H34 O3 S	6304.8	757.406	6660.46	8143.59	5709.73	6770.01
C2 H6 Cl3 N2 O10 P3 S5	6300.52	6966.66	7220.64	6953.35	7627.5	4841.74
4-Nitrophenol	6296.57	6217.55	7036.07	5240.79	6919.6	5543.58
C8 H13 Cl2 N4 O18 P3	6294.58	11360	13219.3	12421.8	14445.1	8239.42
C2 H2 N10	6280.02	15914	7257.35	3827.48	4616.5	3355.9
Bis[(diisobutylamino)carbothioyl] dithioiodidoarsenite	6277.34	9750.78	14048.3	14324.2	14702	2920.84
1H-Imidazol-4-ylacetonitrile	6260.03	22066.3	30321.1	35353.3	24265.6	20404.4
C3 H Br2 O15 P3 S5	6249.98	17299.6	17020.8	14199.3	15087.2	12585.6
C41 H73 N10 O4 P	6216.34	2580.16	4487.51	5770.95	6272.5	1913.32
N-Hexyl-N-(2-methoxyethyl)-1-hexanamine	6198.66	8215.86	7157.48	8838.48	6172.52	9544.89
C31 H55 N O4 P2	6188.41	6327.32	6098.71	5304.38	5617.42	9203.16
C17 H33 P	6172.18	4498.7	4766.67	7142.36	3718.34	6148.7
C15 H29 N5 O4	6152.87	6473.55	12768.3	11691.7	4683.64	5704.45
C5 H Cl N2 O2 S	6140.16	9917.59	6899.12	4019.75	7606.77	5105.38
4-(4-Chloro-1,2,5-thiadiazol-3-yl)morpholine	6136.14	5005.67	4013.38	14620.1	8591.73	16580.8
Positive_120.9673_6.436	6126.3	1895.26	3596.7	4392	1338.35	3737.6
C7 H24 Cl2 N10 O15 S5	6122.33	6979.16	4227.49	3951.08	5306.65	5652.2
C32 H21 Cl N2	6113.89	8846.92	9072.63	6545.92	8886.03	8372.81
C H2 Br2 N O6 P3 S4	6103.96	8347.78	9266.49	10445.3	13541.3	9644.44
2-aminomethyl-1-ethylpyrrolidine	6099.71	9370.21	7944.85	23560.1	21339.7	17510
C25 H49 N5 O9	6094.07	7182.02	8202.97	8862.02	9837.62	7101.45
C7 H2 N4 O2	6058.16	8003.18	8907.47	29045.2	34365.4	46410.7
C22 H47 N O2 S2	6032.54	5536.71	5346.64	5179.66	5662.56	5755.84
C12 H22 N6	6009.83	6332.61	7000.92	8124.15	10290.6	14377.4
C H3 N4 O17 P3	6000.74	7018.67	7914.53	8259.95	8400.46	5526.01
Negative_721.92799_0.775	6000.31	10413.8	9262.23	7803	8966.42	2945.66
C37 H77 N9 O10 P2	5986.66	7019.8	7144.31	6088.81	6045.35	7265.54
C H3 Cl2 O6 P3 S2	5985.72	9350.79	10820.7	13735.2	15167.1	12135.3
3-Amino-3-[4-amino-6-(dimethylamino)-1,3,5-triazin-2-yl]-1-propanol	5980.47	4632.56	5142.86	4809.3	4164.41	5470.9
C42 H76 N7 O6 P	5958.75	51007	14637.1	9393.65	53376.3	8750.6
C16 H11 N8 O8 P3	5957.52	5577.72	4867.45	5028.52	3935.5	6242.88
C65 H107 N2 O15 P	5953.98	2325.75	501.05	209.184	764.594	73285.5
C8 H9 N6 O10 P3 S	5939.32	8016.93	6775.82	5841.2	5615.3	6063.73
C13 H23 N4 P	5938.39	7354.41	6907.04	4790.08	6189.89	4196.32
Cyclopentadecanolide	5905.77	6742.46	5569.52	6627.77	5942.13	6912.45
Negative_853.58015_6.211	5901.67	7105.98	13492.2	2807.46	7615.96	6894.88
C16 H31 N5	5894.77	6232.12	6221.77	7019.79	6107.91	5761.08
C34 H76 N10 O2 P2 S	5883.02	1818.87	1805.09	10739.2	2238.61	1455.4
Tridecylic acid	5881.55	3454.45	6199.48	5447.93	5419.96	5967.77
C4 H11 Cl N4 O S4	5873.3	8658.15	7913.06	5785.41	7571.06	9723.26
C H Br3 Cl3 O15 P3 S	5869.85	11578.5	15420	11950.6	11445.1	10171.6
C8 H16 N6 O3	5852.42	6909.17	5624.75	7319.32	5156.06	7815.58
L-(-)-Asparagine	5851.72	3510.61	4651.97	31526.2	9414.69	30641.1
C20 H38 N O2 P	5825.46	5096.6	5025.08	5769.34	5245.5	5376.11
C3 H3 Cl4 O12 P3 S5	5815.43	6324.52	7742.53	7984.09	6117.62	4177.89
C8 H18 N8 O	5814.57	5167.29	4422.84	1884.95	2244.31	3095.17
C6 H4 Cl N2 O13 P3	5803.74	9719.5	8250.26	4550.37	11654.1	6504.58
C36 H80 N10 O10 P2	5798.55	3201.1	1182.71	1178.61	433.471	5171.42
C2 H N6 O11 P3	5781.33	9411.19	9424.31	9013.55	10713.8	10025.8
N-[(3R,4S,7S,10Z)-7-(1H-Indol-3-ylmethyl)-5,8-dioxo-3-phenyl-2-oxa-6,9-diazabicyclo[10.2.2]hexadeca-1(14),10,12,15-tetraen-4-yl]-N~2~,N~2~-dimethyl-L-valinamide	5772.58	6677.88	8595.3	14689.1	8828.6	8163.32
Positive_517.6649_0.872	5758.26	9037.79	12884.8	13204.7	8785.99	6702.8
C18 H28 N4	5746.26	8954.04	8363.38	5987.62	8016.75	11382.9
C40 H69 N5	5741.3	9821.77	12451.6	12373.7	14351.7	9638.83
C26 H4 N2 O13 S4	5739.68	6990.41	5153.29	5581.88	5014.62	5798.55
C42 H74 O3 S	5738.44	5840.31	3775.41	6916.24	6021.32	7696.17
C20 H37 N7 O2	5728.39	13327.3	17479.2	5811.76	8198.39	1253.69
C14 H37 N7 O2	5721.87	6803.5	5883.02	4965.83	5657.06	5796.24
C29 H51 N3 O S2	5718.97	6836.2	8341.44	5584.03	11558.2	4645.79
2,2,4,4,6,6-Hexamethyl-1,3,5-trithiane	5715.7	3235.6	5685.85	9386.26	4933.26	5622.44
C60 H75 N	5715.37	10178.9	9856.13	5422.42	11983.2	21495.9
C2 H7 N2 O9 P3 S	5695	7270.52	6662.66	12604.1	22987.6	3725.19
Demethon-S-methyl	5681.29	6490.19	4267.35	5434.92	7016.26	9344.07
C41 H76 N7 O5 P	5676.13	13429.8	11946.4	3712.46	13315.3	9955.89
C6 H10 Cl4 N2 O6 S3	5673.33	8399.75	5514.55	14778.1	14598.2	6209.06
C2 H N2 O3 P3	5672.92	4997.54	4161.88	4939.87	5871.86	6710.9
Butyl levulinate	5671.77	4711.96	5697.89	2964.19	2736.89	3382.62
C20 H24 N4 O18 P2 S	5645.39	7802.85	10703.7	10452.2	12490.1	2859.08
2-(Methylthio)benzothiazole	5639.29	4702.79	4915.71	5977.85	3924.72	6100.86
Positive_147.92783_6.429	5616.85	3677.13	6455.46	11462.2	2917.4	6912.11
C18 H2 Cl N2 O P S5	5615.83	5247.52	3941.62	2846	3096.6	4630.42
C10 H27 N10 O3 P	5611	5660.05	5792.37	3548.12	5186.83	3830.54
C3 H3 Br Cl O9 P3 S5	5602.66	12342.3	11065.8	8272.58	16607.8	6177.65
C2 H5 Br Cl N6 O2 P S5	5592.14	9671.59	10212.1	10711.1	9836.1	9876.21
C21 H34 N3 O P	5558.95	6430.25	6223.47	6461.49	5878.4	5633.09
C15 H22 N2 O4 S2	5546.07	5717.12	7534.86	2669.55	2655.68	2192.46
Positive_790.9009_3.586	5537.44	4132.3	3292.1	10932.6	7544.69	7894.57
C43 H83 N6 O P3	5525.74	7608.47	9421.78	2861.86	7171.02	2680.35
Succinic acid	5522.79	3498.66	7752.54	16076.9	6109.15	4290.6
C3 H12 Cl2 N6 O15 P2 S4	5517.7	7369.92	7435.58	4435.17	5923.27	5192.83
C2 H7 Cl N6 P2 S2	5497.64	7405.01	6691.1	3905.83	6987.04	4331.67
C3 H3 Br Cl O2 P S2	5494.43	12015.3	11101.7	10048.4	13482.9	4634.07
C20 H42 N4 P2	5494.32	4810.64	4428.96	5020.55	4218.86	7093.14
Negative_653.94072_0.774	5471.13	12088.8	13809	14485.1	11528.1	4997.17
Negative_515.65132_0.736	5443.91	10731.6	15183.4	12562.5	18092.4	11115.7
C9 H5 Br O S3	5441.66	8553.23	11013.4	16688.1	16669.9	9915.37
7-Cyano-7-deazaguanine	5434.51	4475.03	13519.9	8501.85	10424.3	3278.98
Positive_678.48788_3.585	5413.2	5149.69	7444.81	10421.5	6768.27	6472.84
C5 H16 N5 O2 P	5409.49	6215.17	6880.47	5695.74	5710.67	5143.23
Negative_441.72557_0.738	5388.23	6197.1	9556.53	10431.3	8791.97	7876.42
C4 H15 N8 O5 P	5378.93	4853.63	5835.41	4152.75	3227.14	5684.85
C27 H45 N O5 P2	5377.96	7484.47	6271.15	11858.8	12041.3	17653.5
C5 H20 N8 O S	5377.27	6097.44	5822.82	9591.27	9190.28	9986.45
C5 H19 N7 O2 P2 S	5377.15	4256.2	5244.1	3320.74	3878.51	5106.83
C12 H21 O2 P	5366.75	3065.41	3387.05	4782.01	3085.25	5086.69
C13 H11 O P	5363.87	4165.51	2271.59	10139	10071.2	16980.4
Negative_840.5688_6.17	5352.85	4781.73	8482.92	6176.35	6941.49	6647.35
C4 H Br S	5339.91	3584.07	2729.07	2945.61	2174.14	6071.75
C3 H11 Br Cl2 N10 O15	5312.19	5289.05	6250.08	2597.37	8929.12	5273.64
C9 H22 N9 O15 P S	5303.31	4957.3	3828.33	3177.41	2396.09	3640.81
C6 H9 Cl N O5 P	5302.51	5767.1	4824.59	4979.4	4101.2	4517.64
C19 H40 Cl2 N2 O	5300.21	3493.07	6317.45	5670.01	4506.29	5285.33
Positive_633.85452_0.92	5297.36	2954.5	4067.28	5622.18	5929.74	3803.44
C7 H11 N8 O4 P3 S	5287.48	4799.7	3302.39	3989.86	4392.09	4136.03
C37 H74 N7 O5 P	5286.72	3558.38	5961.58	3609.1	634.239	7870.85
N'-[phenyl(3-pyridinyl)methylene]dodecanohydrazide	5267.12	4068.61	3908.27	5819.84	4038.29	5553.8
6-[(2-Naphthylsulfanyl)methyl]-2,4-pteridinediamine	5265.56	5278.94	6701.66	12257.9	10394.4	11482.2
C6 H14 N6 O	5264.64	1222.37	1759.58	2338.73	2829.45	2965.09
C12 H19 N2 P S2	5260.86	4497.54	4554.41	3935.51	5245.93	5927.37
C2 H7 N8 O3 P	5256.85	4007.06	4070.31	7960.57	10584.5	12795.3
C21 H40 Cl N2 O P	5240.16	7641.28	9116.3	7600.58	8651.32	9120.04
C17 H27 P S	5239.48	6668.17	6620.28	5351.28	3933.83	5141.64
C6 H6 N2 O6 S	5229.68	4533.77	3328.56	5315.82	271.105	5901.51
C5 H14 Cl N4 O18 P3 S	5226.68	5504.89	5470.57	5135.81	5015.34	3594.78
C3 H11 N3 O S2	5220.02	5460.66	4880.07	5304.99	4488.39	4867.07
L-Histidyl-L-leucine	5218.61	4964.81	4077.64	50248.9	3951.37	5098.18
C39 H75 N4 O2 P	5214.08	7642.49	8269.77	5885.73	5462.08	10064.9
3,5-di-tert-butylbenzoquinone	5209.84	4716.37	3380.84	3474.45	4524.3	5474.35
C8 H2 N2 S	5207.45	6356.97	9757.19	6105.56	4884	6091.71
Positive_774.4807_0.864	5206.48	9316.4	5189.83	1734.98	4339.78	4053.12
C14 H25 N2 P	5205.33	2915.97	4627.63	4661.71	4435.59	5456.73
C31 H73 N9 O10 P2	5203.49	5956.23	5467.57	4615.24	4806.98	5755.74
C5 H3 Br2 O3 P S3	5199.75	4963.02	7792.16	8122.51	7130.89	5318.33
C18 H36 N6 O2	5195.74	5211.34	5627.05	6219.49	6381.97	5223.67
1-Hexadecanoyl-sn-glycero-3-phosphocholine	5188.26	10470.6	13927.9	6433.63	14563.5	5309.74
Negative_683.86726_0.77	5183.85	8225.55	4687.7	7144.29	2537.28	5913.23
C15 H9 N6 O7 P3 S2	5169.94	5236.56	5506.87	4506.48	3890.64	4042.01
C9 H5 Br Cl N2 O5 P3	5159.84	6735.15	9075.63	9322.51	11817.1	11099
Negative_779.92464_6.206	5151.65	6760.1	10083.7	8476.2	11417.2	444.322
C34 H30 Cl2 S2	5128.36	18901.4	5023.17	2637.12	2176.07	2537.43
C5 H5 Cl N6 O2 S5	5105.66	6423.49	7165.57	2089.3	4857.93	4693.3
1-stearoyl-2-oleoyl-sn-glycero-3-phosphoethanolamine zwitterion	5103.93	4141.9	3937.41	3863.42	5450.31	665.145
C41 H86 Br N7 O4 S	5103.4	20114.2	725.076	1441.95	743.457	5508.14
Pyridine, 1-acetyl-4-tert-butyl-2,3,6-tris(tert-butylthio)-1,2,3,6-tetrahydro-	5102.42	10074.7	2302.28	7532.91	3796.62	6564.61
C H2 Cl2 N O5 P3 S4	5095.12	9496.91	10531.8	12442	12188.6	9095.83
2-Hydroxy(~2~H_5_)-1,3-propanediyl (9Z,12Z,9'Z,12'Z)bis(-9,12-octadecadienoate)	5094.42	5025.23	5308.15	4839.59	5024.23	3940.37
C21 H31 N4 O2 P3	5092.44	4798.65	4160.49	2717.5	3552.36	4644.4
C8 H4 Cl O9 P3	5091.3	9906.69	6772.46	5037.14	13008.3	6370.89
C7 H4 N4 O11 P2 S2	5090.77	7827.83	8494.55	6722.51	6738.49	7910.31
C9 H2 N2 O2 S	5085.32	6476.39	5547.88	4232.72	4889.02	5039.51
C8 H21 N4 O2 P	5080.36	3622.65	5656.77	4298.32	3198.22	3968.51
C3 H3 Cl O7 P2	5061.94	4458.63	2287.78	2280.47	1663.41	5903.55
Negative_556.64277_0.739	5055.92	9605.62	12015.4	9997.98	12232.2	8187.15
C4 H10 O9 P2	5051.94	4746.12	3219.92	4853.98	4717.9	6781.16
C35 H80 N8 P2 S2	5051.92	3920.17	2562.34	2051.65	5587.19	3282.42
C48 H77 N3 O S	5049.39	6913.97	6775.75	8216.83	3967.33	614.8
C3 H6 Br2 N9 O3 P3	5048.51	5259.07	4737.41	3565.31	4452.93	5786.71
Dimethyl bicyclo[2.2.1]hept-2-ylphosphonate	5046.91	4543.95	3696.25	48047.3	52699.5	46174
C3 H2 O4 P2 S3	5042.76	4963.91	2770.13	3665.55	3344.61	5196.01
C H2 Br N2 O5 P3 S3	5032.78	5602.54	6717.88	6778.94	5325.82	2215.08
C12 H9 Cl2 N2 O13 P3	5029.51	2798.34	4969.05	5645.03	5496.02	4441.26
C2 H Br Cl3 N4 O6 P3 S5	5024.61	17491.7	19064.3	14820.4	19657.7	11211.7
C35 H83 N9 O10 P2	5009.85	13223.7	8625.09	6994.48	6728.08	9972.05
sulcatone	5005.59	3138.67	2576.84	26376.9	21129.8	13472.5
C41 H56 N5 P	5004.71	3917.93	1667.43	2126.46	7350.74	12085.5
C17 H26 N7 O P	4999.78	4401.97	4022.11	4423.15	4209.71	4805.52
2,4,6-Tribromophenyl trifluoroacetate	4985.99	6682.11	14287.1	4085.14	1564.56	5307.25
Negative_867.59726_6.219	4981.82	7841.39	13882.2	3590.81	8030.03	3330.94
2-(2-Chloroethyl)-1H-benzo[de]isoquinoline-1,3(2H)-dione	4969.77	5838.73	5505.38	5356.26	4484.98	5154.7
C37 H83 N5 O7 P2	4968.58	1408.75	2105.95	4187.64	4590.04	6624.46
Ethyl dichlorophosphate	4962.71	5245.61	5597.33	9927.34	8704.91	5315.81
C3 H8 N4 O15	4959.19	5385.55	5745.86	8650.83	10356	7697.98
C89 H123 N5 O15 P2	4950.82	4906.35	8491.88	5195.69	11516.8	190.02
C47 H79 N2 O14 P	4948.06	5328.13	5173.57	4198.46	4011.78	3895.32
C5 H9 O2 P S4	4944.91	11459.1	18176.3	14514.2	20680.7	6427.38
C4 H9 Br Cl N8 O18 P	4944.19	10341.9	7087.52	4536.88	2680.43	8071.97
C11 H34 N9 O4 P	4929.18	5189.45	3125.07	7234.24	5250.13	4406.74
C4 H15 N8 O3 P	4926.68	6916.2	5801.1	5599.54	5868.58	7274.28
C4 H9 N O8	4920.5	5510.54	3863.45	29874.5	46121.7	35934.2
C4 H14 Br N6 O11 P3	4917.15	3681.89	3418.63	4687.14	5427.82	3569.48
C2 H5 Cl N6 O7 P2	4901.94	5379.42	3953.57	4897.92	42269.6	59804.2
C6 H10 Cl2 N P S3	4888.95	5681.13	3055.69	2930.52	5220.29	6950.47
C29 H51 N O6 S	4877.75	4582.1	4120.21	3213.36	3573.46	6076.66
Positive_120.96723_4.048	4868.5	2760.41	3059.04	1242.85	2585.16	2732.36
C20 H28 N6 S	4857.89	3392.34	4395.84	3552.96	4483.43	5100.64
Negative_780.56996_6.169	4856.02	3336.76	849.064	811.982	777.787	1398.44
C11 H15 N2 O P	4848.97	4303.4	4187.94	5320.98	5701.09	4529.75
C4 H9 Br O14	4848.08	3272.73	2626.97	2694.45	3063.02	4999.46
Negative_874.76002_5.374	4845.04	1081.85	605.153	558.476	701.901	501.37
C7 H19 N4 O2 P	4837.27	5312.69	4565.31	6921.61	5199.12	9455.44
C5 H10 Cl N10 O17 P S	4832.23	6862.58	6138.77	4380.52	6076.23	3846.77
C41 H86 N O10 P3	4794.59	8403.82	6498.49	389.542	6682.81	8417.92
Phenyl dichlorophosphate	4792.77	3951.06	3133.62	2075.48	2275.06	3248.14
3,4-O-1,1-Cyclohexanediyl-1-C-cyclohexyl-5-deoxy-2-O-(1-ethoxyethyl)-1-O-methylpentitol	4779.82	4783.81	3609.7	4611.56	2544.07	4529.94
Chlorodimethylarsine	4778.76	5318.45	3846.18	3682.35	5066.86	5301.56
C13 H38 N9 O5 P	4778.3	5667.32	7308.78	8190.18	2654.23	4904.81
C32 H37 N3	4766.93	5583.04	5813.1	4106.22	6267.46	7383.7
Camylofin	4764.6	5440.37	4667.77	10182.9	7347.99	5380.12
C4 H15 N9 O14 P2 S	4749.86	6909.56	4075.73	5387.78	10346.6	8183.93
C2 H5 Cl2 O7 P3 S	4746.27	7168.07	5989.25	6898.13	6333.62	5518.96
2-{2-[4-(1,1,3,3-TETRAMETHYLBUTYL)PHENOXY]ETHOXY}ETHANOL	4739.72	4021.2	3753.81	4354.03	3643.4	6220.97
C4 H3 Cl2 O2 P	4737.18	7543.42	4603.21	2092.84	5315.14	1944.07
C38 H85 N6 O6 P3	4712.48	8408.64	3488.09	1026.25	2175.65	871.854
C3 H7 N2 P3 S	4704.43	6531.24	7618.81	8829.55	8906.19	5820.48
Myricanone	4703.83	1102.25	3280.81	1450.96	1500.46	5155.62
C15 H35 N2 P S	4686.45	3914.86	3379.52	3204.98	3671.89	5134.11
C23 H46 N2 P2	4682.96	5495.37	5284.04	4471.06	5147.54	3689.62
C5 H10 N8 O4	4675.98	3974.43	3682.75	7054.93	9001.19	5825.76
4-tert-Butylbenzenethiol	4675.94	4106.44	3938.59	38742.2	41451.9	31458.5
N-Methyl-1-octadecanamine	4671.99	4979.54	3936.04	4333.17	3354.29	2719.91
C H Cl2 N2 O P3 S	4670.85	4183.55	4626.2	3441.87	3073.33	2038.27
C61 H68 S3	4669.59	5402.63	3110.15	5128.47	3671.83	6034.25
C4 H9 Br Cl4 N10 O2 P2	4668.91	7255.94	8582.1	7737.7	7909.06	6471.82
Positive_681.58039_0.849	4661.14	4870	3857.78	4248.22	6628.83	3592.97
C54 H77 N3 O S	4649.37	3866.21	4820.55	6447.2	416.672	6631.38
C47 H79 N3 O2 P2	4648.46	8946.5	7019.41	9250.77	7439.2	7241.48
C4 H5 Cl O2 S3	4644.94	1099.34	6216.65	8975.2	1572.35	7313.07
UNII:XN1XVI4B2C	4639.1	9095.78	9344.45	25677.6	29040.9	16490.2
C38 H77 N7 O8	4630.98	4694.36	5491.21	7197.76	7733.13	613.593
C15 H35 N2 O P S	4625.52	5325.52	4194.61	7381.99	4935.17	4916.32
C41 H81 N9 O8 P2	4618.92	4306.67	3218.99	4505.88	4075.72	7345.08
C36 H43 N S2	4613.87	4070.15	2509.37	2974.68	1685.02	4483.47
4-Benzylpiperidine	4609.96	2841.87	4293.67	4132.65	1372.54	3385.27
C44 H71 N9 O4	4606.18	1377.18	4201.48	1493.76	379.882	1326.76
C7 H20 N6 O2 S2	4601.57	6723.89	9406.45	5973.64	2349.65	10776.5
C8 H23 N4 O2 P	4596.25	3097.75	3254.47	5563.71	5908.91	4437.79
Negative_119.93827_5.294	4571.03	3437.65	23717.3	2984.14	30557.8	2679
C14 H32 N6 O	4567.8	5099.28	6397.48	3970.13	6519.35	5882.45
C18 H6 Br2 Cl O8 P S	4567.43	4312.45	5512.85	4530.85	4754.35	4488.61
C H3 Cl O2 P2 S2	4565.48	4940.03	4887.03	3354.03	3903.38	4104.99
C5 H7 Cl4 N4 O P S2	4563.62	9637.7	14681.3	27120.7	26756.5	4859.72
Positive_609.60198_0.853	4542.09	7476.99	7062.68	6720.92	9672.57	5471.44
C23 H38 N4	4541.78	459.69	668.503	5238.42	88.66	2765.19
C23 H56 N9 O2 P3	4537.84	2726	3630.31	1870.35	2345.75	2941.67
C5 H17 N7 S	4528.37	1176.13	4338.37	3236.44	3408.52	2617.96
C8 H9 N4 O17 P	4527.72	3988.18	2924.28	3545.45	3508.12	3529.46
C49 H71 Cl N4 S	4516.29	3888.04	3282.49	3088.18	4964.15	4944.05
{4-[2-(Dimethylamino)-2-oxo-1,1-diphenylethyl]phenyl}(phenyl)acetic acid	4511.22	5182.74	4429.01	3781.58	6641.72	4127.26
Negative_889.56752_4.56	4501.32	7594.73	2584.16	4454.47	6066.44	4011.72
C32 H27 Cl P2	4491.77	13326	7728.25	3025.31	2713.94	4493.52
C36 H78 N10 O14	4486.86	2079.35	4100.06	4797.33	5661.59	3734.25
C27 H39 Br N2 O5 P2	4484.22	3929.23	5459.39	4396.69	4517.8	12481.1
7-({[(2-Methyl-2-propanyl)oxy]carbonyl}amino)heptanoic acid	4482.62	5231.47	5487.25	5092.54	8173.02	8867.47
N-[3-(1H-Imidazol-1-yl)propyl]-N'-(4-isopropylphenyl)ethanediamide	4458.97	4640.69	3839.61	3791.74	4510.13	5730.69
C18 H3 Cl P2 S5	4446.36	4034.22	2713.37	2579.92	3184.16	4021.69
C12 H33 N7 O2	4443.23	3500.06	4229.79	3804.24	3394.03	4206.62
C45 H85 N2 O8 P3	4439.54	5512.4	444.234	1087.23	3374.55	365.565
C46 H25 Cl N2 O	4438.39	9595.97	2791.17	1780.17	1453.82	3792.27
C15 H2 Cl2 N2 O2 P2 S4	4437.44	6751.71	4531.38	5359.45	4821.82	4532.59
Negative_154.87435_3.972	4428.15	3434.63	3024.71	3600.47	3882.62	5242.14
C H Cl N5 O3 P S3	4427.35	5273.73	6595.87	3775.85	4613.44	3795.46
Positive_123.08972_1.096	4423.4	8045.31	4924.55	5037.67	6297.7	4791.09
C41 H87 N O11 P2	4419.82	14213.2	3685.1	5075.67	12588.4	8473.18
2,6-di-t-Butyl-4-methylpyridine	4415.78	3126.33	3344.4	4102.07	2797.16	4029.08
C2 H5 Cl O9 P2	4410.38	4236.26	2881.41	4168.85	2284.79	4819.44
C6 H5 Br Cl O P3 S3	4397.94	6406.34	7190.19	10830.4	10538.2	6855.13
C52 H72 N10 O	4393.68	4699.76	619.322	1962.77	785.342	5817.87
C11 H26 N9 P	4387.03	4164.53	3533.25	3776.6	4896.39	4431.4
Negative_154.87433_6.224	4376.64	5033.29	1776.74	2197.77	3731.23	4823.83
C14 H15 Cl N4 O S2	4367.11	3147.37	4138.01	3286.61	3528.92	4552.66
C25 H42 P2	4365.34	3612.19	3841.95	4522.73	4178.94	4405.5
Mexiletine	4359.38	5507.59	4615.51	3044.85	3554.86	3329.61
C2 H2 Cl O10 P S3	4350.75	5403.86	7987.53	7092.56	7128.6	4654.02
C8 H2 N5 P3 S3	4346.37	8344.97	8991.46	3338.47	9291.21	4752.28
C3 H3 N4 O3 P S4	4345.4	7500.38	7353.22	5590.93	5772.36	7745.98
C7 H2 P2	4338.03	3197.08	5250.67	2907.3	3687.15	3294.95
C2 H5 O2 P3 S	4338.03	3197.08	5946.99	5290.84	5615.24	4602.57
Ethyl 11-(2,4-diamino-5,7-dihydro-6H-pyrrolo[3,4-d]pyrimidin-6-yl)-10-hydroxyundecanoate	4336.18	3927.33	3880.71	2949.54	3188.85	3242.09
C42 H73 N2 P	4331.81	5488.05	3632.61	2423.64	2698.11	6108.9
Negative_629.89576_0.766	4330.52	7367.51	9994.31	11515.7	12821.5	1655.09
C50 H58 N2 O3 S	4321.62	5310.76	3939.84	3445.61	6102.01	4217.31
C8 H29 N10 O P	4310.82	2937.39	2771.69	2964.07	2246.44	3388.29
(7R)-4-Hydroxy-N,N,N-trimethyl-10-oxo-7-(palmitoyloxy)-3,5,9-trioxa-4-phosphapentacosan-1-aminium 4-oxide	4307.3	18794.3	25808.1	28313	16889.1	14145.6
C24 H33 N4 O9 P3	4301.67	3958.3	5429.83	4376.14	4856.56	5352.7
C H4 Cl2 N2 O8 P2 S	4278.76	3190.04	4415.55	3777.21	3875.18	3816.05
C47 H76 O P2	4269	14387.4	7136.81	1494.48	9824.74	6052.49
C14 H37 N7 O3	4263.48	3878.49	3719.1	3779.18	3372.76	3822.18
C32 H70 Cl N9 O2 S	4261.45	6884.86	8878.11	8638.69	10017.1	6027.81
Glutaric acid	4259.14	3734.4	5050.26	4949.54	4611.33	7078.38
C3 H7 Br2 Cl N4 O4 P2	4254.16	7608.43	5831.9	13053.1	9224.39	5349.43
C36 H80 N9 O P3 S	4253.81	10882.1	9045.94	2168.72	12568.6	2277.63
Negative_679.88093_0.775	4248.89	9129.88	3069.52	2119.33	1854.89	4945.72
Gly-Lys	4241.43	5187.18	5830.97	7911.69	6363.37	7836.07
C7 H14 N6 O2	4237.71	7152.19	5220.1	3617.04	4219.8	4258.16
C32 H57 N O4 P2	4237.28	1000.97	980.596	372.826	1540.41	861.899
Positive_689.54405_0.915	4220.87	4788.05	8809.42	7858.23	9746.61	4076.69
C6 H10 N6 O4	4213.36	1777.68	8535.33	14297.4	1026.41	1640.64
N~6~-(2-Amino-2-carboxyethyl)lysine	4211.69	5881.06	4985.68	7304.19	7213.5	8809.77
Positive_749.72106_0.858	4208.9	2748.67	5663.76	3506.68	2720.25	2253.17
C9 H24 N6 O2	4204.8	3974.04	3354.04	3494.18	3794.98	3593.52
Positive_437.67696_0.865	4200.88	7136.12	6711.14	5210.42	6024.41	4032.96
C80 H111 O3 P S2	4186.57	5324.68	410.501	352.714	258.854	217.34
C17 H30 N4 O S	4169.84	3770.17	3648.62	4692.4	3932.41	4615.93
C2 H Br2 Cl2 O16 P3 S4	4169.33	5031.64	6471.8	3662.48	6946.35	3959.29
C41 H71 N7 P2	4168.37	382.52	391.573	4347.85	1899.57	39642.1
C20 H40 N6 O3	4165.55	3752.79	3903.95	4906.38	4847.22	3120.97
C8 H N7 O2 P2 S3	4164.85	3257.95	3883.43	2960.83	3679.32	3529.27
1-alpha-linolenoyl-sn-glycero-3-phosphocholine	4163.39	4625.53	5387.71	3913.45	6218.52	4001.24
Negative_136.9004_0.706	4161.75	8709.99	11046	8783.7	10628.8	3822.17
Positive_677.77196_3.584	4148.65	5887.69	4714.65	8112.58	6259.32	8040.64
C31 H66 N8 O12	4148.27	5021.99	5183.52	4313.62	4857.95	5813.28
C45 H72 N8 O3 P2 S2	4144.97	5339.36	2062.74	1933.71	2392.63	5176.85
C4 H16 N6 S	4138.7	2617.84	2219.61	3412.36	7183.2	10300.3
C2 H4 Cl N O5 S	4134.93	1591.51	1087.65	2942.36	628.209	1516.81
C2 H4 O5 P2 S5	4115.64	10704.5	7194.73	3878.65	13689.6	5133.28
C6 H10 Cl3 N3 O2 P2 S2	4105.08	4528.22	4178.39	7588.33	7015.92	6834.23
1,3-Dithian-2-yl(phenyl)methanone	4102.13	3396.94	3786.29	3919.15	5279.81	4825.6
Negative_889.57203_4.928	4094.17	4021.21	10946	8084.59	5830.57	5228.67
C30 H38 N2 O4	4078.29	4369.06	2352.11	1637.94	1766.55	2154.57
C41 H83 N4 O17 P S	4060.99	2892.51	6785.1	14426.4	11842.8	1352.37
C21 H41 N5 O	4051.49	4149.24	4354.12	3347.87	3539.53	3657.69
C H3 Cl2 O7 P3	4047.6	3144.59	4606.23	3398.61	3705.48	3474.68
(4-tert-butylphenyl)acetic acid	4041.88	3647.94	3095.79	2969.05	3515.61	4306.85
Positive_593.42684_3.584	4035.69	5117.92	5716.95	7461.99	6731.46	5897.97
C18 H44 N9 P3	4034.35	3849.04	2766.82	7409.15	4790.26	7411.04
C16 H37 N8 O2 P	4032.2	3362.74	3651.43	4221.61	3499.8	4083.66
C15 H32 N2 O3	4027.85	4757.59	6573.42	12789	11664.7	6522.9
C4 H6 Br N2 P S5	4026.6	7216.54	11351	16265.9	18370.9	8185.39
C36 H75 N10 O12 P	4018.41	4953.36	8010.31	213.319	5019.72	5967.53
C13 H32 N4 S2	4016.76	5449.19	4540.67	4077.3	2575.37	4147.13
C22 H9 N2 O18 P S4	4016.28	4882.56	3906.48	3814.66	3763.4	4199.85
C15 H28 N O4 P	4008.81	4348.08	4385.84	6560.17	5048.67	5825.18
C44 H79 Br N3 O3 P	4007.41	1147.53	918.185	8066.94	9527.34	8326.53
3-(3,5-di-tert-butyl-4-hydroxyphenyl)propanoic acid	3993.7	3660.23	2981.01	2822.72	3000.94	3687.99
C12 H28 N6 O2	3993.59	3552.16	3681.7	2515.27	2854.08	6031.17
C3 H3 Cl2 N2 O5 P3 S5	3985.72	5143.24	7404.87	9370.59	9767.51	5427.43
C5 H4 Br2 Cl4 N O9 P3 S5	3983.83	9966.23	5661.44	5688.97	4752.69	1340.87
(Triethoxymethoxy)ethane	3983.64	4608.91	4730.97	3579.28	4720.87	4623.62
C23 H54 N9 O2 P3	3977.74	5319.89	6436.71	5818.51	6653.97	4685.36
N-[(2S,3R)-1-(beta-D-erythro-Hexopyranosyloxy)-3-hydroxy-2-octadecanyl]docosanamide	3966.67	2877.82	648.552	1123.63	1234.92	1777.06
C9 H22 N9 P	3961.72	7303.81	3239.65	2621.31	3186.46	2430.64
C35 H78 N6 O5 P2	3958.27	55441.4	48889.2	1396.7	42474.8	15126.4
C6 H7 Cl O14 P2	3948.13	9165.03	14365.6	21614.9	18672	7011.67
Positive_232.86414_0.966	3946.07	6302.86	4906.76	4466.11	6048.67	5131.8
C2 H Cl3 O8 P2 S4	3933.81	3603.51	3630.52	4510.13	5301.67	3475
C26 H52 N O3 P S3	3928.07	3017.2	3113.49	3216.87	2485.44	4178.76
C4 H5 Br N8 O6 P2 S	3923.15	3340.94	3990.62	5183.56	4536.79	7619.56
C36 H72 N8 O12	3916.78	13446	10271.7	13726	4151.71	5908.26
N-Hexadecylformamide	3912.26	3147.38	2673.94	3635.55	2691.48	3819.27
C42 H64 N7 O17 P3	3902.45	5658.48	4814.14	4499.73	5763.23	4917.84
Metirosine	3892.79	3941.2	2456.9	2045.76	1994.65	4623.98
C22 H53 N7 O12	3883.73	4926.04	5044.55	5798.06	7094.45	4191.65
C3 H Cl2 N O16	3866.72	4048.15	9191.14	4374.27	351.568	4521.02
Positive_731.50701_0.85	3851.82	6895.33	5569.59	4905.15	6786.8	3944.72
C34 H77 N7 O13	3843.68	2201.99	2698.11	6146.48	18738	10268.9
C27 H9 N6 O17 P3	3831.43	5933.62	9202.15	8146.32	11900.5	294.626
C4 H6 N5 O6 P3	3806.51	2131.16	2682.09	4996.08	2999.3	1990.06
C40 H84 N3 O11 P	3801.47	1804.65	2766.94	1187.1	4182.83	1348.98
C2 H2 Cl4 O7 P2	3795.79	2836.85	1192.26	1197.02	1247.1	3690.01
Positive_637.89592_0.935	3781.85	3280.04	3255.42	2454.25	2051.6	2077.51
C14 H32 N7 O17 P3	3774.44	2914.47	3755.14	2325.95	2719.71	3106.45
C11 H21 N5 O2	3772.94	4361.81	7230.37	5086.49	4514.79	3970.29
C41 H89 N4 O10 P3	3772.8	2422.68	2748.57	2058.52	2448.38	4119.43
Positive_837.3934_0.859	3761.02	4771.65	6042.27	3135.76	4545.94	3130.12
C23 H47 Cl N2 O	3743.02	4019.39	4884.07	4539.19	3659.63	3600.69
C30 H58 N8 S	3728.56	4232.59	4712.51	5235.21	7365.3	6032.98
Positive_769.52502_0.914	3728.2	2299.22	5158.63	2012.8	3311.98	2286.97
C2 H2 Cl N6 O8 P3 S3	3709.35	6481.35	7220.51	6884.53	8860.12	4505.94
6-amino-2-(propylsulfanyl)pyrimidin-4-ol	3707.49	2359.21	3228.59	40786.3	44159	36816.9
C39 H78 N2 O4 S3	3694.53	4682.3	3300.82	2531	2204.26	3348.9
C19 H7 Br2 N2 P3 S	3690.14	4345.01	4742.97	2426.71	2754.45	3933.02
Vorinostat	3689.44	5996.15	6945.95	7445.22	4305.35	4641.16
C25 H4 Br3 N2 O2 P S	3680.98	3556.25	3568.43	3197.48	3366.34	1620.71
C10 H29 Cl N10 O7	3679.67	2176.51	2947.85	2785.54	2579.43	2517.27
C14 H40 N10 O	3678.09	4656.78	3286.07	4321.31	5122.97	5929.04
C42 H82 N4 O11 S	3640.96	5318.19	1485.25	796.059	2897.37	1442.61
C2 H2 Cl N7 O2	3638.46	2206.66	2984.91	11298.4	12545.5	15556.5
C22 H43 N9 O2 P2	3637.14	4239.96	4646.01	7374.91	4394.62	6747.39
C17 H5 Br2 N2 O4 P3 S	3633.65	2861.5	3415.76	2356.43	3419.2	3422.73
C30 H69 N10 O P	3619.39	3680.78	834.065	3066.42	2090.66	6021.08
C H2 Cl O6 P3 S5	3616.48	4564.13	5407.08	5198.33	5830.4	4760.47
hexobarbital	3614.5	2677.27	4540.65	24484.2	21129	22363.5
N,P-Di-tert-butyl-P-isopropylphosphinothioic amide	3612.18	4049.06	4064.93	300789	272399	108595
5-(3-Azabicyclo[3.2.2]non-3-yl)-6-ethyl-2,4-pyrimidinediamine	3609.32	2206.95	2559.21	3277.61	1958.12	3699.39
C41 H80 N6 O9 P2	3607.47	3395.84	3255.59	3352.83	2065.35	2595.52
C34 H43 Cl N6 S5	3606.55	3615.26	25441.4	1951.1	10215.5	4113.57
C3 H6 Br Cl4 N4 P3 S5	3600.65	2870.74	5123.08	9701.25	6835.48	3519.51
4-(Dibutylamino)-1-butanol	3596.59	2543.62	2811.05	1773.8	2934.94	2767.28
C22 H37 N S	3590.32	3039.28	3070.77	3050.42	3236.46	3378.69
C13 H27 N O2 S	3579.31	2047.16	3036.21	1495.32	2579.97	832.296
C23 H40 N5 O5 P	3573.21	3672.05	3325.11	4259.71	4905.97	5691.75
C9 H N4 P S3	3564.13	6399.1	4959	1573.67	5039.79	1446.1
cholic acid	3557.64	2307.05	4119.07	5284.19	2357.6	5200.06
C6 H18 N6 S2	3536.48	3491.18	3049.43	3694.35	2690	6042.23
Negative_897.57844_4.976	3533.49	2105.2	434.549	1611.48	1703.15	2894.95
Dibutyl phenyl phosphate	3531.36	3389.25	2533.78	2662.33	2749.1	3641.82
C12 H32 Cl N10 O2 P	3520.91	3853.74	2966.14	2975.29	3188.01	3816.49
C21 H30 N O3 P	3515.66	3049.61	2953.77	3178.74	3213.94	3850.68
1,2,5,6-Tetrabromohexane	3512.3	39640.6	18703.3	2818.23	9011.61	5870.25
C39 H82 N5 O4 P3	3501.27	3751.57	17944.9	2741.26	5161.69	1397.42
C25 H47 N6 O3 P3	3499.58	3710.49	3735.79	4713.71	6158.23	6563.48
C11 H37 N10 O7 P3	3492.58	3347.38	2824.72	3136.3	2722.42	2035.18
C27 H48 N P3	3484.24	3266.49	2016.07	4576.02	2698.56	4300.01
C35 H74 N8 O8	3482.15	2720.6	3835.54	8621.09	3039.07	2411.32
C27 H52 N3 O2 P3	3462.7	2738.43	4013.36	3092.58	2238	3120.71
C21 H31 N4 O P3	3453.51	2932.3	2268.99	2001.73	1871.7	3226.6
C54 H64	3451.28	1882.5	2059.34	2798.41	2275.78	2915.15
C21 H41 N5	3441.12	4698.66	4421.66	3994.75	6676.09	3471.99
C16 H35 N7 O2 S	3428.4	3182.75	2736.49	2264.92	2787.41	3866.88
C6 H11 N O7	3425.12	2706.02	2608.55	3421.02	4820.45	7044.76
C3 H10 O7 P2	3424.41	3001.89	2749.43	3371.48	3367.18	4771.57
C24 H26 N6 S	3420.25	2717.63	2166.07	1653.67	2007.64	36595.9
C3 H8 Br Cl2 N8 O16 P	3419.42	6430.36	6339.44	7788.63	7345.1	4708.14
C30 H69 N7 O15	3414.86	445.998	371.502	4654.96	412.089	390.566
C6 H11 N7 O2	3409.76	4063.8	6216.57	61818	66763.3	27332.8
C6 H20 N6 S	3407.39	2320.31	1637.71	1830.42	2033.6	2471.38
C H Br Cl N2 O16 P3 S4	3397.45	5834.92	7966.46	6780.48	4446.89	1677
C12 H25 O4 P S	3394.01	3543.45	3826.76	12202	7661.91	13478.7
C8 H Cl2 O8 P3 S	3388.45	4914.73	5742.06	9596.37	8635.95	5763.34
C42 H37 N O	3386.21	3684.62	4233.24	5937.47	6495.23	7795.81
C5 H3 O3 P3 S	3385.2	5980.24	3663.2	2845.32	2812.6	5615.46
C23 H34 N O P	3384.86	2501.54	924.785	1046.25	2760.56	1117.11
1-(1Z-octadecenyl)-2-linoleoyl-sn-glycero-3-phosphoethanolamine	3376.61	7873.31	1112.29	1235.52	9796.58	5717.71
(21R)-27-Amino-24-hydroxy-24-oxido-18-oxo-19,23,25-trioxa-24lambda~5~-phosphaheptacosan-21-yl (5Z,8Z,11Z)-5,8,11-icosatrienoate	3369.39	7035.26	116462	171066	120257	163711
C14 H4 Cl O4 P S2	3367.47	2859.56	1632.51	2233.91	1687.11	2917.15
Positive_555.73367_0.937	3358.46	7507.46	8308.8	3784.11	8502.22	3323.5
C14 H24 O10	3357.16	2054.07	2861.35	2694.3	2676.6	3046.6
C16 H37 N7 O2 S	3354.86	4034.89	3735.67	2962.06	3124.68	4541.11
4,4'-Bis[(4-chlorophenyl)sulfonyl]biphenyl	3354.75	5175.21	7641.07	5669.91	7589.6	4782.34
C7 H7 Cl S4	3354.06	5626.62	4355.78	5515.7	5272.2	5512.42
C38 H84 N5 O5 P3	3351.47	2316.11	6332.15	3424.94	383.327	3909.69
C2 H5 N3 O5 P2 S	3346.21	2919.46	2636.93	2114.05	2739.5	3849.11
Positive_735.56708_4.153	3346.16	3536.46	8175.99	3701.69	3269.18	3107.26
Positive_577.71555_0.94	3343	5811.1	6545.43	5094.07	9140.25	4087.87
C17 H21 N8 O5 P	3342.8	3093.39	2974.55	2679.69	3132.42	3585.32
C33 H71 N10 P	3340.39	3908.08	3999.1	4086.55	5027.88	4132.52
C19 H2 Br Cl N6 O P2 S5	3336.5	3314.69	3868.56	3578.84	3785.73	4206.26
C7 H Cl N2 P2	3334.11	2556.77	3879.18	4400.82	4054.38	3642.19
2-{2-[2-(Hexyloxy)ethoxy]ethoxy}ethanol	3322.13	2436.94	2845.87	2781.28	3278.89	2681.95
C46 H68 N6 O	3306.73	33118.5	45019.4	3006.21	34483.7	12385.4
C10 H16 Br3 N6 O8 P S	3304.91	1400.75	1886.45	874.836	1640.66	2508.86
C6 H N6 O6 P	3303.37	4258.96	4372.03	5496.77	5938.24	6171.6
2-Chloroethyl (9Z,12Z)-9,12-octadecadienoate	3281.92	4020.99	3572.98	3129.66	3009.52	4364.4
1,3-Dioxolane-4,5-dimethanamine, N,N,N',N',2,2-hexamethyl-	3278.9	4002.78	4500.14	22027.3	12680.7	11219.8
Positive_633.62908_0.915	3278.26	4175.49	6662.87	6060.88	4767.2	2882.43
C25 H58 N7 O6 P	3273.14	1980.52	3463.68	3152.16	1534.67	3017.34
C30 H69 N10 P	3260.14	4010.02	3469.79	4511.3	4680.98	5751.1
UNII:B9Y126NY8K	3250.18	2719.13	2913.48	3028.09	2400.75	3175.6
(+)-Lacosamide	3247.65	5136.87	5614.01	5448.4	2995.3	3464.21
1-Hexadecanoylpyrrolidine	3246.31	3945.28	5019.36	9833.87	15291.8	2704.95
C22 H30 O S	3245.23	3127.72	2413.46	2573.88	2934.65	3826.11
C23 H48 N3 O3 P3	3244.03	2301.44	2419.95	3386.41	1564.73	3174.88
C29 H43 N5 O2 P2	3235.59	2716.72	1880.28	1980.15	1077.92	3685.86
C27 H62 N10 P2	3231.32	1842.44	2808.93	2587.08	2444.9	2164.9
C3 H3 Br N6 O17 S	3226.29	2245.04	1078.67	657.333	709.373	4399.28
C29 H16	3218.11	2070.46	2197.1	3429.16	1540.33	2760.76
C H3 Br2 Cl3 N6 O3 S5	3216.86	13660.1	15119.7	13042.6	12458.1	5033.75
Positive_559.77513_0.968	3216.41	6729.97	7492.33	6951.74	7386.52	3331.26
C8 H23 N3 O P2 S2	3215.75	3721.32	3217.03	3128.31	2702.42	4162.86
Butylparaben	3214.13	2847.49	2774.11	3142.1	2703.33	4797.12
C36 H78 N9 O8 P	3212.33	4861.2	5289.44	2122.86	4206.86	2637.24
C40 H84 N5 O14 P	3210.99	50739.5	91794.8	59426.1	63129.7	3073.24
C37 H76 N2 O5 S	3200.67	4370.89	1298.58	1655.92	1260.34	5722.33
C32 H69 N10 O2 P3	3192.95	3268.29	3271.73	2893.53	2458.96	2887.95
C10 H28 N8 O2	3191.95	1717.94	2321.26	3413.86	2322.14	3150.62
C35 H76 N9 O9 P	3180.58	4119.53	2844.6	3738.75	4358.82	5258.61
Negative_615.52254_4.807	3171.75	3485.59	1940.4	2614.98	1222.76	5698.48
12-Aminododecanoic acid	3165.96	4856.37	7095.23	430203	410740	112425
C4 H8 Cl N8 O2 P S3	3158.27	4852.2	3614.12	3601.99	4161.16	5171.76
C8 H18 N8 S	3153.83	1603.92	1413.75	1735.1	2076.23	1887.2
N-Docosanoylglycine	3149.74	2923.34	10641.4	31520.3	7537.03	9951.02
C7 H19 N O9 P2	3144	1781.95	1655.55	985.9	1308.29	2643.95
2-Methoxy-4,6-dinitrophenol	3139.53	2689.07	3892.44	3042.11	4007.27	3874.72
N-{3-[(Diethylamino)methyl]-4-methoxyphenyl}-2-methyl-6-phenyl-4-pyrimidinamine	3129.31	4894.1	3997.03	5398.98	6142.72	2290.33
C14 H33 N7	3111.91	6120.06	4350.13	3086.98	3858.3	4275.68
C29 H42 N8 O2 P2	3106.95	3678.76	3783.58	5190.5	6761.61	6931.25
C5 H2 O7 P2	3105.33	2467.32	2375.74	2269.82	2325.93	3560.28
Negative_788.5562_5.125	3104.54	9680.6	16403.3	4472.5	5287.29	27054.9
Ethyl [(2-ethylhexyl)amino](oxo)acetate	3098.06	5970.37	6805.87	13647	10779.6	4545.02
C4 H Br Cl2 N3 O17 P3 S5	3096.26	2296.07	3384.48	1184.24	3966.69	707.076
Ethyl 2-(benzoylamino)-N-[2-(3,4-dimethoxyphenyl)ethyl]-3,3,3-trifluoroalaninate	3094.27	3005.21	3873.4	3528.92	3923.12	2656.2
Positive_839.43812_0.866	3090.78	4593.89	5229.11	9118.49	6786.33	2419.31
C H4 Br2 Cl4 N6 O3 S5	3089.58	8303.62	7269.62	5309.84	7483.07	4226.26
C4 H Cl N2 O11 S4	3082.59	4059.14	4819.76	4820.59	5576.73	2802.35
C3 H7 Br Cl4 N10 O2 P2	3080.66	3115.49	5159.21	2977.33	3233.69	5291.53
Negative_846.55177_4.656	3079.73	174.387	1657.04	1448.61	2343.57	1619.99
C3 H8 N8 O S2	3067.83	2536.85	2334.15	2592.41	2239.21	2300.6
C35 H44 Cl O3 P S4	3066.75	1852.04	1973.88	2344.24	12636.6	32180.5
Methyl stearate	3066.36	1288.09	1481.21	1562.36	1146.32	1844.68
1-(1Z-hexadecenyl)-2-(9Z,12Z-octadecadienoyl)-sn-glycero-3-phosphocholine	3064.63	2777.43	3940.87	2362.93	1500.75	910.198
C16 H35 N8 O P	3058.82	2539.57	2596.3	2965.28	2124.15	3323.31
O-(Hydroxy{(2R)-2-hydroxy-3-[(9Z)-9-octadecenoyloxy]propoxy}phosphoryl)-L-serine	3058.58	403.867	645.428	1611.99	410.406	2009.59
N-(6-Oxo-6,7-dihydro-3H-purin-2-yl)hexadecanamide	3051.92	2278.09	1949.67	2731.52	1680.29	1641.39
C37 H76 N3 O10 P	3051.07	9812.9	24773.1	1172.94	20380.7	5170.52
C6 H9 Br Cl2 N3 O5 P3	3047.43	3283.47	1991.56	4826.6	5246.63	5100.45
C9 H24 N6 O2 S	3046.29	1479.55	2733.22	4834.01	2801.09	3003.08
C6 H N6 O5 P	3040.86	2644.92	1732.11	3093.68	4372.26	4644.74
Negative_928.5423_4.161	3039.13	3843.15	3946.72	3495.54	3668.55	3782.02
Ethyl (4Z,7Z,10Z,13Z,16Z,19Z)-4,7,10,13,16,19-docosahexaenoate	3038.35	3757.81	2677.86	3429.92	3431.57	3700.71
C18 H33 Cl O2	3035.24	4893.7	2561.06	3631.25	4992.72	4196.02
C60 H64 N4 O	3031.45	2963.37	2746.82	4353.53	3724.19	3789.58
2-Oxatricyclo[20.2.2.1(3,7)]heptacosa-3,5,7(27),22,24,25-hexaene-5,24,25-triol	3026.33	1451.32	1421.92	2247.81	1223.71	2541.36
Positive_410.85765_1.015	3024.38	6911.34	4194.75	2929.24	8666.44	2602.52
C H3 Br2 N4 O11 P3 S	3012.05	3733.26	5968.54	4885.99	7909.44	3698.33
(19R)-25-Amino-22-hydroxy-22-oxido-17,21,23-trioxa-22lambda~5~-phosphapentacosan-19-yl (9Z)-9-octadecenoate	3007.65	6520.66	9387.67	6771.88	9438.31	6427.86
1,1-Bis(cyclohexyloxy)-N,N-dimethylmethanamine	3007.1	4517.88	6855.56	106472	84990.8	30234.3
PEG-4	3003.15	14771.2	3532.15	3292.75	3289.1	3977.06
C H Cl2 N2 O7 P3 S	2994.46	3175.92	3250.6	2801.8	3294.82	2640.83
C49 H62 N10 O	2986.85	2564.92	2844.49	2845.04	1753.63	2409.15
[truncated: 1,682 more rows]

## Sheet: Targeted (5MM)
	01-Pre	01-Pre	01-Pre	02-Post	02-Post	02-Post
compound	*1 (2,3)	2	3	4	5	6
L-alanine	1834554	2084992	1620518	7576318	7368714	7816332
L-arginine	576153	597775	543196	2622347	2425902	2816610
L-asparagine	115616	88613.3	60792.4	545219	405270	656340
L-aspartate	991222	891220	683316	2463558	1961152	2843091
L-glutamate	5342886	5088096	4207151	9432440	6912116	9422123
L-glutamine	2389460	2210677	1723901	3575820	2602240	4570060
glycine	727732	596316	632422	1114104	1056950	1282208
L-histidine	192774	140972	118771	2668938	2497538	2753961
L-leucine	9217775	8652081	7932100	61375860	62672920	55509240
L-lysine	796578	713313	653608	6389420	5032888	6801810
L-methionine	1085404	925600	808238	3606777	2792913	2776382
L-phenylalanine	1668853	1686124	1401882	14655150	15016610	12085400
L-proline	5974354	6083402	4448816	25940600	22794700	25132270
L-serine	167456	132350	105441	816914	598142	901523
L-threonine	536422	467366	469182	2324105	1788385	2458320
L-tryptophan	535041	611361	571541	7827090	6929944	6271168
L-tyrosine	728089	797706	742615	4299434	4664270	3594924
L-valine	4223680	4312833	3538863	30185410	31889430	26577230
L-cystine	19143	7738.91	6604.55	12346	30497.7	20404.7
ATP	130377	221625	246841	152922	296488	234503
ADP	162152	122874	91017.7	54704.6	51239.5	92194.5
AMP	712643	670762	604250	614407	391333	546607
Adenosine	2076401	2111351	1745058	2125946	1431603	2373689
Adenine	132908	0	160758	151580	129220	136001
GTP	16196.3	29454.7	32448	5792.88	17453.1	11000
GDP	97091.4	97017.6	106074	65180.6	68758.7	95565
GMP	110247	80495.2	79033	60035.8	56717.4	44843.8
Guanosine	0	2653.41	0	51592.7	44686.4	71854.1
Guanine	5117.87	5394.69	4647.84	2721.62	2445.97	3791.11
CTP	9375.51	21706.4	13240.5	10893.8	20254.6	11772.8
CDP	35712.8	38797.2	28014.4	44558.6	40124.8	33308.8
CMP	36112.9	33558.1	35723.4	47541.3	15214.8	44684.1
UTP	58698.2	92385.3	111595	95718.6	123259	99767.1
UDP	257114	324712	261823	274672	172048	253678
UMP	554949	373178	295379	223694	185870	319052
IMP	22404.8	11332.2	9646.6	0	498.372	1312.24
Inosine	66904.9	53890.8	45588.8	80903.9	72383.6	84930.1
Hypoxanthine	522433	459167	358330	538016	333554	577925
Xanthine	14821.9	36419.1	29003.3	0	61345.1	0
5-Hydroxyisourate	22301	18604.2	14305	45490.7	56028.4	66693.9
Urate	76398.2	106630	100195	33490.7	66741	22139.8
5-6-Dihydrothymine	193932	204308	200327	174366	176312	184619
Pyridoxal	260161	57149	203175	220625	657883	310664
Nicotinamide	1872223	2128458	1983861	1730696	2172688	1818313
UDP-glucose	247006	268399	240325	281457	249109	266107
NADP+	23332.2	21422.1	25387.3	26899.2	28642.1	30693.4
NAD+	22622	32068.5	32400.8	17545.5	17200.9	26553.1
Phosphate	10029110	8334678	9006987	10822020	6877160	8280002
Diphosphate	3868574	4949528	6190146	5438750	5246742	5295100
D-Glucose	75631.1	79672.9	91656.8	124390	120236	130489
D-Hexose-phosphate	207652	242733	236342	272329	278599	330997
D-Fructose 1-6-bisphosphate	111328	119788	126828	154596	158390	154632
D-Glyceraldehyde 3-phosphate/Glycerone phosphate	125813	125768	126909	222992	213362	229979
1-3-Bisphosphoglycerate	31670.7	37391.1	29297	52772.4	52530.1	52784.5
2/3-Phospho-D-glycerate	524821	701787	987219	861644	894490	1210564
Phosphoenolpyruvate	150954	204580	236180	165456	142738	206514
Pyruvate	66993.5	105433	72541.7	116099	114998	154156
Lactate	1670962	1474458	1073678	1166483	1393928	1302405
Mannitol	205901	233006	286320	414758	328373	332899
D-Arabitol	23568.2	56051.1	31434.7	131936	75016.2	78628.4
Citrate	3227308	4031875	5368136	5831800	5006890	6684384
2-Oxoglutarate	61070.2	128676	101789	302154	270244	313278
Succinate	220574	249385	245600	552640	525559	324365
Fumarate	182729	232850	258943	525888	357332	460622
Malate	2930173	4027367	4833558	9464791	8314222	7797970
2-Hydroxyglutarate/Citramalate	369039	540520	621610	623952	514529	552530
6-Phospho-D-gluconate	6110.53	5454.91	4882.96	8413.99	8766.05	9677.18
Sedoheptulose 7-phosphate	12794.3	9207.9	4431.39	15422.9	18033	27202.1
Pentose phosphates (isobars)	125927	143796	143116	176725	172946	231454
Glutathione	1466827	1309312	1157572	2101301	1232340	1646954
Glutathione disulfide	1120.25	1660	2771.52	60418.3	55543.1	57541.4
5-Oxoproline	1742046	1480908	1220737	2776398	1923699	3105154
S-Glutathionyl-L-cysteine	0	0	0	8830.54	18691.2	8441.28
Cys-Gly	836.948	1028.3	1900.42	6340.37	2316.94	5822.27
Ascorbate	3036.56	4542.39	6419.22	5424.4	4378.24	5512.52
Dehydroascorbate	171837	213888	185578	596006	603180	911504
gamma-L-Glutamyl-L-cysteine	103251	102043	109476	242503	216856	218463
gamma-L-Glutamyl-D-alanine	115251	134054	58262.4	269162	345216	284906
gamma-Glutamyl-gamma-aminobutyrate	96415.3	115841	103871	301394	224436	297997
gamma-L-Glutamylputrescine	136847	169354	164674	111029	102429	127384
(5-L-Glutamyl)-L-glutamine	6079.37	7672.03	0	13947.2	11051.4	23197.8
Dimethylglycine	592031	727999	584735	829240	837899	998960
S-Adenosyl-L-methionine	38671.9	24107.7	21982.2	22474.5	12617	19522
Ornithine	0	0	15901	203715	233518	162019
L-Citrulline	28653.6	24092.2	17932.1	4796.32	8259.21	17318.6
Putrescine	946957	964493	742925	1116962	1188430	1033503
Spermidine	1817062	1964557	1584092	6014076	4137100	4569882
Spermine	86070.6	141746	111904	194121	209624	156731
N-Acetylneuraminate	27117.8	48382.2	47391.5	46632.1	44091.6	47099.1
N-Glycoloyl-neuraminate	75483.3	95884.6	55635.3	64010.9	50922.8	99882.8
L-Arabinose	54977.5	31241.4	11400	149801	58413.4	187193
Asymmetric dimethyl arginine	85986.3	124009	94235.4	121231	149528	141371
Carnosine	15037.4	18011.3	15109.8	82882.6	91157.9	131432
Phosphocreatine	375432	460206	531823	335395	411679	522186
Creatine	43589200	51437440	42495280	48303300	42858480	34332660
Creatinine	382832	316379	351637	462580	394440	551666
4-Acetamidobutanoate	113755	48298.8	67812.1	54800.2	38154	45893.6
N-Acetylornithine	7689.23	8570.31	7582.11	129436	229500	227580
Pantothenol	32703.3	27119.3	26969.7	24542.1	25875.9	18505
Pantetheine 4--phosphate	139393	169138	194169	80530.6	63001.1	70961.8
Taurine	733362	616664	529653	510420	392653	507925
Hypotaurine	134125	50717.2	69518.7	104529	22585.1	125242
L-Methionine S-oxide	53883.8	121216	96764.8	237518	432706	163293
3-Methyleneoxindole	30429.1	33296.6	0	115613	104717	94497.6
Indole-3-acetate	30980.1	33002.4	35899.3	78062.5	50245.7	67885.4
g-Oxalo-crotonate	219375	187176	182139	212920	160288	231410
Glycerol 3-phosphate	151440	152883	273569	175375	224453	134803
Ethanolamine phosphate	515575	406256	449619	370544	374196	543074
N-Methylethanolamine phosphate	12827.8	10883.1	16602.9	0	7591.36	10001.8
Sphingosine	71305.1	91823	81605.3	55884.5	76888	86184.4
Sphingosine 1-phosphate (S1P)	108184	131786	104788	88665.8	97242.9	109374
L-Carnitine	1428021	1427094	1447595	2212528	2030291	2350510
Acetyl-L-carnitine	3201085	3250322	2910275	3413062	3812299	3677481
Propionyl-L-carnitine	471093	528551	523779	654557	581986	754721
Butanoyl-L-carnitine	43384.6	31096.7	37137.6	67361.1	79355.8	55001.3
Hydroxybutyrylcarnitine	18815	22801.4	14369.9	52372.9	56731.4	102106
Isovalerylcarnitine	81284.8	86267.1	101890	126064	133486	109105
Tiglylcarnitine	15261.8	27671.1	25712.4	18812.3	26786.2	26662
hexanoyl-L-carnitine	83668.3	94935.9	86331.8	96030.8	90586	106646
Methylglutarylcarnitine	2525.08	2773.75	15362.7	10877.8	8543.67	5566.55
L-Octanoylcarnitine	21645	16463.7	22664.4	32768.9	32097.7	31434.1
Decanoyl-L-carnitine	10332.3	13937.6	12022.5	9471.72	6261.17	18728.9
Decenoyl-L-carnitine	19569.2	17062.4	9846.63	10976.4	14131.7	15206.8
Dodecanoyl-carnitine	8713.33	2658.39	2098.09	8877.7	2344.43	7082.59
Dodecenoyl-carnitine	7390.46	7458.33	7385.4	5851.48	8783.27	10982.6
Tetradecanoyl-L-carnitine	27194	35308.8	32746.9	53295.2	43902.9	28275.9
Tetradecenoyl-L-carnitine	28126.1	41700.8	29151.4	25474.8	34422.1	27067.5
L-Palmitoylcarnitine	174479	90339.5	83211	172537	73497.6	150224
Hexadecenoyl-L-carnitine	24027.2	25647.7	17081.2	44647.1	22556	38349
Octadecanoyl-L-carnitine	17931.3	10823.9	7915.05	18806.8	0	12251.8
Octadecenoyl-L-carnitine	45453.8	64089.9	38691.8	41234.3	42807.5	49381.1
Octadecadienoic-L-carnitine	7916.54	4492.98	16029.2	75418.5	22061.9	36357.4
Propionic/Propanoic acid	12231700	10024640	10636540	12010880	9506443	11484110
Pentanoate (valerate)	24641.4	24945.2	24989.7	17922.3	28898.8	27514.6
Heptanoic acid	42776.8	40246.9	40153.6	56798.8	49609.2	40038.8
Octanoic acid (caprylate)	282838	278301	274608	283004	315224	261944
Nonanoic acid (pelargonate)	1439080	1481634	1380779	1755054	2796044	1625963
Decanoic acid (caprate)	2759346	2673689	2428329	2227148	2200817	2909614
Dodecanoic acid (lauric acid)	1702780	1237769	1695229	1114084	1323517	1415518
Tetradecanoic acid (myristic acid)	3672882	3438177	3717551	3610267	2334319	3475981
Hexadecanoic acid (palmitic acid)	40081760	24227640	35529560	41640740	39079000	45467510
Octadecanoic acid (stearic acid)	3698912	4143330	4625530	3874767	4405172	4606870
9-Oxononanoic acid	173142	161544	110556	96380.6	127705	105689
Myristoleic acid ((9Z)-Tetradecenoic acid)	157253	126725	181927	202001	156071	182954
Palmitoleic acid ((9Z)-Hexadecenoic acid)	2480866	1948098	2461838	2385673	1988683	1804203
Oleic acid ((9Z)-Octadecenoic acid)	19271230	18087280	18931610	12489000	17071840	17230370
trans-Oleic ((9E)-Octadecenoic acid)	19271230	18087280	18931610	12489000	17071840	17230370
Nervonic acid ((15Z)-Tetracosenoic acid)	119398	121632	117401	104696	111387	0
Linoleic acid ((9Z,12Z)-Octadecadienoic acid; 18:2n6)	3743875	5571248	4953636	5256042	6941906	5871268
a-Linolenic acid (Octadecatrienoic acid; 18:3n3)	118554	113387	125888	116641	132726	136219
Dihomo-g-Linolenic acid (20:3n6)	1218671	1319284	1475309	1067440	1064478	1406968
Arachidonic acid (Eicosatetraenoic acid; 20:4n6)	9015981	8584830	10365390	9766849	7453460	11593630
Eicosapentaenoic acid	306494	332704	205803	323135	318724	513996
Docosahexaenoic acid	4254742	4903504	4702530	5273808	5830096	6355530
Dodecanedioic acid	35571.6	38800.6	35085.2	39175.5	36485.7	40809.6
Adrenic acid (7,10,13,16-Docosatetraenoic acid; 22:4n6)	1673600	1838888	1990587	1833764	1624846	2290477
14-HDoHE	2033.11	4384.26	3115.91	14688.6	16711.7	22514.8
(8Z-11Z-14Z)-Icosatrienoic acid	1218671	1319284	1475309	1067440	1064478	1406968
(5Z-8Z-11Z-14Z-17Z)-Icosapentaenoic acid	306494	332704	205803	323135	318724	513996
(7Z-10Z-13Z-16Z-19Z)-Docosa-7-10-13-16-19-pentaenoic acid	2511756	2852760	3514230	2771795	2967606	4334198
Undecanoic acid	253555	261140	230422	236703	188035	235061
10_11-dihydroxy-octadecanoic acid	291758	241775	305448	312393	328929	289919
10_16-dihydroxy-hexadecanoic acid	93728.3	83597.5	76598	30647.5	66391	123134
6R_7S-epoxy-octadecanoic acid	116649	95465.8	96792.4	88643.9	125701	147220
Deoxycholate	136077	7915.7	15552.6	156009	3400.7	63425.2
13(S)-HODE	14939.5	12037.1	17594.8	18574.2	19159.1	20270.7
11(R)-HPETE/Leukotriene B4 (isobars)	5847.28	8628.56	6303.24	10546.5	13509.8	14141.8
9-HETE	16461.8	16135.4	10968.6	124325	173013	305245
12-13-DHOME	31471.1	29034.6	25752.3	29907.2	33254.4	56088.7
Prostaglandin A2	59279.6	68504.6	55367.3	93718.2	77760.6	72154.4
Prostaglandin D2/Thromboxane A2 (isobars)	1006906	653283	871678	985296	878414	1125900
Prostaglandin D3 (isobars)	20814	23067.8	36950.9	42538.6	32914.8	18111.5
Prostaglandin G2	71864.2	74328.1	94275.1	88017	84578.2	53010.6
2-3-Dinor-8-iso prostaglandin F2alpha	54738	65475.8	57104.1	69895.5	64653.1	51953.5
11beta-17beta-Dihydroxy-4-androsten-3-one	15157.2	9999.69	13528.8	15708.3	9618.19	13590.8
Biliverdin	1773.88	1374.86	3620.81	558686	157795	530173
Triacanthine	3201085	3250322	2910275	3413062	3812299	3677481
1-Hydroxy-2-aminoethylphosphonate	515575	406256	449619	370544	374196	543074
N5-Methyl-L-glutamine	596314	568649	529510	647440	753447	895373
beta-Butoxyethyl nicotinate	588378	636263	573394	464069	208096	491358
2-Deoxy-alpha-D-glucoside	569692	537171	524255	743212	532334	607128
N-Acyl-D-mannosaminolactone	815100	639740	422774	632628	586908	749184
N6-Methyl-L-lysine	261872	303063	246322	329428	260478	366646
Poly-gamma-D-glutamate	1742046	1480908	1220737	2776398	1923699	3105154
Glucosinolate	105745	154967	157894	181019	164306	109673
Vanillate	53573.6	165581	86424	43558.5	47966.5	46103.7
9-Oxononanoic acid	173142	161544	110556	96380.6	127705	105689
L-Noradrenaline	10417.8	9815.44	8202.64	10310.3	7404.76	10858.9
10-Hydroxydecanoic acid	28500.2	26788.7	27619.8	26565.3	23492.8	31729.5

## Sheet: Global (5MM)
5MM (+,-); Cell Samples from n2 [20190228_5MM.n2]								BMMs(+)PBS			BMMs(+)RBCs			BLANKS (BLK)					TECHMIXES (TM)			TM Stats
N.	Compound (Cmpd)	CmpdID	Pathway	Parent	MedMz	MedRt	Polarity	n2PBS01	n2PBS02	n2PBS03	n2RBC04	n2RBC05	n2RBC06	PostBLK1	BLK1	BLK2	BLK3	BLK4	TM1	TM2	TM3	STDEV.P	MEAN	CV	MEDIAN (PBS)	MEDIAN (RBC)	FOLD CHANGE (RBC/PBS)	P.VALUE
1	L-Alanine	C00041	Amino acids	90.0557	90.0557	0.664833	+	8798156	10400810	13409650	21558080	21936590	16483060	1351134	1050481	1027624	876754	411234	14448810	13328110	5159403	4.14027e+06	1.09788e+07	0.377116	10400810	21558080	2.07273	0.0146873	L-Alanine	*	Colour	Symbol	Meaning
2	L-Arginine	C00062	Amino acids	175.119	175.119	0.596477	+	5528512	6396712	8662522	11565350	11524780	10014830	1151867	0	209814	186786	114256	8483389	8850471	7200594	707296	8.17815e+06	0.086486	6396712	11524780	1.80167	0.0172515	L-Arginine	*		ns	P > 0.05
3	L-Asparagine	C00152	Amino acids	133.061	133.061	0.666674	+	814490	928595	1270757	1829765	2098891	1563145	182548	228140	191595	137995	57405.8	1005576	1274684	565275	292412	948512	0.308285	928595	1829765	1.97047	0.0161748	L-Asparagine	*		*	P ≤ 0.05
4	L-Aspartate	C00049	Amino acids	134.045	134.045	0.692829	+	3839533	3488822	4139421	7989826	6912950	5031736	266921	185191	182350	156419	29301.2	4154075	4639962	1860344	1.21214e+06	3.55146e+06	0.341308	3839533	6912950	1.80047	0.0332023	L-Aspartate	*		**	P ≤ 0.01
5	L-Cysteine	C00097	Amino acids	122.027	122.027	0.672996	+	1365006	1382925	2027633	1214952	1262223	866243	0	0	0	2961.43	3451.34	1114393	1224329	386814	371616	908512	0.409038	1382925	1214952	0.878538	0.130159	L-Cysteine	ns		***	P ≤ 0.001
6	L-Glutamate	C00025	Amino acids	148.06	148.06	0.681659	+	6949216	7692626	8293182	13302830	13642580	9604000	464410	329836	227951	216546	146532	8633722	9646259	3959371	2.4769e+06	7.41312e+06	0.334124	7692626	13302830	1.7293	0.0282923	L-Glutamate	*		****	P ≤ 0.0001
7	L-Glutamine	C00064	Amino acids	147.076	147.076	0.665899	+	4435968	5192974	6374594	8005740	8518429	6302726	3307310	3591037	3369418	2740484	1154827	4888204	6016420	3776662	914386	4893762	0.186847	5192974	8005740	1.54165	0.0601995	L-Glutamine	*
8	Glycine	C00037	Amino acids	76.0402	76.0402	0.659717	+	2804337	2760567	3751398	4738180	4842046	4282664	1971794	2042553	1948322	1698671	379592	3632980	3975505	2866928	463453	3.4918e+06	0.132726	2804337	4738180	1.68959	0.014373	Glycine	*
9	L-Histidine	C00135	Amino acids	156.077	156.077	0.666713	+	1723092	2009659	2867010	4133549	5170688	4164801	652703	396820	375193	241384	54547.6	2939326	2823988	2222400	314324	2.6619e+06	0.118082	2009659	4164801	2.07239	0.00908879	L-Histidine	**
10	L-Leucine/Isoleucine	C00123/C00407	Amino acids	132.102	132.102	0.673231	+	62860610	76012580	100934000	105149300	143660700	108915300	4461167	3783939	3675609	2842092	862407	91131200	93772420	50002150	2.004e+07	7.83019e+07	0.255932	76012580	108915300	1.43286	0.0767643	L-Leucine	ns
11	L-Lysine	C00047	Amino acids	147.113	147.113	0.60542	+	2093569	1992588	3486279	5546944	4524265	4352926	0	616060	64630.2	619290	62855.3	3423383	4612373	6270926	1.16776e+06	4768894	0.24487	2093569	4524265	2.16103	0.019972	L-Methionine	*
12	L-Methionine	C00073	Amino acids	150.058	150.058	0.671664	+	10196480	11389280	15801390	15236000	19384640	14238830	148593	103933	117383	78633.9	32111.5	12946480	13788140	7509960	2.78248e+06	11414860	0.243759	11389280	15236000	1.33775	0.174817	L-Phenylalanine	ns
13	L-Phenylalanine	C00079	Amino acids	166.086	166.086	0.672448	+	11501990	14487620	18395890	19645160	25284310	19431050	611808	441846	370645	289011	136262	14793210	15515750	8806926	3.00677e+06	1.30386e+07	0.230605	14487620	19645160	1.356	0.0738525	L-Proline	ns
14	L-Proline	C00148	Amino acids	116.071	116.071	0.665163	+	13482420	14645070	19580560	29131990	33647540	23882360	1481653	1222555	1413995	1292448	993602	21482300	21543170	7949088	6.39401e+06	1.69915e+07	0.376306	14645070	29131990	1.9892	0.0185177	L-Serine	*
15	L-Serine	C00065	Amino acids	106.05	106.05	0.665521	+	2345044	2408710	3673633	4446456	4668253	3835345	923134	951899	704854	606383	242456	3386779	3410624	1140756	1.06445e+06	2646053	0.402278	2408710	4446456	1.84599	0.0391655	L-Threonine	*
16	L-Threonine	C00188	Amino acids	120.066	120.066	0.662893	+	3436979	3437887	4718400	6114282	6874776	5178724	602842	577738	497369	404215	175385	4511430	4777624	1665865	1.40835e+06	3.65164e+06	0.385677	3437887	6114282	1.7785	0.0280436	L-Tryptophan	*
17	L-Tryptophan	C00078	Amino acids	205.097	205.097	0.792668	+	9841234	10054960	10146460	16996700	15708620	18215740	98428.3	92213.2	89993.4	83700.9	0	12748560	18022210	4378635	5.61757e+06	1.17165e+07	0.47946	10054960	16996700	1.69038	0.000674063	L-Tyrosine	***
18	L-Tyrosine	C00082	Amino acids	182.081	182.081	0.666318	+	3225953	3938091	5151616	4862426	6241344	5193806	500174	466243	441163	356150	152245	3955956	4642306	3745208	383011	4114490	0.0930883	3938091	5193806	1.31886	0.130437	L-Valine	ns
19	L-Valine	C00183	Amino acids	118.087	118.087	0.681181	+	21606540	24162940	35660310	42203540	51238520	41065800	3636303	1043301	3515346	3515492	4037569	34291310	34474850	11681900	1.07017e+07	26816020	0.399079	24162940	42203540	1.74662	0.0304026	L-Cystine	*
20	L-Cystine	C00491	Amino acids	241.031	241.031	0.677405	+	113884	96570.3	61669.2	154671	295457	232102	37648.6	12228.8	15875.4	11206.4	95877.7	137197	130609	15869	55706.8	94558.5	0.589126	96570.3	232102	2.40345	0.034783		*
21	Adenosine	C00212	Nucleotides	266.089	266.088	0.658148	-	990134	1180425	1756750	1667502	1272978	985786	8663.29	0	15093.3	4901.45	23120.1	1169648	1515635	1114905	177416	1.26673e+06	0.140058	1180425	1272978	1.07841	0.999142
22	Adenine	C00147	Nucleotides	134.047	134.047	0.641879	-	1498431	383932	549106	964294	1373302	914854	113342	10154	57409.4	42637.9	145870	310733	737544	1031951	296085	693409	0.426999	549106	964294	1.75612	0.507491
23	GMP	C00144	Nucleotides	362.051	362.051	0.626626	-	1415582	330773	305992	527718	1326692	787194	3708.31	3008.92	0	0	0	178985	590564	1050245	355871	606598	0.586667	330773	787194	2.37986	0.674972
24	dGMP	C00362	Nucleotides	348.07	348.07	0.755697	+	398370	490725	451682	406438	265112	509803	31244.7	35472.9	53166.6	52196.9	2521.65	452102	426884	151448	136175	343478	0.39646	451682	406438	0.899832	0.521908
25	Guanine	C00242	Nucleotides	152.055	152.055	0.66538	+	420040	501832	665611	560361	751959	630859	0	0	0	3165.4	0	520852	659879	342060	130087	507597	0.25628	501832	630859	1.25711	0.26404
26	CMP	C00055	Nucleotides	322.045	322.045	0.627472	-	141902	136139	82859.3	111566	263582	244746	0	0	0	1984.49	0	31379	167568	167362	64151.8	122103	0.52539	136139	244746	1.79777	0.168345
27	dCMP	C00239	Nucleotides	306.055	306.055	0.840895	-	72396.8	75572.5	101707	59699.5	93730.6	142401	0	0	0	0	0	42175.7	94250.8	68006.9	21259.8	68144.5	0.311981	75572.5	93730.6	1.24027	0.582122
28	Cytidine	C00475	Nucleotides	242.078	242.078	0.658067	-	166620	108900	143655	250941	217861	185433	13187	4604.25	1563.39	2029.84	8172.92	112344	208235	230440	51245.2	183673	0.279003	143655	217861	1.51656	0.0362444
29	UMP	C00105	Nucleotides	323.029	323.029	0.624177	-	3270553	2067443	1670282	1327197	2578897	2906345	16336.5	0	0	1165.29	3428.78	616691	1996280	2278584	726089	1.63052e+06	0.445312	2067443	2578897	1.24738	0.928184
30	Inosine	C00294	Nucleotides	267.073	267.073	0.660013	-	2911606	1840786	2148476	6257972	4906559	3063327	88590.3	0	4082.89	28512	101302	3106770	3312561	2571536	312329	2.99696e+06	0.104215	2148476	4906559	2.28374	0.0671515
31	Hypoxanthine	C00262	Nucleotides	135.03	135.03	0.658912	-	6351902	6021014	7192966	8145684	7658654	9330652	0	0	0	0	22373.8	6552772	8450915	5430992	1.24638e+06	6.81156e+06	0.182981	6351902	8145684	1.2824	0.0376813
32	Xanthine	C00385	Nucleotides	151.025	151.025	0.656473	-	10495720	8258970	9389772	12886360	13172130	12208090	66392.2	3746.35	4577.86	10023.3	99922.9	9513929	12415420	9283476	1.4252e+06	10404275	0.136982	9389772	12886360	1.37238	0.00878843
33	5-Hydroxyisourate	C11821	Nucleotides	183.016	183.016	0.637093	-	203014	181181	177945	195803	252734	202986	8704.08	0	1233.5	1460.93	22164.7	232352	156091	163124	34412.2	183856	0.18717	181181	202986	1.12035	0.202277
34	Urate	C00366	Nucleotides	167.02	167.02	0.640203	-	5542894	2355859	2099981	2250966	4138809	2774004	974244	3571.79	3693.75	8016.09	64484.1	2815743	2943424	3230698	173531	2.99662e+06	0.0579088	2355859	2774004	1.17749	0.833699
35	5'-Phosphoribosyl-N-formylglycinamide	C04376	Nucleotides	315.062	315.062	2.45443	+	72153.6	87217.5	86766.4	99841.9	108378	82245.3	82447	68993.8	72859.5	25144.7	0	92508.5	69966.2	92358.5	10591.4	84944.4	0.124686	86766.4	99841.9	1.1507	0.181539
36	Pyridoxal	C00250	Nucleotides	166.05	166.05	0.671575	-	569085	387872	448630	1030690	956204	675133	10454.7	4319.83	3419.76	6301.87	3042.45	658943	627681	557158	42571.3	614594	0.0692673	448630	956204	2.13139	0.0255521
37	4-Pyridoxate	C00847	Nucleotides	182.043	182.043	0.660981	-	261929	205828	331048	569717	642471	529723	15981	0	2099.51	2541.77	24642.6	265481	460352	334536	80672.9	353456	0.22824	261929	569717	2.17508	0.00303221
38	Nicotinamide	C00153	Nucleotides	123.055	123.055	0.810203	+	12608980	16126920	17538650	16472090	18416440	18605250	486976	409888	440882	467342	386692	19824230	16964590	2766644	7.45893e+06	1.31852e+07	0.565707	16126920	18416440	1.14197	0.210814
39	5-Phosphoribosylamine	C03090	Nucleotides	230.045	230.045	0.851132	+	688593	886391	1189151	1147818	1288769	1043857	0	7094.73	9217.12	6006.93	38398.2	1380105	903679	57833.4	546793	780539	0.700532	886391	1147818	1.29493	0.214365
40	UDP-glucose	C00029	Nucleotides	565.048	565.048	0.57935	-	360041	398933	455197	462630	456650	471979	0	0	0	0	0	377274	459215	438304	34763.4	424931	0.0818096	398933	462630	1.15967	0.102519
41	ADP-D-ribose	C01882	Nucleotides	558.064	558.064	0.610466	-	305380	339469	338307	388415	485808	364606	0	0	0	0	0	234684	423206	333486	76993.4	330459	0.232989	338307	388415	1.14811	0.0925606
42	Phosphate (orthophosphate)	C00009	Phosphates	96.9681	96.9681	0.622327	-	110383400	94047960	66886560	68387640	116714600	120368000	2629041	1060039	160407	251837	448476	63628510	83309920	87550890	1.04223e+07	7.81631e+07	0.133341	94047960	116714600	1.24101	0.616737
43	Diphosphate	C00013	Phosphates	176.935	176.935	0.61322	-	3832093	2706660	1946856	1886028	3707891	3599842	5470.33	0	0	0	0	863561	2495487	2780912	844649	2.04665e+06	0.412698	2706660	3599842	1.32999	0.783944
44	D-Glucose	C00031	Glycolysis	179.055	179.055	0.664569	-	458607	510067	615316	559123	744865	725857	4347200	60433	274207	520175	7304700	299550	638755	518409	140413	485571	0.289171	510067	725857	1.42306	0.118182
45	D-Glucose 6-phosphate	C02965	Glycolysis	259.022	259.022	0.615121	-	2472990	2972734	2645237	4078761	4417280	4223294	11872.2	0	0	0	0	3113178	3527108	3536891	197475	3.39239e+06	0.0582111	2645237	4223294	1.59657	0.000940814
46	D-Fructose 1-6-bisphosphate	C00354	Glycolysis	338.989	338.989	0.596651	-	78140.4	80281.6	64580.2	112687	148484	131903	0	0	0	0	0	0	139778	136916	65228	92231.6	0.70722	78140.4	131903	1.68803	0.00775879
47	D-Glyceraldehyde 3-phosphate/Glycerone phosphate	C00118	Glycolysis	168.99	168.99	0.611047	-	1026754	1019055	814938	731488	889924	1157713	0	0	0	0	0	598166	886993	890169	136909	791776	0.172914	1019055	889924	0.873283	0.857795
48	2/3-Phospho-D-glycerate	C00631	Glycolysis	184.985	184.985	0.60717	-	5205412	7031204	6018058	6405070	7838184	7386018	11677.1	0	1477.99	7698.05	0	2372749	7268624	6802802	2.20635e+06	5.48139e+06	0.402517	6018058	7386018	1.22731	0.171756
49	Phosphoenolpyruvate	C00074	Glycolysis	166.974	166.974	0.598035	-	1684859	2416780	2160850	1228965	1845954	2535987	0	0	0	0	0	650300	2378544	1872889	725506	1.63391e+06	0.444031	2160850	1845954	0.854272	0.64316
50	Pyruvate	C00022	Glycolysis	87.0072	87.0072	0.627431	-	846589	618009	667219	613972	973089	613255	611900	3124441	704337	562428	720692	421399	804261	704349	162147	643336	0.252042	667219	613972	0.920195	0.877052
51	Lactate	C01432	Glycolysis	89.0229	89.0229	0.62865	-	5952386	4075425	4651290	4305512	6165332	4333324	11356590	16063140	5133666	4534136	12260300	5815640	5198710	4617414	489246	5210588	0.0938945	4651290	4333324	0.931639	0.962293
52	Maltose	C00208	Other sugars	341.108	341.108	1.80416	-	46985.1	45219.5	47170.8	43501	42910.2	49025.6	50815.8	0	0	23136	45602.9	43365.7	31748.4	45068.7	5918.81	40060.9	0.147745	46985.1	43501	0.925847	0.55571
53	Mannitol	C00392	Other sugars	181.07	181.07	0.651104	-	304849	269448	420763	367119	405614	395788	462418	69425.8	51754	69564.1	676961	301477	285444	365588	34625.7	317503	0.109056	304849	395788	1.29831	0.287182
54	D-Ribose	C00121	Other sugars	151.062	151.062	0.648601	+	509372	697538	862974	829129	1091333	714750	0	4312.38	0	5524.31	1623.04	696727	714834	396159	146144	602574	0.242533	697538	829129	1.18865	0.280631
55	Citrate	C00158	TCA cycle	191.019	191.019	0.606562	-	2238508	1423172	1078413	1711042	2078115	1576402	0	102493	6433.57	0	0	499008	1550637	1335348	453595	1.12833e+06	0.402005	1423172	1711042	1.20227	0.608053
56	2-Oxoglutarate (alpha-ketoglutarate)	C00026	TCA cycle	145.013	145.013	0.5866	-	136534	238380	171221	344944	352955	363964	14012.2	4182	1618.21	3471.76	6934.3	193789	313418	230142	50074.8	245783	0.203736	171221	352955	2.0614	0.00481783
57	Succinate	C00042	TCA cycle	117.018	117.018	0.619564	-	1938046	1372793	1315508	1102028	1999633	1945794	1029600	159262	67747.5	86902.3	616156	908066	1523216	1902494	409763	1.44459e+06	0.283653	1372793	1945794	1.4174	0.710466
58	Fumarate	C00122	TCA cycle	115.002	115.002	0.614467	-	806061	748765	564958	700635	783956	1068600	125193	15886	9747.34	24767.3	86658.8	468735	709598	658096	103562	612143	0.169179	748765	783956	1.047	0.338562
59	Malate	C00711	TCA cycle	133.013	133.013	0.602468	-	12230320	12142500	8180804	11702410	13503520	17295140	101154	23580	3964.22	12235.8	70847.8	6274930	10236270	11298370	2.16167e+06	9.26986e+06	0.233193	12142500	13503520	1.11209	0.19307
60	6-Phospho-D-gluconate	C00345	Pentose Phosphate Pathway	275.018	275.018	0.609792	-	288294	357050	498599	873345	1010404	662005	24941.2	3270.17	0	1623.63	1830.19	228854	719036	649873	216620	532588	0.406731	357050	873345	2.446	0.017032
61	D-Glucono-1-5-lactone 6-phosphate	C01236	Pentose Phosphate Pathway	257.007	257.007	0.596158	-	23965.8	23826.9	35656.6	60403	62447.8	73587.9	0	0	0	0	0	23351.8	54077.9	51501.9	13917.1	42977.2	0.323824	23965.8	62447.8	2.6057	0.00266687
62	Sedoheptulose 7-phosphate	C05382	Pentose Phosphate Pathway	289.033	289.033	0.615313	-	317220	385989	331462	663672	549818	508347	6050.86	0	1644.68	0	0	344625	434839	375843	37407.4	385102	0.0971362	331462	549818	1.65877	0.0108533
63	Pentose phosphates (isobars)	C00199	Pentose Phosphate Pathway	229.012	229.012	0.617828	-	4217410	4555660	3256139	5029390	4761792	4193175	9258.12	0	0	0	0	3284192	4494626	4278854	527158	4019224	0.131159	4217410	4761792	1.12908	0.230139
64	cis-Aconitate	C00417	C5-Branched Dibasic Acid Metabolism	173.008	173.008	0.606323	-	81060.2	135161	68797.7	104944	120124	91824.1	0	0	0	0	0	42175.1	105388	77468.7	25865.1	75010.7	0.344819	81060.2	104944	1.29465	0.653898
65	Itaconate	C00490	C5-Branched Dibasic Acid Metabolism	129.018	129.018	0.630252	-	261671	172862	203477	266354	414175	336551	67574.7	44049.1	20683.1	18117.9	53943.4	228260	285581	241520	24501.6	251787	0.097311	203477	336551	1.654	0.0648914
66	2-Hydroxyglutarate	C02630	C5-Branched Dibasic Acid Metabolism	147.029	147.029	0.619846	-	536126	522995	420650	840112	866046	778061	19006.2	4924.63	7977.77	7318.29	15336.2	395031	650834	625174	115017	557013	0.206489	522995	840112	1.60635	0.00172424
67	Propanoyl phosphate	C02876	C5-Branched Dibasic Acid Metabolism	152.995	152.995	0.609792	-	266393	151360	193843	276617	351219	314610	2317.16	0	1796.28	0	0	147109	274557	306551	68870.6	242739	0.283723	193843	314610	1.62302	0.0506256
68	Glutathione	C00051	GSH homeostasis	306.076	306.076	0.626369	-	4282392	674967	927792	2328217	4875996	2991928	0	0	0	0	0	626120	1624344	2944681	949589	1.73172e+06	0.548351	927792	2991928	3.22478	0.359841
69	5-Oxoproline	C01879	GSH homeostasis	128.034	128.034	0.619569	-	9067363	3879864	4064904	6466670	10367850	8041134	2544247	775360	330333	563975	4148522	1998896	5434598	9154488	2.92203e+06	5.52933e+06	0.52846	4064904	8041134	1.97819	0.268654
70	S-Glutathionyl-L-cysteine	C05526	GSH homeostasis	425.08	425.08	0.598325	-	2478.57	10982.2	11828.3	101765	155672	78322.2	0	0	0	1177.09	0	45825.9	23540.5	41708	9681.88	37024.8	0.261497	10982.2	101765	9.26636	0.0109774
71	gamma-L-Glutamyl-L-cysteine	C00669	Gamma-glutamyls	251.07	251.07	0.649546	+	518396	469199	406632	377617	391699	402333	22179.4	34083.9	26278.1	38667.2	17742.7	488081	345224	22736.5	194637	285347	0.682106	469199	391699	0.834825	0.0886311
72	gamma-L-Glutamyl-D-alanine	C03738	Gamma-glutamyls	217.083	217.083	0.603766	-	137022	141843	119850	327756	418088	140504	8131.4	0	1832.5	1869.49	6066.49	143522	188829	181997	19943.7	171450	0.116324	137022	327756	2.392	0.118547
73	3-Phosphonooxypyruvate	C03232	Serine biosynthesis and one-carbon metabolism	184.986	184.986	3.82342	+	18400480	17569880	15880700	15188360	14678220	21358700	25092160	17335090	11302840	9691844	7690142	16857490	15531540	22778900	3.15076e+06	18389310	0.171336	17569880	15188360	0.864454	0.93124
74	Ornithine	C01602	Urea cycle	131.081	131.081	0.798979	-	51411.2	53733.2	51931.7	83110.5	96176.8	74277.9	31628.8	0	1457.79	15718	52367.8	45032.7	44084.7	57426.8	6078.38	48848.1	0.124435	51931.7	83110.5	1.60038	0.00735566
75	Putrescine	C00134	Polyamines	89.1081	89.1081	0.564781	+	337330	387278	475671	745089	526185	717207	0	0	0	0	182957	575403	631390	671346	39350.2	626046	0.0628551	387278	717207	1.85192	0.0301501
76	Spermidine	C00315	Polyamines	146.165	146.165	0.687936	+	4585112	6159254	3402203	2320490	4290778	9296468	13081.7	39312.8	85915.9	223244	16901.3	4019129	3705020	8742.84	1.821e+06	2.57763e+06	0.706462	4585112	4290778	0.935807	0.804903
77	N-Acetylneuraminate	C00270	Aminosugars	308.099	308.099	0.614422	-	2199417	1709460	1437678	2516919	3018519	1941658	7826.78	0	0	0	30602	1433212	1705366	1511029	114450	1549869	0.0738452	1709460	2516919	1.47235	0.137083
78	N-Glycoloyl-neuraminate	C03410	Aminosugars	324.094	324.094	1.81688	-	253429	257699	240929	210004	227563	241538	355571	0	1957.27	101016	250496	191799	249979	226302	23888.4	222694	0.10727	253429	227563	0.897936	0.0798864
79	UDP-N-acetyl-D-glucosamine	C00043	Aminosugars	606.075	606.075	0.579357	-	439361	474238	563010	447228	456614	580921	0	0	0	0	0	448302	584650	480070	58249.7	504341	0.115497	474238	456614	0.962835	0.964048
80	CMP-N-acetylneuraminate	C00128	Aminosugars	613.14	613.14	0.582338	-	132152	145792	147347	170966	168293	185361	0	0	0	0	0	125507	164301	184848	24604.7	158219	0.155511	145792	170966	1.17267	0.00989068
81	Phosphocreatine	C02305	Arginine and proline metabolism	210.028	210.028	0.612614	-	555500	610478	607718	1074032	1131044	1016184	6532.85	0	0	0	0	596886	869081	922725	142649	796231	0.179155	607718	1074032	1.76732	0.000214167
82	Creatine	C00300	Arginine and proline metabolism	132.077	132.077	0.666021	+	29971280	28337670	24571100	46324440	40879820	33546030	350377	268452	325797	212887	112951	35702750	32119360	18293810	7.50598e+06	2.87053e+07	0.261484	28337670	40879820	1.4426	0.0351774
83	trans-4-Hydroxy-L-proline	C01157	Arginine and proline metabolism	130.05	130.05	0.631441	-	825549	799586	462466	1084998	1365438	1069427	45845.3	42212.4	23335.5	30250	48385.1	609375	723730	746449	59984	693185	0.0865339	799586	1084998	1.35695	0.0344111
84	5-Aminopentanoate	C00431	Arginine and proline metabolism	116.07	116.07	0.665306	-	5295262	4769134	6891944	8727263	10574640	9934423	634618	34696.6	82347.4	159860	635087	5315086	8213516	5769076	1.27289e+06	6.43256e+06	0.197883	5295262	9934423	1.8761	0.00810175
85	Pantothenol	C00864	Panthothenate metabolism	220.118	220.118	0.797392	+	427630	397323	308813	918365	654299	618692	34797.6	29367.8	48261.3	40287.3	8317.95	551168	678683	218370	194051	482740	0.401979	397323	654299	1.64677	0.0251256
86	Pantetheine	C00831	Panthothenate metabolism	279.137	279.137	0.794158	+	189370	174806	141847	368271	167139	124139	0	0	0	0	13556.5	214301	211005	22213.8	89784	149173	0.601877	174806	167139	0.956143	0.540366
87	Taurine	C00245	Sulfur metabolism	124.006	124.006	0.64313	-	5332234	3474978	3728624	7728936	6218688	5243298	87781.7	3990.27	2394.19	8043.51	136419	4650084	6175080	4702298	706905	5.17582e+06	0.136578	3728624	6218688	1.66782	0.0750951
88	Hypotaurine	C00519	Sulfur metabolism	110.028	110.028	0.680063	+	183094	145598	125678	332154	286747	269197	0	0	0	0	0	212101	226183	138038	38662.9	192107	0.201257	145598	286747	1.96944	0.00457394
89	L-Methionine S-oxide	C02989	Sulfur metabolism	166.053	166.053	0.757857	+	2643898	2985859	3752691	2982277	3136060	3841632	3931.25	11807.4	0	4050.79	88781.4	2874296	3686441	50266.2	1.55836e+06	2.20367e+06	0.707168	2985859	3136060	1.0503	0.671407
90	5-Hydroxyindoleacetate	C05635	Indole and Tryptophan	190.053	190.053	0.655185	-	622829	479353	860441	1170092	995560	883906	15218.7	3386.47	6607.49	0	17671.2	865470	838095	692052	76122.3	798539	0.095327	622829	995560	1.59845	0.0594769
91	g-Oxalo-crotonate ((Z)-5-Oxohex-2-enedioate)	C03453	Indole and Tryptophan	159.028	159.028	0.663204	+	5188730	5620570	5188538	7054744	7082854	7377374	8473.5	7603.2	0	4878.36	0	6755176	5391834	3069959	1.52135e+06	5072323	0.299932	5188730	7082854	1.36505	0.000485927
92	(sn-)Glycerol 3-phosphate	C00093	Glycerophospholipid biosynthesis	171.006	171.006	0.627664	-	1954004	2200126	1640441	2151431	1994029	2203228	5877.04	0	0	0	4204.38	1662339	1993271	1746809	140394	1.80081e+06	0.0779618	1954004	2151431	1.10104	0.347662
93	Ethanolamine phosphate	C00346	Glycerophospholipid biosynthesis	140.011	140.011	0.683333	-	1629902	1604738	1593280	2506687	2103868	1815551	92878.7	0	0	0	0	1691639	1769607	1654910	47823.1	1.70539e+06	0.0280424	1604738	2103868	1.31104	0.056736
94	Sphingosine 1-phosphate	C06124	Glycerophospholipid biosynthesis	378.24	378.24	2.99797	-	1053391	1258703	1067944	1171790	1438804	1286276	0	0	0	6009.25	9653.01	1206909	1305351	923921	161679	1.14539e+06	0.141156	1067944	1286276	1.20444	0.16574
95	sn-glycero-3-Phosphoethanolamine	C01233	Glycerophospholipid biosynthesis	214.048	214.048	0.616428	-	899149	357693	276791	561358	1018911	770482	9513.44	0	15850.8	10658.5	10477.5	270332	530165	527519	121868	442672	0.2753	357693	770482	2.15403	0.31257
96	Acetylcholine	C01996	Glycerophospholipid biosynthesis	146.118	146.118	0.662161	+	355915	383700	341176	598579	589477	533750	37092.1	16181.4	17571.9	29944.5	37409	517018	439476	291581	93515.8	416025	0.224784	355915	589477	1.65623	0.000850715
97	Choline	C00114	Glycerophospholipid biosynthesis	104.108	104.108	0.659012	+	40714840	43470420	47393020	68187600	60411240	56214360	1399877	1469036	1137562	1314120	299243	55845890	45613810	18559950	1.57298e+07	40006550	0.393181	43470420	60411240	1.38971	0.0114362
98	Sphinganine 1-phosphate	C01120	Sphingolipid biosynthesis	380.255	380.255	3.47892	-	990664	1019334	1090484	1139787	911375	910134	146261	0	98517.3	226530	515686	1149674	1021908	835348	129069	1.00231e+06	0.128772	1019334	911375	0.894089	0.601375
99	Isovalerylcarnitine (acyl-C5)	HMDB00688	Carnitine and fatty acid metabolism	244.155	244.155	1.85278	-	11557	0	2505.63	11671.4	91086	176254	0	0	3412.06	0	0	63930.4	74594	63975.3	5016.33	67499.9	0.0743161	2505.63	91086	36.3525	0.137442
100	Hexanoyl-L-carnitine (acyl-C6)	HMDB00756	Carnitine and fatty acid metabolism	258.171	258.171	1.89996	-	27712.1	2940.06	8693.46	75094.2	944382	2044858	0	0	2768.41	0	0	675165	632842	690962	24537.5	666323	0.0368252	8693.46	944382	108.631	0.151603
101	L-Octanoylcarnitine (acyl-C8)	HMDB00791	Carnitine and fatty acid metabolism	286.203	286.203	2.01691	-	82127.9	15306.1	17779.6	22293.2	449776	872409	2747.91	0	0	0	1812.8	110526	280382	289384	82274.7	226764	0.362821	17779.6	449776	25.2973	0.171628
102	O-Tetradecanoyl-L-carnitine (acyl-C14)	HMDB05066	Carnitine and fatty acid metabolism	370.296	370.296	2.68899	-	257191	419253	296592	378772	361302	348218	0	0	0	0	0	525714	394439	287908	97258.5	402687	0.241524	296592	361302	1.21818	0.48178
103	Hexadecenoyl-carnitine (acyl-C16:1)	HMDB06317	Carnitine and fatty acid metabolism	396.312	396.312	2.63998	-	115024	16656.2	38629.6	6538.38	400729	417206	0	0	0	0	0	260380	231872	167240	38965.7	219831	0.177253	38629.6	400729	10.3736	0.18795
104	acyl-C20:4	ac125	Carnitine and fatty acid metabolism	446.331	446.331	2.09553	-	54451	69158.1	86819.4	40615.1	85562.4	60803.5	0	0	0	0	0	60849.8	73030.4	75190.9	6313.13	69690.3	0.0905882	69158.1	60803.5	0.879194	0.651074
105	Octanoic acid (caprylic acid)	C06423	Saturated Fatty acids	143.107	143.107	2.01467	-	923751	747142	608525	639156	900097	848292	828086	2678.99	44514.1	271823	567116	462225	883136	1020310	237450	788557	0.301119	747142	848292	1.13538	0.780932
106	Nonanoic acid (pelargonic acid)	C01601	Saturated Fatty acids	157.122	157.122	2.11229	-	3094485	2356707	2402665	2049387	5034226	8199274	1630087	0	63085.4	490631	1142536	2660311	3893838	4900552	916136	3.81823e+06	0.239937	2402665	5034226	2.09527	0.239066
107	Decanoic acid (capric acid)	C01571	Saturated Fatty acids	171.138	171.138	2.1765	-	1494733	1320066	1266988	1013849	1412114	1554254	1230728	1742.5	46354.3	334591	759950	1008720	1801097	1904457	400124	1.57142e+06	0.254625	1320066	1412114	1.06973	0.856634
108	Icosanoic acid (arachidic acid)	C06425	Saturated Fatty acids	311.296	311.296	2.72905	-	400626	292876	548277	504754	226508	377778	412946	0	0	42873.2	35687.7	91075.1	328376	485826	162252	301759	0.537686	400626	377778	0.942969	0.706347
109	Dodecanoic acid (lauric acid)	C02679	Saturated Fatty acids	199.17	199.17	2.3696	-	1424576	1637182	1694398	1480861	1677979	1927276	1187962	0	31355.3	469160	815345	1390814	1582838	2060227	281442	1.67796e+06	0.167729	1637182	1677979	1.02492	0.512076
110	Tetradecanoic acid (myristic acid)	LMFA01010014	Saturated Fatty acids	227.201	227.201	2.61339	-	10443210	13807020	10576410	11411280	14723880	12219850	1303308	0	44442.6	488832	1207561	10406400	13141290	13698300	1.43861e+06	12415330	0.115874	10576410	12219850	1.15539	0.47254
111	Tridecanoic acid/Undecyl acetate	LMFA01010013	Saturated Fatty acids	213.185	213.185	2.47985	-	316438	317984	235251	255375	340267	381539	232724	0	11052.3	69998.7	154501	221966	227708	328560	48951.7	259411	0.188703	316438	340267	1.07531	0.480423
112	Hexadecanoic acid (palmitic acid)	C00249	Saturated Fatty acids	255.233	255.233	2.96522	-	189588300	212299300	194792000	188853600	244372700	232209000	36025070	0	1890048	11586300	27091450	149441200	229043800	242697900	4.11229e+07	2.07061e+08	0.198603	194792000	232209000	1.19209	0.276309
113	Octadecanoic acid (stearic acid)	C01530	Saturated Fatty acids	283.264	283.264	3.47974	-	108265400	98307550	108583700	106139200	117864600	98510170	23458680	0	3877159	10057660	24289480	108915800	120771000	127949300	7.8482e+06	1.19212e+08	0.0658339	108265400	106139200	0.980361	0.727579
114	Octadecanedioic acid	LMFA01170029	Saturated Fatty acids	313.239	313.238	2.82319	-	564605	752859	911311	907100	819710	807444	9264.03	0	13402.5	14161.9	22916.2	995582	871023	781613	87744.4	882739	0.0994002	752859	819710	1.0888	0.387097
115	Undecanoic acid	LMFA01010011	Saturated Fatty acids	185.154	185.154	2.2669	-	253790	253099	231265	269883	295674	302067	264754	0	9205.24	83271.6	132298	224685	247049	322878	42020.8	264871	0.158646	253099	295674	1.16821	0.0247482
116	(9Z)-Tetradecenoic acid (myristoleic acid)	C08322	Monounsaturated Fatty Acids	225.186	225.186	2.41377	-	375650	417654	367791	406412	535282	444028	65654	0	0	18750.8	43932.6	354846	433975	465780	46642.1	418200	0.111531	375650	444028	1.18202	0.14385
117	(9Z)-Hexadecenoic acid (palmitoleic acid)	C08362	Monounsaturated Fatty Acids	253.217	253.217	2.66056	-	22565060	23355630	24597620	31935250	29636990	25542290	622759	0	22715.2	193478	589238	29224870	28469700	28835910	308343	2.88435e+07	0.0106902	23355630	29636990	1.26894	0.0477753
118	(9Z)-Octadecenoic acid (oleic acid)	C00712	Monounsaturated Fatty Acids	281.249	281.249	3.00097	-	248689700	252050400	229768700	259548400	307355300	274772500	2294988	0	161788	708552	1659897	208394200	273659600	258601000	2.79027e+07	2.46885e+08	0.113019	248689700	274772500	1.10488	0.0778196
119	Icosenoic acid	C16526	Monounsaturated Fatty Acids	309.28	309.28	3.50758	-	11673150	11564900	12091320	13771140	14041020	12238320	50962.7	0	0	7020.23	40905.9	13592220	11823920	12777430	722646	12731190	0.0567618	11673150	13771140	1.17973	0.0543527
120	(13Z)-Docosenoic acid (erucic acid)	C08316	Monounsaturated Fatty Acids	337.311	337.311	2.75485	-	864293	664257	924322	851486	533626	618595	722192	0	0	0	0	0	754203	899872	394379	551358	0.715286	864293	618595	0.715723	0.291492
121	Icosadienoic acid	C16525	Polyunsaturated Fatty Acids	307.264	307.264	3.0675	-	16179690	16839420	14978800	14531410	17444170	15862890	23329.5	0	0	0	14888.5	14826140	17112890	15554710	953821	1.58312e+07	0.0602492	16179690	15862890	0.98042	0.96027
122	Eicosapentaenoic acid ((5Z,8Z,11Z,14Z,17Z)-Icosapentaenoic acid)	C06428	Polyunsaturated Fatty Acids	301.217	301.217	2.47513	-	3110119	3642186	3606257	5278534	5757642	4601186	84506.5	0	18367.5	35293	122403	4604975	4447188	4433374	77842.1	4495179	0.0173168	3606257	5278534	1.46372	0.00952369
123	(13Z,16Z)-Docosadienoic acid	C16533	Polyunsaturated Fatty Acids	335.295	335.295	3.57504	-	950081	913718	971761	1122732	951274	1018092	7325.94	0	0	0	0	1077214	1140129	831204	133297	1.01618e+06	0.131175	950081	1018092	1.07158	0.179927
124	Docosahexaenoic acid (4Z,7Z,10Z,13Z,16Z,19Z)	C06429	Polyunsaturated Fatty Acids	327.233	327.233	2.52947	-	28518800	35704210	36479150	54738200	43015980	35779540	36866.8	0	0	0	0	41363840	44636270	31456750	5.60316e+06	3.91523e+07	0.143112	35704210	43015980	1.20479	0.146107
125	Adrenic acid (7,10,13,16-Docosatetraenoic acid)	C16527	Polyunsaturated Fatty Acids	331.264	331.264	2.86471	-	29808370	28356980	25580850	28374540	30060670	30263380	36306.9	0	0	0	0	24760260	37473520	32326380	5.22139e+06	3.15201e+07	0.165653	28356980	30060670	1.06008	0.296799
126	Dihomo-gamma-linolenate ((8Z-11Z-14Z)-Icosatrienoic acid)	C03242	Essential fatty acids	305.249	305.249	2.78114	-	18039290	17146510	16172160	18443830	24590280	20251090	23612.6	0	0	0	0	16082850	21030550	20897870	2.30173e+06	19337090	0.119032	17146510	20251090	1.18106	0.104775
127	Docosapentaenoic acid ((7Z,10Z,13Z,16Z,19Z)-Docosa-7,10,13,16,19-pentaenoic acid)	C16513	Essential fatty acids	329.249	329.249	2.64255	-	26433520	25485380	27676760	43682450	36096620	32394680	20925.2	0	0	0	0	38119580	27672440	28507290	4.74032e+06	3.14331e+07	0.150807	26433520	36096620	1.36556	0.0325666
128	14/16/17-HDoHE	infllpd-25	Essential fatty acids	343.228	343.228	2.20489	-	59338.6	63324	60723.1	414168	405207	400264	0	0	0	0	0	212706	214511	236345	10743.2	221187	0.0485707	60723.1	405207	6.67303	1.35268e-07
129	Phosphatidylcholine (lecithin)	C00157	Phospholipids	310.073	310.074	0.666262	-	456912	288983	435207	598397	358398	341313	0	0	0	0	0	415830	484274	275245	87013.1	391783	0.222095	435207	358398	0.823512	0.711877
130	Cardiolipin (diphosphatidylglycerol)	C05980	Phospholipids	506.989	506.99	1.87386	-	84965.8	47582.8	50024.1	43667.1	65466.9	33199.4	0	0	0	0	0	124969	218354	257355	55545.5	200226	0.277414	50024.1	43667.1	0.872921	0.431999
131	Linoleic acid ((9Z,12Z)-Octadecadienoic acid; Linoleate)	C01595	Linoleic Acid Metabolism	279.233	279.233	2.70561	-	39800380	35431840	30186290	52909520	64778820	53040300	212050	0	7230.63	76394.3	187561	41798310	45754250	49009390	2.94854e+06	45520650	0.0647737	35431840	53040300	1.49697	0.0106656
132	a-Linolenic acid ((9Z,12Z,15Z)-Octadecadienoic acid)	C06427	Linoleic Acid Metabolism	277.217	277.217	2.53141	-	518791	587962	609722	846891	919513	846756	9206.27	0	2749.88	0	7592.09	646760	739900	694039	38025.5	693566	0.0548261	587962	846891	1.44038	0.0012223
133	9(S)/13(S)-HODE/9(10)-EpOME	infllpd-19	Linoleic Acid Metabolism	295.228	295.228	2.21085	-	198128	217363	246985	547527	612109	518121	29276	0	13585.3	20871.5	30493.2	403422	371990	416675	18739.2	397362	0.047159	217363	547527	2.51895	0.000409097
134	(±)9(10)/12(13)-DiHOME	infllpd-02	Linoleic Acid Metabolism	313.238	313.238	2.6488	-	323070	293854	301133	318431	407466	404062	7175.53	25902	2976.15	8965.53	7682.08	297719	306271	350746	23245.1	318245	0.0730416	301133	404062	1.34181	0.0809781
135	9/13-OxoODE	infllpd-18	Linoleic Acid Metabolism	293.207	293.207	2.96403	-	801601	1178977	1160208	1348626	1318135	956310	68552.6	0	10271.5	62257.9	133155	1221669	1270240	1123458	61055.1	1.20512e+06	0.050663	1160208	1318135	1.13612	0.412528
136	Arachidonic acid (Eicosatetraenoic acid; (5Z,8Z,11Z,14Z)-Icosatetraenoic acid)	C00219	Arachidonate Metabolism	303.233	303.233	2.61579	-	92776920	124493100	106797800	148281700	126581500	125875500	135310	0	2145.97	3529.16	34068.6	150206200	124299200	114229700	1.51543e+07	1.29578e+08	0.116951	106797800	126581500	1.18524	0.0954527
137	11(12)-DiHET	infllpd-24	Arachidonate Metabolism	337.235	337.235	2.96319	-	210572	319959	167144	231094	222569	251323	45446.7	0	19435	55368.5	137209	132339	194793	182808	27062.4	169980	0.159209	210572	231094	1.09746	0.960503
138	Prostaglandin A1 ((13E)-(15S)-15-Hydroxy-9-oxoprosta-10,13-dienoate)/PGB1/PGC1	C04685	Arachidonate Metabolism	335.223	335.223	2.1433	-	31848	39631.5	42295.1	203956	198835	175442	35493.4	0	36806.9	46896.3	46824.2	117449	136055	118232	8592.35	123912	0.0693423	39631.5	198835	5.01709	7.69111e-05
139	Prostaglandin D2/E2/Thromboxane A2 (isobars)	C00696	Arachidonate Metabolism	351.221	351.221	2.96399	-	4764360	5804758	5137734	5442282	6338684	4884452	1176780	0	185072	1128451	2192530	4263106	6125066	4969960	767449	5.11938e+06	0.149911	5137734	5442282	1.05928	0.573232
140	Prostaglandin E1 (Alprostadil)	C04741	Arachidonate Metabolism	353.233	353.233	2.0347	-	15513.9	15129.5	10331.5	49214.7	37965.2	34586	4074.11	50691.6	7015.61	11398.1	8792.25	31866.8	25695	27583.5	2582.12	28381.8	0.090978	15129.5	37965.2	2.50935	0.00468593
141	Prostaglandin D3 (isobars)	C13802	Arachidonate Metabolism	349.205	349.205	2.66047	-	166487	127496	156764	173075	277466	245849	0	0	0	7421.57	16284.3	418706	188024	187711	108819	264814	0.410925	156764	245849	1.56828	0.0684091
142	Thromboxane B2	C05963	Arachidonate Metabolism	369.228	369.228	1.83981	-	21068.8	23377.5	28452.6	43346.5	42991	47640.9	0	0	2327.72	0	2941.11	50644.8	36869.7	44466.7	5633.59	43993.7	0.128054	23377.5	43346.5	1.8542	0.00152948
143	Leukotriene B4 (isobars)/11(R)-HPETE	C02165	Arachidonate Metabolism	335.224	335.224	2.02792	-	28469.5	22057.6	56236.3	47870.7	45830.1	39985	30149.8	8533.03	19223.4	33817	41924.8	51693.4	39869.1	51605.1	5553.37	47722.5	0.116368	28469.5	45830.1	1.6098	0.450857
144	5(S)/8/9/11/12(S)/15(S)/20-HETE	infllpd-06	Arachidonate Metabolism	319.228	319.228	2.24737	-	237986	273008	236848	3259381	3058289	4084340	7593.13	0	4951.27	2214.2	11543.5	2354296	1912640	1586752	314534	1.95123e+06	0.161198	237986	3259381	13.6957	0.000511884
145	20-HETE	C14748	Arachidonate Metabolism	319.228	319.228	2.24737	-	237986	273008	236848	3259381	3058289	4084340	7593.13	0	4951.27	2214.2	11543.5	2354296	1912640	1586752	314534	1.95123e+06	0.161198	237986	3259381	13.6957	0.000511884
146	12-HEPE	infllpd-28	Arachidonate Metabolism	317.212	317.212	2.16527	-	21513.2	14698.5	25788.8	150516	179665	242804	20403.3	0	8413.86	42149.9	47536.4	159410	136038	99351	24719.1	131600	0.187835	21513.2	179665	8.35139	0.00342118
147	Pregnenolone	C01953	Sterols	315.233	315.233	2.53769	-	97434.9	90743.5	95270.6	141578	106853	116555	0	0	0	0	0	113751	137818	109935	12343.2	120501	0.102432	95270.6	116555	1.22341	0.0612638
148	Pregnenolone carbonitrile	C15637	Sterols	342.239	342.239	0.906408	+	131058	230974	331556	186386	229074	261754	0	0	0	0	0	220145	317419	49450.7	110758	195672	0.566039	230974	229074	0.991774	0.933925
149	Biliverdin	C00500	Hemolysis markers	583.254	583.254	1.92714	+	12750	0	0	756132	339678	446201	0	0	0	0	0	250461	198977	11398.5	102733	153612	0.668784	0	446201	#DIV/0!	0.015115
150	Triacanthine	C08435	Other	204.123	204.123	0.678847	+	1078049	1275905	1216506	1798134	1805454	1487851	55438.1	43932.1	60702.6	62933.2	129294	1212883	1438614	1260263	97187.3	1303920	0.0745347	1216506	1798134	1.47811	0.0134109
151	1-Hydroxy-2-aminoethylphosphonate	C05678	Other	142.026	142.026	0.696188	+	2817832	1908236	1895593	4011657	2789646	2737223	25164.7	21636.8	40937	58985.7	35390.6	2710298	2272448	964220	741767	1.98232e+06	0.374191	1908236	2789646	1.4619	0.132795
152	L-4-Hydroxyglutamate semialdehyde	C05938	Other	146.045	146.045	0.622233	-	24469970	19409860	13841970	31033220	32431410	27961860	526172	33166.3	40388.5	57546.7	609369	18990940	21215570	25209260	2.57263e+06	2.18053e+07	0.117982	19409860	31033220	1.59884	0.0282341
153	2-Deoxy-alpha-D-glucoside	C03573	Other	164.067	164.067	0.578273	+	693970	912040	882245	1251520	702195	1509532	398371	346586	26299	0	132362	1173759	1119184	1450578	145078	1.24784e+06	0.116263	882245	1251520	1.41856	0.25966
154	N-Acyl-D-mannosaminolactone	C03792	Other	203.043	203.043	0.647711	-	1421881	1382262	2409268	1257664	1307029	1550926	23209	15318.5	21096.3	55122.9	14024	2748987	1597284	1264958	635890	1.87041e+06	0.339974	1421881	1307029	0.919225	0.352277
155	S-Acylglutathione	C02589	Other	333.06	333.06	0.615307	-	772352	1026828	1042848	878481	952656	1166867	4144.21	0	0	8535.58	2891.42	1056288	1066195	966816	44695.8	1.02977e+06	0.0434038	1026828	952656	0.927766	0.694466
156	Vanillate	C06672	Other	167.036	167.036	2.2881	-	174107	171076	196410	165873	181671	176585	352036	19794.1	137391	229825	316175	167809	233653	370280	84325.3	257247	0.327799	174107	176585	1.01423	0.563101
157	9-Oxononanoic acid	C16322	Other	171.102	171.102	1.77595	-	526091	579683	586938	1030882	941415	1085981	305560	45955.3	223582	275814	335984	994259	967945	932400	25347.4	964868	0.0262704	579683	1030882	1.77836	0.000599653
158	N-Acyl-D-aspartate	C06380	Other	159.018	159.018	0.657571	-	331439	348822	506682	371609	304732	326503	0	31769.5	11737.4	3006.98	0	371641	388807	252581	60578.1	337676	0.179397	348822	326503	0.936017	0.357896
159	N-Acetylmethionine	C02712	Other	190.054	190.054	0.656891	-	622829	479353	860441	1170092	995560	883906	0	0	0	0	0	865470	838095	692052	76122.3	798539	0.095327	622829	995560	1.59845	0.0594769
160	Oxalosuccinate	C05379	Other	189.004	189.004	0.649355	-	120159	122185	205022	235469	250504	217647	0	0	6476.46	1749.42	1385.74	229520	234965	178266	25541.5	214251	0.119213	122185	235469	1.92715	0.044425
161	N-Carbamyl-L-glutamate	C05829	Other	189.051	189.051	0.594617	-	78099.8	120352	100884	188082	182100	174848	3367.12	0	3991.07	6139.39	2860.01	144497	122118	127062	9598.91	131226	0.0731481	100884	182100	1.80505	0.00305978
162	N-Tetradecanoylglycylpeptide	C03881	Other	340.237	340.237	2.57791	-	0	0	0	111854	79771.3	71112.2	0	0	0	0	0	37508.3	47274.6	44486.7	4107.57	43089.8	0.0953258	0	79771.3	#DIV/0!	0.00211491
163	Taxifolin	C01617	Other	303.051	303.051	0.662494	-	539330	490618	544597	1170503	886780	665899	3701.92	0	0	5860.34	6279.06	1089818	790682	616959	195294	832486	0.234591	539330	886780	1.64423	0.0598125
164	Protein N6-(lipoyl)lysine	C16237	Other	203.044	203.044	0.640186	-	1421881	1382262	2409268	1257664	1307029	1550926	0	15318.5	0	0	0	2748987	1597284	1264958	635890	1.87041e+06	0.339974	1421881	1307029	0.919225	0.352277
165	N-Carbamoylsarcosine	C01043	Other	131.045	131.045	0.634063	-	1735026	926533	1206185	2299112	2832430	2074412	117492	4649.45	0	32565.5	199025	1245577	1399422	2186139	411940	1.61038e+06	0.255803	1206185	2299112	1.9061	0.0271241
166	N-Acetyl-D-mannosamine/glucosamine 6-phosphate	C04257	Other	300.049	300.049	0.613857	-	218372	202870	139978	253617	224383	208978	0	0	2528.06	0	0	180720	201506	215413	14256	199213	0.0715614	202870	224383	1.10604	0.199602
167	Isocitrate	C00311	Other	191.019	191.019	0.613858	-	2238508	1423172	1078413	1711042	2078115	1576402	0	102493	4543.11	0	0	499008	1550637	1335348	453595	1.12833e+06	0.402005	1423172	1711042	1.20227	0.608053
168	D-Mannonate	C00514	Other	195.05	195.05	0.6237	-	473848	353684	329859	851991	1009014	621963	26968.6	4398.57	8056.46	12476.2	33481	376160	400182	528543	66894.5	434962	0.153794	353684	851991	2.40891	0.0216826
169	D-Altronate	C00817	Other	195.05	195.05	0.6237	-	473848	353684	329859	851991	1009014	621963	26968.6	4398.57	8056.46	12476.2	33481	376160	400182	528543	66894.5	434962	0.153794	353684	851991	2.40891	0.0216826
170	cis-3,4-Leucopelargonidin	C03648	Other	289.069	289.069	0.661455	-	1248349	846346	1439026	3097299	2133868	1660777	9589.02	0	2040.34	6123.76	28106.7	1641067	1621510	1007080	294363	1423219	0.206829	1248349	2133868	1.70935	0.070623
171	alpha-Ribazole	C05775	Other	277.123	277.123	1.72686	-	49581.1	37736.5	46254.4	128628	129864	53450.4	0	0	0	0	0	65842.4	88478.2	66207.9	10585.5	73509.5	0.144002	46254.4	128628	2.78087	0.0802099
172	6-Phospho-D-gluconate	C00345	Other	275.018	275.018	0.609792	-	288294	357050	498599	873345	1010404	662005	24941.2	3270.17	0	1623.63	1830.19	228854	719036	649873	216620	532588	0.406731	357050	873345	2.446	0.017032
173	5-Amino-6-(5'-phosphoribosylamino)uracil	C01268	Other	353.049	353.049	1.72668	-	81144.4	92255.2	101915	136542	174401	171357	18237.5	0	0	1599.09	57198.4	126685	150282	140051	9661.55	139006	0.0695046	92255.2	171357	1.85742	0.00701415
174	3-Ureidoisobutyrate	C05100	Other	145.061	145.061	0.65281	-	6562040	3084689	3481735	8186326	11758280	7291958	2242674	9199.43	172728	505359	4448692	4806258	5383868	7136896	990994	5775674	0.171581	3481735	8186326	2.35122	0.0549799
175	3-Methoxy-4-hydroxyphenylacetaldehyde	C05581	Other	165.055	165.055	1.96462	-	540781	648506	637154	670040	697012	557438	32991.2	6450.02	5588.13	16428.7	41261.2	668843	742889	696825	30528	702852	0.0434345	637154	670040	1.05161	0.582529
176	(Indole-3-yl)glycolaldehyde	C03230	Tryptophan Metabolism	176.066	176.066	0.667244	+	1791149	1550558	2653608	2300480	3228327	3067912	183721	199618	171168	233382	45930.2	3300637	2153115	232509	1.26574e+06	1.89542e+06	0.66779	1791149	3067912	1.71282	0.120423
177	9Z-Undecenoic acid	LMFA01030221	Lipids	183.138	183.138	1.77401	-	59509.8	71449	46075.9	151319	148185	160671	3348.1	3093.27	2026.66	2851.75	6167.1	122101	93695.9	112622	11808.1	109473	0.107863	59509.8	151319	2.54276	0.00033042
							Min	0
							Max	307355300

## Sheet: Global (17MM)
17min Method (-): Cell pellet Samples (2nd Extraction; 112018-47to51) [20190227_17MM Lipidomics]								BMMs(+)PBS			BMMs(+)RBCs			BLANKS (BLK)							TECHMIXES (TM)			TM Stats
N.	Compound (Cmpd)	CmpdID	Pathway	Parent	MedMz	MedRt	Polarity	47	48	49	50	51	52	Postblank0	Postblank1	Postblank2	Postblank3	Preblank1	Preblank2	Preblank3	TechMix1-	TechMix2-	TechMix3-	STDEV.P	MEAN	CV	MEDIAN (PBS)	MEDIAN (RBC)	FOLD CHANGE (RBC/PBS)	P.VALUE
1	Acetyl-carnitine (acyl-C2)	C02571	Carnitine and fatty acid metabolism	202.108	202.108	1.44123	-	16043.8	23604.3	58512.6	70341.1	31961.1	26283.2	4624.96	3989.3	4086.45	3955.55	1951.66	3218.05	3185.89	34697.9	36123.8	34688.1	674.5	35169.9	0.0191783	23604.3	31961.1	1.35404	0.622502			Symbol	Meaning
2	Hexanoyl-L-carnitine (acyl-C6)	HMDB00756	Carnitine and fatty acid metabolism	258.172	258.172	1.50029	-	29417.1	16244.3	25716.8	29252.5	43347.5	82149.5	0	225.743	402.492	0	0	212.377	306.889	26875	34544.5	30825.4	3131.51	30748.3	0.101843	25716.8	43347.5	1.68557	0.163301			ns	P > 0.05
3	L-Octanoylcarnitine (acyl-C8)	HMDB00791	Carnitine and fatty acid metabolism	284.187	284.187	1.53582	-	3084.8	0	1266.82	5222.48	22494	43962.3	0	0	224.056	0	276.962	0	0	15225.6	11355.1	7299.65	3236.05	11293.4	0.286542	1266.82	22494	17.7563	0.116579			*	P ≤ 0.05
4	Octenoyl-L-carnitine (acyl-C8:1)	ac111	Carnitine and fatty acid metabolism	286.203	286.203	3.62602	-	112802	44968.3	68663.4	73523.3	618218	1630193	1320.58	593.573	931.16	1130.86	282.871	543.404	662.71	388460	415298	411893	11930.4	405217	0.029442	68663.4	618218	9.0036	0.200733			**	P ≤ 0.01
5	O-Dodecenoyl-carnitine (acyl-C12:1)	HMDB13326	Carnitine and fatty acid metabolism	340.251	340.251	2.68401	-	1758042	1666831	1749123	1632611	1651802	1714815	0	0	0	0	0	0	0	1562886	1448034	1456013	52362.5	1.48898e+06	0.0351667	1749123	1651802	0.94436	0.201949			***	P ≤ 0.001
6	O-Tetradecanoyl-L-carnitine (acyl-C14)	HMDB05066	Carnitine and fatty acid metabolism	370.296	370.296	9.00803	-	74686.5	113040	96161.7	63644.7	77137.4	59940.5	0	0	0	0	0	0	0	74343.7	71361.4	66067.2	3422.55	70590.8	0.0484843	96161.7	63644.7	0.661851	0.0866897			****	P ≤ 0.0001
7	Tetradecenoyl Carnitine (acyl-C14:1)	HMDB13329	Carnitine and fatty acid metabolism	368.28	368.28	6.59421	-	17219.7	23373.8	24327.2	25429	21878.3	15451.5	0	0	0	0	0	0	0	18534.4	22158.2	15694.2	2645.38	18795.6	0.140745	23373.8	21878.3	0.93602	0.854008
8	L-Palmitoylcarnitine (acyl-C16)	C02990	Carnitine and fatty acid metabolism	398.336	398.336	10.9139	-	156770	138685	407820	202665	173388	93898.3	38455.8	43342.1	38672.5	41134.1	71917.9	54594.5	56776.6	240372	187530	170071	29887.2	199324	0.149943	156770	173388	1.106	0.44884
9	Octadecanoyl-L-carnitine (acyl-C18)	HMDB00848	Carnitine and fatty acid metabolism	426.367	426.367	11.7858	-	233755	169821	442769	212079	177395	121827	55283	72744.3	75167.8	75415.1	72667.3	72946.3	82017.4	237100	225630	212328	10122.3	225019	0.0449843	233755	177395	0.758892	0.266273
10	acyl-C20	ac124	Carnitine and fatty acid metabolism	456.414	456.414	7.85019	-	51441.6	42734.7	56918.2	54724.3	53299.2	62151.8	0	0	0	0	0	0	0	32447.5	51916.1	47619.2	8351.08	43994.3	0.189822	51441.6	54724.3	1.06381	0.268873
11	acyl-C20:4	ac125	Carnitine and fatty acid metabolism	446.331	446.331	9.3166	-	281729	310954	310577	252243	288130	267264	0	0	0	0	0	0	0	231657	257328	234748	11442.6	241244	0.0474317	310577	267264	0.860539	0.0883411
12	N-(acyl)-sphinganine	LMSP02020000	Carnitine and fatty acid metabolism	327.278	327.278	5.90921	-	10259450	10002460	10162150	12219390	12297120	12932650	3149.62	2286.16	2156.2	0	0	0	0	9810611	9668224	9378277	179894	9.61904e+06	0.0187019	10162150	12297120	1.21009	0.000598529
13	Nonanoic acid (pelargonic acid)	C01601	Saturated Fatty acids	157.122	157.122	4.0049	-	9688835	8540791	9155007	9254023	9003477	10662960	209920	192440	178673	172256	427717	365090	318902	7828460	8103774	8708350	367502	8213528	0.0447434	9155007	9254023	1.01082	0.451178
14	Decanoic acid (capric acid)	C01571	Saturated Fatty acids	171.138	171.138	4.72911	-	2606820	2336727	2894773	2837574	2582523	2848722	95309.8	92780.6	89495.8	89042.5	96787.3	96915.9	0	2218478	2547416	2507641	146590	2.42451e+06	0.0604616	2606820	2837574	1.08852	0.476962
15	Icosanoic acid (arachidic acid)	C06425	Saturated Fatty acids	311.296	311.296	11.4331	-	12800480	11656160	16296230	12747650	10533070	9408648	961932	1085530	1031442	986074	1178815	1088178	1063544	11949640	11408400	10599030	554994	1.1319e+07	0.049032	12800480	10533070	0.822865	0.190226
16	Docosanoic acid (behenic acid)	C08281	Saturated Fatty acids	339.327	339.327	12.3433	-	5936288	6227958	9089751	8790793	7236980	6535306	319312	501769	491887	517926	1875265	489169	489086	8127202	6993414	7267876	482959	7.46283e+06	0.0647153	6227958	7236980	1.16201	0.735946
17	Dodecanoic acid (lauric acid)	C02679	Saturated Fatty acids	199.17	199.17	6.29359	-	7152188	6007338	8183642	6273976	6097548	6800006	207662	193689	186453	189013	157396	183136	0	5950790	6259010	6430506	198477	6.21344e+06	0.0319432	7152188	6273976	0.877211	0.336262
18	Tetracosanoic acid (lignoceric acid)	LMFA01010024	Saturated Fatty acids	367.358	367.358	13.4009	-	3842519	4407314	6147248	5430397	4955486	3859947	419314	489252	534762	554401	1451144	0	508541	4671402	4392814	4474510	116929	4.51291e+06	0.0259099	4407314	4955486	1.12438	0.95475
19	Tetradecanoic acid (myristic acid)	C06424	Saturated Fatty acids	227.201	227.201	7.86328	-	51794110	53794600	64687550	58488610	56204930	54971080	954124	799790	783648	778776	503042	871414	746751	53903580	53906330	52991630	430547	5.36005e+07	0.00803252	53794600	56204930	1.04481	0.963054
20	Tridecanoic acid/Undecyl acetate	LMPR0103460001	Saturated Fatty acids	233.154	233.154	6.14516	-	5739978	5365794	5695226	1616445	1440536	2757220	24465.3	65580.1	19217.7	63858.6	67135.4	66602.6	63227.5	4812696	5234712	5295368	214670	5.11426e+06	0.0419748	5695226	1616445	0.283825	0.00103563
21	Hexadecanoic acid (palmitic acid)	C00249	Saturated Fatty acids	255.233	255.233	9.25742	-	493362000	503004100	575695300	496635900	476939400	470734300	25617930	23707180	23619080	22882240	7856292	20750600	20782150	509817700	476842500	463550200	1.945e+07	4.83403e+08	0.0402356	503004100	476939400	0.948182	0.191646
22	Octadecanoic acid (stearic acid)	C01530	Saturated Fatty acids	283.264	283.264	10.42	-	452062000	421537000	519652000	426077400	415418500	375904200	38177570	37332580	36552530	37291950	20410570	34483890	34173240	449743100	416476600	409786000	1.74738e+07	4.25335e+08	0.0410823	452062000	415418500	0.918941	0.148083
23	Octadecanedioic acid	LMFA01170029	Saturated Fatty acids	313.238	313.238	6.99526	-	231862	207923	308174	264440	252234	213926	31455.2	28211.2	28377.3	26784.2	15544.4	28723.9	28139	229510	228033	234040	2555.61	230528	0.0110859	231862	252234	1.08786	0.872538
24	Undecanoic acid	C17715	Saturated Fatty acids	185.154	185.154	5.49754	-	1075203	988880	1073376	1048604	1013224	1082265	59485.7	54643.7	54539.6	53909.9	73198.1	63248.1	60148.2	978382	1005303	1043077	26535.3	1.00892e+06	0.0263007	1073376	1048604	0.976921	0.952325
25	(9Z)-Tetradecenoic acid (myristoleic acid)	C08322	Monounsaturated Fatty Acids	225.185	225.186	6.82974	-	452274	500482	1821680	670783	542638	528935	32946.1	27257.6	26937.3	26613	27675.5	27537.3	27804.3	620428	679799	665489	25298.7	655239	0.0386099	500482	542638	1.08423	0.488009
26	(9Z)-Hexadecenoic acid (palmitoleic acid)	C08362	Monounsaturated Fatty Acids	253.217	253.217	8.16558	-	47615420	50908470	50944460	65514340	58325680	53830720	0	238115	0	0	185965	0	0	49069260	51542780	51043330	1.06795e+06	50551790	0.0211259	50908470	58325680	1.1457	0.0583034
27	(9Z)-Octadecenoic acid (oleic acid)	C00712	Monounsaturated Fatty Acids	281.248	281.248	9.46714	-	410905100	445718200	412022400	429959700	411940200	390382500	2012248	1571417	1460598	1336720	813019	1008758	992446	438408400	388007800	379566900	2.59782e+07	4.01994e+08	0.0646232	412022400	411940200	0.9998	0.495085
28	Icosenoic acid	C16526	Monounsaturated Fatty Acids	309.28	309.28	10.485	-	31336500	35050920	33468490	39414680	37344780	32273870	72012.2	56297.2	51186.8	49666.3	115122	42159.6	44038	34166280	31716290	31016660	1.35039e+06	3.22997e+07	0.0418081	33468490	37344780	1.11582	0.267796
29	(13Z)-Docosenoic acid (erucic acid)	C08316	Monounsaturated Fatty Acids	337.311	337.311	11.4172	-	9059117	9568892	10008440	10312120	10186560	9363771	181497	156960	159868	140474	877481	216676	195219	9420936	8602605	8563485	395308	8862342	0.0446054	9568892	10186560	1.06455	0.369591
30	(15Z)-Tetracosenoic acid (nervonic acid)	C08323	Monounsaturated Fatty Acids	365.342	365.342	12.2711	-	17331990	22713160	21384240	25619250	24911630	20642670	28706.4	26624	27111.7	27064.2	217322	28480.3	24471	24123820	19922100	19440990	2.1033e+06	2.11623e+07	0.099389	21384240	24911630	1.16495	0.221322
31	Dodecanedioic acid	C02678	Polyunsaturated Fatty Acids	229.144	229.144	1.65858	-	213141	185223	211497	320326	242734	241334	5726.86	5847.78	5806.41	5251.56	5748.61	5941.49	5875.81	37993.1	42002.1	36815.5	2220.09	38936.9	0.0570176	211497	242734	1.14769	0.078733
32	Stearidonic acid ((6Z,9Z,12Z,15Z)-Octadecatetraenoic acid)	C16300	Polyunsaturated Fatty Acids	275.202	275.202	6.97164	-	19701.6	20839.3	24003.1	66623.1	51631.6	56648.9	1983.33	1766.09	1048.78	1787.98	1125.62	1854.14	1611.88	35336.2	36440.3	38757	1425.47	36844.5	0.0386889	20839.3	56648.9	2.71836	0.00131472
33	Icosadienoic acid	C16525	Polyunsaturated Fatty Acids	307.264	307.264	9.74484	-	34456560	36459740	34109220	33454730	32248310	31700040	29370.1	18999.4	16862.2	15470.3	15443.2	12605	13190.8	28840760	31692610	32047590	1.43538e+06	30860320	0.0465121	34456560	32248310	0.935912	0.0472704
34	Eicosapentaenoic acid ((5Z,8Z,11Z,14Z,17Z)-Icosapentaenoic acid)	C06428	Polyunsaturated Fatty Acids	301.217	301.217	7.52026	-	4857062	5445016	5154178	6188444	5056654	5622452	6488.78	4256.15	3718.92	3519.54	30278.1	3411.43	1875.26	5569048	5190016	5104120	201990	5287728	0.0381999	5154178	5622452	1.09085	0.27046
35	(13Z,16Z)-Docosadienoic acid	C16533	Polyunsaturated Fatty Acids	335.296	335.295	10.691	-	2542914	2647755	2557450	3056757	2945420	2596225	3980.86	4728.42	5049.42	4649.47	25877.8	5843.15	4739.55	2697126	2553446	2423386	111800	2557986	0.0437063	2557450	2945420	1.1517	0.117688
36	Docosahexaenoic acid (4Z,7Z,10Z,13Z,16Z,19Z)	C06429	Polyunsaturated Fatty Acids	327.233	327.233	7.92138	-	79195010	77026870	76509090	68849650	59200090	62632720	17055.3	11823.5	8589.53	6390.42	7989.14	1770.87	583.923	71786650	71702920	67698860	1.90757e+06	7.03961e+07	0.0270977	77026870	62632720	0.813128	0.00887141
37	Adrenic acid (7,10,13,16-Docosatetraenoic acid)	C16527	Polyunsaturated Fatty Acids	331.265	331.265	9.30309	-	66838220	67316200	66688120	52338200	48683360	49652590	88243.5	75691.7	79838.2	66919	1561046	111965	99555.2	57622100	55595410	54386440	1.33494e+06	5.5868e+07	0.0238945	66838220	49652590	0.742877	0.000112898
38	Dihomo-gamma-linolenate ((8Z-11Z-14Z)-Icosatrienoic acid)	C03242	Essential fatty acids	305.248	305.248	9.11439	-	36970080	38796580	37377800	31345630	28764350	30267630	46707	30671.5	19825.1	16578.4	38662.1	5551.24	4373.65	29417750	31612160	31603580	1.03244e+06	30877830	0.0334362	37377800	30267630	0.809776	0.00123248
39	Docosapentaenoic acid ((7Z,10Z,13Z,16Z,19Z)-Docosa-7,10,13,16,19-pentaenoic acid)	C16513	Essential fatty acids	329.249	329.249	8.56648	-	117324300	114053800	112297400	80715110	74260470	78913540	17669.9	12223.1	8892.09	8486.08	34313	1987.67	1272.26	105494900	92161020	85340210	8.3701e+06	9.4332e+07	0.0887302	114053800	78913540	0.691898	0.000111874
40	14/16/17-HDoHE	infllpd-27	Essential fatty acids	343.229	343.229	5.46916	-	34730.8	25450.5	37522.4	532810	506329	629637	732.816	585.076	457.743	443.37	1861.8	1265.34	1033.66	266972	268177	310788	20377.2	281979	0.0722648	34730.8	532810	15.3411	0.000154986
41	Phosphatidylcholine (lecithin)	C00157	Phospholipids	310.074	310.074	1.40685	-	110704	104890	92474.7	89123.9	84176	89036	0	0	0	0	0	0	0	91136.6	75676.9	78583.2	6708.49	81798.9	0.0820119	104890	89036	0.848849	0.0533768
42	Phosphatidylinositol (1-Phosphatidyl-D-myo-inositol)	C01194	Phospholipids	387.035	387.035	9.91803	-	151738	185067	128133	236555	340003	245085	0	0	0	0	0	0	0	142778	159421	150917	6794.65	151039	0.0449862	151738	245085	1.61518	0.0325822
43	Plasmenylcholine	C00958	Phospholipids	309.102	309.102	1.04422	-	818902	728231	970795	1098387	904249	802728	0	0	0	806.867	254.88	0	239.446	1112918	926552	954786	82013	998085	0.0821703	818902	904249	1.10422	0.440276
44	Cardiolipin (diphosphatidylglycerol)	C05980	Phospholipids	506.99	506.99	4.51521	-	301162	271714	248966	288642	267874	314081	0	0	359.358	0	0	420.747	987.403	298518	345142	354699	24543.5	332786	0.0737515	271714	288642	1.0623	0.465564
45	Sphingomyelin	C00550	Phospholipids	491.322	491.322	9.48719	-	815108	771671	769684	798891	813185	836853	15937.5	3781.13	4106.85	3720.19	0	2638.54	3653.3	581355	791268	825651	107974	732758	0.147353	771671	813185	1.0538	0.171013
46	Glucosylceramide/Galactosylceramide	C01190	Glycolipids	487.309	487.308	1.54818	-	37466.6	22260.4	49051.4	47175.3	69523	27190.2	0	369.867	0	0	0	237.099	296.764	31848.3	28388.6	29675.1	1427.77	29970.7	0.047639	37466.6	47175.3	1.25913	0.464278
47	Linoleic acid ((9Z,12Z)-Octadecadienoic acid; Linoleate)	C01595	Linoleic Acid Metabolism	279.233	279.233	8.55904	-	61922120	67867420	68981770	93692220	87228350	88462840	251965	191215	112979	148087	96751.7	120792	115648	78013080	71674780	74050760	2.61447e+06	74579540	0.0350562	67867420	88462840	1.30347	0.0013444	Linoleic acid ((9Z,12Z)-Octadecadienoic acid; Linoleate)		**	LA
48	a-Linolenic acid ((9Z,12Z,15Z)-Octadecadienoic acid)	C06427	Linoleic Acid Metabolism	277.217	277.217	7.85034	-	11140920	9902229	10595500	8870299	8974698	10105970	10705.5	7392.93	7137.27	6451.26	4607.95	7100.28	6608.12	9237171	9371789	9390236	68224.5	9.33307e+06	0.00730997	10595500	8974698	0.847029	0.0827068	a-Linolenic acid ((9Z,12Z,15Z)-Octadecadienoic acid)		ns	ALA
49	Dihomo-g-linolenic acid	infllpd-11	Linoleic Acid Metabolism	305.249	305.249	8.95948	-	27190660	30311540	28927290	29042420	25525500	26112090	46707	29079	20355.5	14959.1	19217.2	2164.66	2495.14	29417750	25997310	25892140	1.63776e+06	27102400	0.0604287	28927290	26112090	0.90268	0.246684	Dihomo-g-linolenic acid		ns	DGLA
50	9(S)/13(S)-HODE/9(10)-EpOME	C14767	Linoleic Acid Metabolism	295.226	295.226	5.42924	-	22641790	22940970	21835330	19929500	21180630	22466130	14423.3	13669.9	10433.9	10807.4	3544.32	5162.22	5534.05	21198260	20474560	20335910	378097	2.06696e+07	0.0182924	22641790	21180630	0.935466	0.186111	9(S)/13(S)-HODE/9(10)-EpOME		ns
51	(±)9(10)/12(13)-DiHOME	C14829	Linoleic Acid Metabolism	313.236	313.236	4.37958	-	31211.9	32335.9	40288.1	1359449	1355049	1055438	7571.66	7438.3	5273.52	6579.02	6038.78	5435.61	5885.6	110383	106290	114138	3204.52	110270	0.0290605	32335.9	1355049	41.9054	0.000264072	(±)9(10)/12(13)-DiHOME		***
52	9-OxoODE	C14766	Linoleic Acid Metabolism	293.212	293.212	5.58778	-	1396705	1192363	1299165	1792337	1781531	1666559	3221.57	3328	3258.37	3031.71	0	1976.25	2164.76	1380404	1285756	1317404	39340.2	1.32785e+06	0.0296269	1299165	1781531	1.37129	0.00322478	9-OxoODE		**
53	13-OxoODE	C14765	Linoleic Acid Metabolism	293.212	293.212	5.46812	-	183119	204687	237727	516345	545254	500616	3987.19	3885.93	3015.7	2917.41	0	1945.18	1894.03	322529	328312	328106	2678.85	326315	0.00820938	204687	516345	2.52261	0.000109784	13-OxoODE		***
54	Arachidonic acid (Eicosatetraenoic acid; (5Z,8Z,11Z,14Z)-Icosatetraenoic acid)	C00219	Arachidonate Metabolism	303.233	303.233	8.31414	-	231453100	264716700	267055300	212436900	194207000	229798200	111732	80405	60529.2	49043.7	32101.9	5929.57	4412.9	234865800	207401900	212130800	1.19885e+07	2.18133e+08	0.0549594	264716700	212436900	0.802507	0.0518694	Arachidonic acid (Eicosatetraenoic acid; (5Z,8Z,11Z,14Z)-Icosatetraenoic acid)		ns	ARA
55	11(12)-DiHET	infllpd-24	Arachidonate Metabolism	337.236	337.236	9.25236	-	3715407	3533785	4020441	3116846	3274609	3301247	331880	452484	474804	464926	254162	372023	392867	4749756	3472520	3515788	592160	3912688	0.151344	3715407	3274609	0.881359	0.0265095	11(12)-DiHET		*
56	Prostaglandin A1 ((13E)-(15S)-15-Hydroxy-9-oxoprosta-10,13-dienoate)/PGB1/PGC1	C04685	Arachidonate Metabolism	335.221	335.221	3.46047	-	2463990	2515983	2626682	2208420	2217526	2376126	725.124	466.861	862.756	460.189	0	305.096	298.754	2251938	2103186	2092725	72713.6	2149283	0.0338315	2515983	2217526	0.881376	0.0209122	Prostaglandin A1 ((13E)-(15S)-15-Hydroxy-9-oxoprosta-10,13-dienoate)/PGB1/PGC1		*
57	Prostaglandin A2/PGB2/PGC2	C05953	Arachidonate Metabolism	333.207	333.207	3.51029	-	1419559	1478826	1452765	1290572	1318792	1420146	332.808	546.417	390.441	314.134	0	0	259.968	1273885	1209444	1248176	26486.4	1243835	0.0212941	1452765	1318792	0.907781	0.0668961	Prostaglandin A2/PGB2/PGC2		ns
58	Prostaglandin D1	C06438	Arachidonate Metabolism	353.233	353.233	5.27385	-	56255.3	50867.8	54926.8	55702	51984.1	54699.4	968.059	1476.62	442.546	569.896	0	741.293	798.753	46075.1	52561.6	50971.6	2760.39	49869.4	0.0553524	54926.8	54699.4	0.995861	0.957318	Prostaglandin D1		ns
59	Prostaglandin E1 (Alprostadil)	C04741	Arachidonate Metabolism	353.228	353.228	2.46556	-	18934.6	18040.8	15389	20003.8	19074.8	27045.6	0	0	0	0	0	0	0	9498.08	17218.3	12553.6	3174.52	13090	0.242515	18040.8	20003.8	1.10881	0.168525	Prostaglandin E1 (Alprostadil)		ns
60	Prostaglandin E2	C00584	Arachidonate Metabolism	351.218	351.218	3.43221	-	17798.4	24416.3	41823.8	381195	435655	407676	328.865	341.041	423.243	331.952	0	220.214	232.509	181416	182308	186024	1995.23	183249	0.0108881	24416.3	407676	16.6969	2.52555e-05	Prostaglandin E2		****
61	Prostaglandin G2	C05956	Arachidonate Metabolism	367.215	367.215	5.52483	-	165056	223752	959096	405268	182824	131987	2128.78	1751.89	2058.98	2039.86	2646.47	1107.93	1323.27	281519	327782	324075	20989.4	311125	0.0674629	223752	182824	0.817085	0.479865	Prostaglandin G2		ns
62	Thromboxane B2	C05963	Arachidonate Metabolism	369.222	369.223	2.36821	-	44592.2	42077.8	40904.1	63790.7	58456.2	53546	0	0	476.358	0	0	0	0	37374	38657.7	37365.9	607.043	37799.2	0.0160597	42077.8	58456.2	1.38924	0.0069855	Thromboxane B2		**
63	Leukotriene A4	C00909	Arachidonate Metabolism	317.21	317.21	3.44853	-	702398	695257	649819	604559	578431	625662	508.695	0	292.286	0	280.78	0	0	587308	538442	544088	21826.8	556612	0.0392137	695257	604559	0.869547	0.0204573	Leukotriene A4		*
64	Leukotriene B4 (isobars)/11(R)-HPETE	C02165	Arachidonate Metabolism	335.221	335.221	3.46047	-	2463990	2515983	2626682	2208420	2217526	2376126	725.124	466.861	862.756	460.189	0	305.096	298.754	2251938	2103186	2092725	72713.6	2149283	0.0338315	2515983	2217526	0.881376	0.0209122	Leukotriene B4 (isobars)/11(R)-HPETE		*	LTB4
65	Leukotriene C4	C02166	Arachidonate Metabolism	624.313	624.313	6.32419	-	45855.4	44917.4	42269.9	41959.1	35953.7	44380.8	2219.87	518.606	519.665	0	0	0	0	35683.5	41574.4	37000.8	2524.45	38086.2	0.0662826	44917.4	41959.1	0.934138	0.258912	Leukotriene C4		ns
66	Leukotriene D4	C05951	Arachidonate Metabolism	495.255	495.255	5.25365	-	29791.6	23914.7	30101.2	49099.1	38868.2	28880.1	0	317.152	0	0	1487.15	0	0	28369.9	32533.1	29696.5	1736.47	30199.8	0.0574994	29791.6	38868.2	1.30467	0.149024	Leukotriene D4		ns
67	Leukotriene E4	C05952	Arachidonate Metabolism	438.249	438.249	3.14986	-	510754	533064	504931	492549	495089	565894	0	0	0	0	0	0	0	416670	496384	507680	40503.1	473578	0.0855258	510754	495089	0.96933	0.953177	Leukotriene E4		ns
68	Leukotriene F4	C06462	Arachidonate Metabolism	567.263	567.26	4.978	-	20600.7	18945.2	21453.6	23765.5	18079.2	23078.8	0	0	0	362.777	0	0	0	14938.5	18052.2	17543.3	1363.79	16844.7	0.0809628	20600.7	23078.8	1.12029	0.536604	Leukotriene F4		ns
69	5(S)/11/12(S)/15(S)-HETE	C04805	Arachidonate Metabolism	319.228	319.228	5.49638	-	228067	246840	264429	1855889	1966955	2146567	3195.3	2183.82	1981.2	1387.57	0	558.097	295.692	893342	926325	897527	14662.1	905731	0.0161881	246840	1966955	7.96853	3.38989e-05	5(S)/11/12(S)/15(S)-HETE		****	15(S)-HETE
70	8-HETE	infllpd-21	Arachidonate Metabolism	319.228	319.228	5.7515	-	96584.9	102362	105535	3004907	2903725	4243406	2959.39	2518.81	2230.73	1958.92	0	246.368	886.574	1519654	1560557	1473768	35450.9	1517993	0.0233538	102362	3004907	29.3558	0.00159124	8-HETE		**
71	9/20-HETE	infllpd-22	Arachidonate Metabolism	319.228	319.228	5.75754	-	228067	246840	264429	3004907	2903725	4243406	3479.85	2450.98	1828.37	1958.92	1108.14	427.877	476.784	1519654	1560557	1473768	35450.9	1517993	0.0233538	246840	3004907	12.1735	0.00188904	9-HETE		**
72	12-HEPE	infllpd-28	Arachidonate Metabolism	317.212	317.212	5.55214	-	39840	43265.7	26905.6	1409757	1074040	875293	598.761	1651.08	1858.89	621.469	0	1420.29	567.284	381331	371174	364803	6806.28	372436	0.018275	39840	1074040	26.9588	0.00226342	12-HEPE		**
73	5-6-Epoxytetraene	C14815	Arachidonate Metabolism	333.207	333.207	3.51369	-	1419559	1478826	1452765	1290572	1318792	1420146	332.808	266.384	390.441	314.134	0	0	259.968	1273885	1209444	1248176	26486.4	1243835	0.0212941	1452765	1318792	0.907781	0.0668961	5-6-Epoxytetraene		ns
74	Pregnanediol	C05484	Sterols	319.264	319.264	9.55989	-	4910808	5227082	4872172	4223716	3721375	3555309	1355.74	1057.37	544.439	566.846	0	0	0	3817912	4134269	4137058	149794	4.02975e+06	0.037172	4910808	3721375	0.757793	0.0070748
75	Pregnenolone	C01953	Sterols	315.233	315.233	8.05748	-	288667	263370	299620	297650	239884	249327	0	0	320.804	0	0	0	0	225274	279110	277072	24912.1	260485	0.0956373	288667	249327	0.863719	0.359041
76	Zearalenone	LMPK04000016	Lipids	317.139	317.139	4.23522	-	151736	140490	156313	198672	174063	191145	0	0	0	0	0	0	0	130950	144190	159007	11460.1	144716	0.0791907	151736	191145	1.25972	0.0113644
77	Zanthoxyl flavone	LMPK12113265	Lipids	345.059	345.059	5.85059	-	60355.2	25966.8	82153.6	139676	57139.4	106266	0	0	0	0	0	0	0	67976.5	75994.5	81296.1	5475.31	75089	0.0729175	60355.2	106266	1.76067	0.196947
78	Vitexin 6 O-acetate	LMPK12113265	Lipids	345.059	345.059	5.85059	-	60355.2	25966.8	82153.6	139676	57139.4	106266	0	0	0	0	0	0	0	67976.5	75994.5	81296.1	5475.31	75089	0.0729175	60355.2	106266	1.76067	0.196947
79	Valerenic acid	LMPK12110279	Lipids	473.111	473.111	1.26737	-	270300	208630	277274	494575	437975	366550	0	0	0	0	0	0	0	359087	366945	423161	28533.4	383064	0.0744872	270300	437975	1.62033	0.013587
80	Undecanedioic acid	LMFA05000268	Lipids	213.185	213.185	7.08789	-	1574481	1515955	1771234	1603608	1654212	1763542	129993	122338	116000	120763	98075.8	120846	104350	1452278	1577944	1621796	71841.9	1.55067e+06	0.0463295	1574481	1654212	1.05064	0.587981
81	UDP-N-acetyl-alpha-D-glucosamine	LMFA01170007	Lipids	215.129	215.129	1.4759	-	203589	199471	249274	280384	268024	265585	8363.78	8597.62	8312.76	8289.15	5692.31	7905.15	8039.84	215395	208593	193723	9049.67	205903	0.0439511	203589	268024	1.31649	0.0315117
82	Pentadecanoic acid/Tridecyl acetate	LMSL01010002	Lipids	606.074	606.074	0.947408	-	2089112	2195887	2263560	2525876	2064833	2326454	0	0	0	521.62	327.608	2130.9	1021.02	2080848	1961365	1936710	62946	1.99297e+06	0.031584	2195887	2326454	1.05946	0.438151
83	Tridecanedioic acid	LMFA05000330	Lipids	241.217	241.217	8.57036	-	15490850	15987440	21612890	16782310	16680370	17425060	717593	571476	556098	546889	304104	552563	532699	17104820	16034180	15466360	679317	1.62018e+07	0.0419285	15987440	16782310	1.04972	0.729091
84	Tetrahydrodeoxycortisol	LMFA01170014	Lipids	243.16	243.16	1.71834	-	374037	371458	494022	434915	515620	512836	3825.94	4568.97	4279.25	3929.38	3271.72	3373.46	3687.51	274814	279973	281996	3023.81	278928	0.0108408	374037	512836	1.37108	0.197368
85	Tetradecyl acetate	LMFA05000379	Lipids	255.233	255.233	9.2598	-	493362000	503004100	575695300	496635900	476939400	470734300	25617930	23707180	23619080	22882240	11260480	20750600	20782150	509817700	476842500	463550200	1.945e+07	4.83403e+08	0.0402356	503004100	476939400	0.948182	0.191646
86	Spinochalcone C/B	LMPK12120014	Lipids	373.184	373.184	5.76813	-	840715	783484	833773	746173	718151	824331	0	0	0	0	0	0	0	718342	751309	712333	17133.4	727328	0.0235567	833773	746173	0.894936	0.19724
87	S-(4-Azidophenacyl)glutathione	C11315	Lipids	465.117	465.117	1.2099	-	1217086	1085752	1031788	1194729	1013872	1089008	0	0	0	0	0	0	0	1184939	1231671	1137352	38506.1	1184654	0.0325041	1085752	1089008	1.003	0.878932
88	Scutellarein 7-glucuronide-6-ferulate	LMPK12111104	Lipids	637.117	637.117	1.2668	-	160480	154802	176660	285557	300412	255172	0	0	0	0	0	0	0	249896	246216	214873	15714.8	236995	0.0663086	160480	285557	1.7794	0.00142583
89	Purine mononucleotide/2-Deoxyinosine 5-phosphate	C05325	Lipids	331.043	331.043	4.85967	-	3161614	2088102	2824276	3301727	2840798	3400686	305.775	0	618.338	0	0	0	0	2525836	2781655	2758744	115573	2688745	0.0429841	2824276	3301727	1.16905	0.246258
90	Quercetin 7-methyl ether 3-3-disulfate	LMPK12112627	Lipids	474.965	474.966	1.05679	-	1017584	1089278	961286	1236592	952795	1070388	0	911.089	381.583	492.808	0	0	285.434	1019454	922891	985600	40004	975982	0.0409885	1017584	1070388	1.05189	0.518249
91	Quercetin 3-7-3-4-tetra-O-sulfate	LMPK12112313	Lipids	620.859	620.859	1.15833	-	1728152	2038978	1793056	1157482	1501883	1715829	0	0	0	0	0	0	0	1744656	1753815	1672086	36560.3	1723519	0.0212126	1793056	1501883	0.837611	0.103771
92	Heptadecanoic acid/Pentadecyl acetate	LMFA05000390	Lipids	269.248	269.248	9.86654	-	16934230	18654130	22241800	19542780	18668290	18595260	670144	523850	507566	496422	347212	488782	451035	16613770	17458170	16927060	348527	1.69997e+07	0.020502	18654130	18668290	1.00076	0.840824
93	Pentadecanedioic acid	LMFA01170021	Lipids	271.192	271.192	3.35379	-	93916	100998	112957	139888	147101	142725	3793.69	4231.19	3980.37	3156.45	3025.22	3453.72	3895.35	121835	109344	122907	6156.68	118029	0.0521626	100998	142725	1.41314	0.0023926
94	Pentacosanoic acid	LMFA01010025	Lipids	381.374	381.374	12.2125	-	290942	319792	283763	330383	327336	359048	28092.1	27202	26334.3	26834.2	95914.9	35283.2	34202.7	310450	274246	271674	17704.5	285457	0.0620215	290942	330383	1.13556	0.0525685
95	Pedunculatic acid	LMPR0104070002	Lipids	349.202	349.202	3.69729	-	7393.71	8572.21	7551.88	641675	684183	577838	391.011	0	615.55	0	0	237.953	313.521	224152	252210	245895	12018	240752	0.0499183	7551.88	641675	84.9689	3.49165e-05
96	S-Adenosyl-L-homocysteine	C00021	Lipids	383.114	383.114	1.20912	-	1031394	787785	853275	993835	866341	950083	0	0	0	0	1163.52	0	0	918728	950386	1011162	38355	960092	0.0399493	853275	950083	1.11345	0.604539
97	Eurycomalactone	C08759	Lipids	347.151	347.151	4.97105	-	275865	148881	308490	154049	110231	95956.4	4315.81	4373.75	5177.42	4020.38	2694.11	4826.99	4751.83	174606	191503	188359	7337.43	184823	0.0396998	275865	110231	0.399583	0.0740639
98	Fumonisin A1	LMSP01080026	Lipids	762.391	762.391	7.23663	-	10918	10658.4	11380.8	214319	141237	136939	0	0	0	0	0	0	0	76912.8	76349.8	71270.7	2537.46	74844.4	0.0339032	10918	141237	12.9362	0.00365256
99	Nostoxanthin sulfate	LMPR01070105	Lipids	701.352	701.352	6.45256	-	8424.46	10197.9	11224.2	304999	299621	233613	0	0	0	0	0	0	0	132887	135101	129985	2095.04	132658	0.0157928	10197.9	299621	29.3805	0.000301827
100	N-Octadecanoyl-taurine	LMFA08020078	Lipids	390.268	390.268	7.56044	-	1712872	1947720	1976212	1862589	1936718	1963266	0	0	0	0	0	0	0	1630999	1717378	1614444	45130.4	1.65427e+06	0.0272811	1947720	1936718	0.994351	0.661139
101	N-Hexadecanoyl-taurine	LMFA08020080	Lipids	362.237	362.237	6.46195	-	433609	500564	509310	524104	518085	487240	0	0	0	0	0	0	0	434719	479857	467807	19083.2	460794	0.0414136	500564	518085	1.035	0.34042
102	N-(Pentadecanoyl)-ethanolamine	LMFA08040045	Lipids	284.261	284.261	8.51299	-	634535700	685751900	608634000	543363100	567542500	569598100	148928	95048.4	67948.2	60358.4	0	0	0	609438500	582645200	572235600	1.56713e+07	5.88106e+08	0.026647	634535700	567542500	0.894422	0.0266452
103	N-(9Z-octadecenoyl)-taurine	LMFA08020081	Lipids	388.252	388.252	7.4752	-	3121447	2778773	2998241	2446724	2375400	2873336	0	0	0	0	0	0	0	2801483	2704453	2906925	82682.6	2804287	0.0294844	2998241	2446724	0.816053	0.0960232
104	Glycocholate	C01921	Lipids	464.304	464.304	8.60473	-	522110	553522	549951	588944	465710	348832	0	0	0	0	0	0	0	621030	453125	490765	71939.8	521640	0.137911	549951	465710	0.846821	0.350058
105	N-(2-(4-benzenesulfonamide)-ethyl)-5Z-8Z-11Z-14Z-eicosatetraenoyl amine	LMFA08020053	Lipids	485.281	485.281	6.46076	-	126538	123051	138717	155862	166986	160374	0	0	608.391	359.591	0	322.063	0	101453	142824	137797	18431.8	127358	0.144725	126538	160374	1.2674	0.00529719
106	N-(15Z-tetracosenoyl)-1-beta-glucosyl-sphing-4-enine	LMSP0501AA08	Lipids	808.667	808.667	15.1503	-	1608834	1602824	1684409	1786868	1862727	1746562	0	0	0	0	0	0	0	1764055	1667366	1619470	60136.5	1.68363e+06	0.0357184	1608834	1786868	1.11066	0.0178877
107	Manbeta1-4Glcbeta-Cer(d18:1/24:1(15Z))	LMSP0501AD07	Lipids	970.719	970.719	14.5636	-	426037	488140	439242	501734	528835	503506	0	0	0	0	0	0	0	499665	468862	469140	14455.4	479222	0.0301644	439242	503506	1.14631	0.0444479
108	9-Dodecynoic acid	LMFA01030472	Lipids	195.138	195.138	3.80447	-	1263539	1113631	1187832	1340804	1278100	1402924	9639.02	9714.63	9184.56	8666.16	10715.9	12708	11055.9	984274	1086026	1159412	71811.8	1.07657e+06	0.0667042	1187832	1340804	1.12878	0.0538667
109	19-Oxo-9-cis-retinoic acid	LMPR01090031	Lipids	313.181	313.181	4.94306	-	212774	159830	175674	106514	108399	146800	1781.71	2314	1794.06	2627.05	1000.41	1122.23	1152.86	154914	153530	134079	9512.24	147508	0.0644864	175674	108399	0.617045	0.0383941
110	all-trans-5-6-Epoxyretinoic acid	C16680	Lipids	315.196	315.196	3.41443	-	376349	416308	383258	361726	320620	341616	0	0	0	0	0	0	0	328686	331495	330891	1207.34	330357	0.00365464	383258	341616	0.891345	0.0415663
111	L-Oleandrosyl-oleandolide	LMPK04000033	Lipids	529.305	529.305	5.92612	-	1175053	274341	673160	347422	271074	201788	4124.9	2675.04	3503.57	3565.3	0	3699.4	2649.87	436732	458064	426699	13078.8	440498	0.0296908	673160	271074	0.402688	0.175402
112	Hexadecanedioic acid	LMFA01170022	Lipids	285.207	285.207	3.95876	-	151753	175532	191530	247994	246396	239037	6204.86	7892	9178.16	8883.97	4439.73	6831.61	7504.59	190599	205539	188222	7664.7	194787	0.0393491	175532	246396	1.40371	0.00383168
113	Nonadecanoic acid	C16535	Lipids	297.28	297.28	10.9434	-	1300942	1482092	1926881	1960537	1890836	1672567	168293	168491	153738	160086	201467	165263	166916	1660383	1440615	1395506	115707	1.49883e+06	0.0771979	1482092	1890836	1.27579	0.256588
114	Nonanedioic acid	LMFA01170054	Lipids	187.097	187.097	1.48972	-	216270	181352	190748	235048	199175	216053	13995.6	12069.4	13847.8	13865.5	12245.5	14927.6	14233	164942	178661	166010	6230.8	169871	0.0366796	190748	216053	1.13267	0.233148
115	Heneicosanoic acid	LMFA01010021	Lipids	325.311	325.311	11.0054	-	588516	653506	624907	714691	885477	761766	35188.8	26027.4	22782	24238.2	62238.9	25994.7	28024.3	727663	674674	611091	47655.9	671143	0.071007	624907	761766	1.21901	0.0384308
116	Eicosanedioic acid	LMFA01170035	Lipids	341.269	341.27	8.09313	-	358567	352376	425458	410170	358298	359730	65875.2	50300	53175.9	49469.7	45378.1	52398.1	54033.1	332012	345888	345221	6389.66	341040	0.0187358	358567	359730	1.00324	0.929293
117	Dodecanol	LMFA05000001	Lipids	185.19	185.19	1.486	-	81691.4	61728.5	61302.4	138847	158998	164214	371.702	329.814	518.547	777.441	0	0	0	95325.2	104162	112237	6906.38	103908	0.0664663	61728.5	158998	2.57577	0.00111497
118	Cytochalasin B	LMPK11000002	Lipids	478.257	478.257	6.9679	-	275242	337227	350916	400804	387511	370085	0	538.987	1750.44	2599.53	0	0	0	364704	334009	360447	13578	353054	0.0384588	337227	387511	1.14911	0.0595255
119	Chola-4-6-dien-24-oic acid	LMST04010442	Lipids	355.264	355.264	8.9798	-	2288578	2189737	2078920	1481407	1310496	1337550	0	0	0	0	0	0	0	1825746	1733610	1623781	82557.3	1.72771e+06	0.0477841	2189737	1337550	0.610827	0.000550626
120	Chol-5-en-24-oic acid	LMST04010265	Lipids	357.281	357.281	9.69736	-	2247668	2254576	1986478	1499002	1262712	1304854	2903.37	2967.83	2781.06	0	6012.78	1934.92	2146.2	1472044	1642000	1598436	72078.5	1.57083e+06	0.0458857	2247668	1304854	0.580537	0.00212372
121	3-Pentadecynoic acid	LMFA01030581	Lipids	237.186	237.186	6.67589	-	57302.5	64926.4	64762.4	81584.1	62048.5	65551.7	2718.54	2185.8	2180.44	2076.89	2865.84	2080.87	1895.12	60707.9	64826.9	66472.3	2424.47	64002.3	0.0378809	64762.4	65551.7	1.01219	0.319802
122	4-Octylphenol	C14132	Lipids	205.159	205.159	7.29022	-	1306248	1414586	1417923	309786	299496	337918	171823	150761	150007	149493	66150.7	103411	113599	1028820	1258828	1212299	99293.7	1166649	0.0851102	1414586	309786	0.218994	1.01356e-05
123	(+)-15S-Hydroxy-hexadecanoic acid	LMFA01050269	Lipids	271.228	271.228	6.19279	-	1377173	1765771	2158445	4185013	3691424	3869619	70478.8	61711.7	65815.6	63521.5	24695.9	0	53538	2416656	2610493	2606244	90390.8	2.54446e+06	0.0355245	1765771	3869619	2.19146	0.00130941
124	Xanthoxin	C13453	Lipids	249.149	249.149	4.2591	-	753807	637209	740861	854869	802535	967135	8354.78	6960.82	5406.89	5835.96	7062.08	7303.23	7880.23	610295	703403	701506	43451.5	671734	0.0646855	740861	854869	1.15389	0.0544956
125	Sn-Glycero-3-phospho-1-inositol	C01225	Lipids	333.059	333.059	1.03572	-	2929996	3520126	3479733	3148584	3158210	3804801	0	0	301.621	679.498	0	0	0	3709861	3495663	3421932	122120	3.54249e+06	0.034473	3479733	3158210	0.907601	0.844081
126	(1S-2R)-3-Oxo-2-pentyl-cyclopentaneacetic acid	LMFA02020005	Lipids	211.133	211.133	4.81656	-	1072772	961392	1042492	1188351	1106719	1148512	0	0	27094.3	25051.9	35218.2	36928.7	32115.9	805158	937980	977483	73710.1	906874	0.0812793	1042492	1148512	1.1017	0.0398994
127	3-Oxo-5beta-cholanate	C03070	Lipids	373.275	373.275	5.3583	-	140680	265695	292482	277189	317511	398043	0	0	320.161	966.321	2431.61	0	0	256048	257806	292891	16968.8	268915	0.063101	265695	317511	1.19502	0.170699
128	(23R)-23-Hydroxy-3-7-dioxo-5beta-cholan-24-oic acid	LMST04010346	Lipids	403.25	403.25	5.22957	-	177720	166622	193232	211929	191990	206016	463.519	0	430.442	367.617	1385.34	359.955	440.897	148494	199281	179686	20913.5	175820	0.118948	177720	206016	1.15922	0.0681277
129	Phytyl diphosphate	C05427	Lipids	455.236	455.236	2.68157	-	382784	479071	454353	348517	410610	454882	0	0	0	0	0	0	0	375120	389295	364146	10295	376187	0.0273668	454353	410610	0.903725	0.465286
130	(3-sulfo)Galbeta-Cer(d18:0/2-OH-18:0)	LMSP06020004	Lipids	822.537	822.537	10.285	-	14516500	18050460	16379590	10171310	11248760	12807280	0	0	0	0	0	0	0	13085740	13190910	12869980	133587	1.30489e+07	0.0102374	16379590	11248760	0.686755	0.018361
131	5-Oxo-heneicosanoic acid	LMFA01060138	Lipids	339.29	339.29	7.60382	-	371282	346306	349690	535519	703550	572858	10348.5	7080.47	7208.82	7570.58	17369.2	6253.06	7033.32	362052	466356	468770	49748.1	432393	0.115053	349690	572858	1.63819	0.00854677
132	Phenyllactate	C05607	Lipids	165.055	165.055	3.29422	-	1056602	1148884	1323245	1570927	1175389	1326854	4156.3	3688.03	2898.9	2724.75	3752.14	3127.85	3072.38	1035907	1077676	1121436	34920.2	1.07834e+06	0.0323833	1148884	1326854	1.15491	0.26241
133	Pfaffic acid	C08965	Lipids	439.322	439.322	10.0315	-	320243	366362	315357	121622	133403	140949	0	0	0	0	0	0	0	254802	212502	206491	21497.8	224598	0.0957168	320243	133403	0.416568	0.000300363
134	(6R-7S)-6-7-Epoxyoctadecanoic acid	C13791	Lipids	297.243	297.243	6.48645	-	1720190	2102334	2172626	5456554	5188612	5805906	86510.5	82430	77201.7	74112.8	60204.9	0	0	3043803	3543230	3289672	203898	3292235	0.0619331	2102334	5456554	2.59547	0.00010566
135	2-Oxo-pentadecanoic acid	LMFA01060102	Lipids	255.197	255.197	4.37999	-	385893	369453	354153	472441	486732	508857	18276.3	15653.2	15240.7	14418	4263.33	15454.1	18515.4	360938	387561	379001	11097.1	375833	0.0295266	369453	486732	1.31744	0.00103558
136	2-Undecanoyl-sn-glycero-3-phosphocholine	LMGP01050071	Lipids	424.247	424.247	6.32167	-	167145	174315	170809	858687	821925	671131	0	0	0	0	0	0	0	398864	377274	391260	8941.35	389133	0.0229777	170809	821925	4.81194	0.000435621
137	24-Hydroxy-10Z-tetracosenoic acid	LMFA01050215	Lipids	381.337	381.337	8.95829	-	265411	317168	256128	421459	438335	418645	29218.1	5731.23	10053.3	7525.53	19808.4	10908.5	8800.78	294627	306885	346305	22047.6	315939	0.0697844	265411	421459	1.58795	0.00183093
138	2Z-Heptadecenoic acid	LMFA01030285	Lipids	267.233	267.233	8.84241	-	11475360	12826390	12225980	15303910	15333270	15361020	87855.6	63803.9	54293.3	56471.9	47124.9	43017	0	12229780	13330900	12825310	450030	12795330	0.0351714	12225980	15333270	1.25415	0.00128047
289	alpha-tocopheronolactone	LMPR02020063	Lipids	#N/A	#N/A	#N/A	#N/A	#N/A	#N/A	#N/A	#N/A	#N/A	#N/A	#N/A	#N/A	#N/A	#N/A	#N/A	#N/A	#N/A	#N/A
290	dihydroxy-octadecanoic acid	LMFA01050198	Lipids	#N/A	#N/A	#N/A	#N/A	#N/A	#N/A	#N/A	#N/A	#N/A	#N/A	#N/A	#N/A	#N/A	#N/A	#N/A	#N/A	#N/A	#N/A
291	hydroxy-dodecanedioic acid	LMFA01170089	Lipids	#N/A	#N/A	#N/A	#N/A	#N/A	#N/A	#N/A	#N/A	#N/A	#N/A	#N/A	#N/A	#N/A	#N/A	#N/A	#N/A	#N/A	#N/A
292	dihydroxy-hexadecanoic acid	LMFA01050340	Lipids	#N/A	#N/A	#N/A	#N/A	#N/A	#N/A	#N/A	#N/A	#N/A	#N/A	#N/A	#N/A	#N/A	#N/A	#N/A	#N/A	#N/A	#N/A
293	trihydroxy-octadecenoic acid	LMFA01050134	Lipids	#N/A	#N/A	#N/A	#N/A	#N/A	#N/A	#N/A	#N/A	#N/A	#N/A	#N/A	#N/A	#N/A	#N/A	#N/A	#N/A	#N/A	#N/A
294	tetrahydroxy-octadecanoic acid	LMFA01050105	Lipids	#N/A	#N/A	#N/A	#N/A	#N/A	#N/A	#N/A	#N/A	#N/A	#N/A	#N/A	#N/A	#N/A	#N/A	#N/A	#N/A	#N/A	#N/A
295	epoxy-octadecanoic acid	LMFA02000001	Lipids	#N/A	#N/A	#N/A	#N/A	#N/A	#N/A	#N/A	#N/A	#N/A	#N/A	#N/A	#N/A	#N/A	#N/A	#N/A	#N/A	#N/A	#N/A
296	Undecanoic acid	C17715	Lipids	#N/A	#N/A	#N/A	#N/A	#N/A	#N/A	#N/A	#N/A	#N/A	#N/A	#N/A	#N/A	#N/A	#N/A	#N/A	#N/A	#N/A	#N/A
297	Deoxycholate	C04483	Bile acids	#N/A	#N/A	#N/A	#N/A	#N/A	#N/A	#N/A	#N/A	#N/A	#N/A	#N/A	#N/A	#N/A	#N/A	#N/A	#N/A	#N/A	#N/A
298	Chenodeoxycholate	C02528	Bile acids	#N/A	#N/A	#N/A	#N/A	#N/A	#N/A	#N/A	#N/A	#N/A	#N/A	#N/A	#N/A	#N/A	#N/A	#N/A	#N/A	#N/A	#N/A
299	Ursodeoxycholate	C07880	Bile acids	#N/A	#N/A	#N/A	#N/A	#N/A	#N/A	#N/A	#N/A	#N/A	#N/A	#N/A	#N/A	#N/A	#N/A	#N/A	#N/A	#N/A	#N/A
300	Cholate	C00695	Bile acids	#N/A	#N/A	#N/A	#N/A	#N/A	#N/A	#N/A	#N/A	#N/A	#N/A	#N/A	#N/A	#N/A	#N/A	#N/A	#N/A	#N/A	#N/A
301	Glycochenodeoxycholate	C05466	Bile acids	#N/A	#N/A	#N/A	#N/A	#N/A	#N/A	#N/A	#N/A	#N/A	#N/A	#N/A	#N/A	#N/A	#N/A	#N/A	#N/A	#N/A	#N/A
302	Glycocholate	C01921	Bile acids	#N/A	#N/A	#N/A	#N/A	#N/A	#N/A	#N/A	#N/A	#N/A	#N/A	#N/A	#N/A	#N/A	#N/A	#N/A	#N/A	#N/A	#N/A
303	Taurolithocholate	C02592	Bile acids	#N/A	#N/A	#N/A	#N/A	#N/A	#N/A	#N/A	#N/A	#N/A	#N/A	#N/A	#N/A	#N/A	#N/A	#N/A	#N/A	#N/A	#N/A
304	Taurodeoxycholate	C05463	Bile acids	#N/A	#N/A	#N/A	#N/A	#N/A	#N/A	#N/A	#N/A	#N/A	#N/A	#N/A	#N/A	#N/A	#N/A	#N/A	#N/A	#N/A	#N/A
305	Taurochenodeoxycholate	C05465	Bile acids	#N/A	#N/A	#N/A	#N/A	#N/A	#N/A	#N/A	#N/A	#N/A	#N/A	#N/A	#N/A	#N/A	#N/A	#N/A	#N/A	#N/A	#N/A
306	Tauroursodeoxycholate	C16868	Bile acids	#N/A	#N/A	#N/A	#N/A	#N/A	#N/A	#N/A	#N/A	#N/A	#N/A	#N/A	#N/A	#N/A	#N/A	#N/A	#N/A	#N/A	#N/A
307	Sulfoglycolithocholate	C11301	Bile acids	#N/A	#N/A	#N/A	#N/A	#N/A	#N/A	#N/A	#N/A	#N/A	#N/A	#N/A	#N/A	#N/A	#N/A	#N/A	#N/A	#N/A	#N/A
308	Taurocholate	C05122	Bile acids	#N/A	#N/A	#N/A	#N/A	#N/A	#N/A	#N/A	#N/A	#N/A	#N/A	#N/A	#N/A	#N/A	#N/A	#N/A	#N/A	#N/A	#N/A
309	6alpha-Glucuronosylhyodeoxycholate	C11246	Bile acids	#N/A	#N/A	#N/A	#N/A	#N/A	#N/A	#N/A	#N/A	#N/A	#N/A	#N/A	#N/A	#N/A	#N/A	#N/A	#N/A	#N/A	#N/A
310	13(S)-HODE	C14762	Arachidonate metabolism	#N/A	#N/A	#N/A	#N/A	#N/A	#N/A	#N/A	#N/A	#N/A	#N/A	#N/A	#N/A	#N/A	#N/A	#N/A	#N/A	#N/A	#N/A
311	9(S)-HODE	C14767	Arachidonate metabolism	#N/A	#N/A	#N/A	#N/A	#N/A	#N/A	#N/A	#N/A	#N/A	#N/A	#N/A	#N/A	#N/A	#N/A	#N/A	#N/A	#N/A	#N/A
312	11(R)-HPETE/Leukotriene B4 (isobars)	C14820	Arachidonate metabolism	#N/A	#N/A	#N/A	#N/A	#N/A	#N/A	#N/A	#N/A	#N/A	#N/A	#N/A	#N/A	#N/A	#N/A	#N/A	#N/A	#N/A	#N/A
313	(±)12(13)-DiHOME	infllpd-01	Arachidonate metabolism	#N/A	#N/A	#N/A	#N/A	#N/A	#N/A	#N/A	#N/A	#N/A	#N/A	#N/A	#N/A	#N/A	#N/A	#N/A	#N/A	#N/A	#N/A
314	13-OxoODE	infllpd-05	Arachidonate metabolism	#N/A	#N/A	#N/A	#N/A	#N/A	#N/A	#N/A	#N/A	#N/A	#N/A	#N/A	#N/A	#N/A	#N/A	#N/A	#N/A	#N/A	#N/A
315	Prostaglandin A2	C05953	Arachidonate metabolism	#N/A	#N/A	#N/A	#N/A	#N/A	#N/A	#N/A	#N/A	#N/A	#N/A	#N/A	#N/A	#N/A	#N/A	#N/A	#N/A	#N/A	#N/A
316	Prostaglandin B2	C05954	Arachidonate metabolism	#N/A	#N/A	#N/A	#N/A	#N/A	#N/A	#N/A	#N/A	#N/A	#N/A	#N/A	#N/A	#N/A	#N/A	#N/A	#N/A	#N/A	#N/A
317	Prostaglandin D2/Thromboxane A2 (isobars)	C00696	Arachidonate metabolism	#N/A	#N/A	#N/A	#N/A	#N/A	#N/A	#N/A	#N/A	#N/A	#N/A	#N/A	#N/A	#N/A	#N/A	#N/A	#N/A	#N/A	#N/A
318	Prostaglandin E2	C00584	Arachidonate metabolism	#N/A	#N/A	#N/A	#N/A	#N/A	#N/A	#N/A	#N/A	#N/A	#N/A	#N/A	#N/A	#N/A	#N/A	#N/A	#N/A	#N/A	#N/A
319	Prostaglandin F2alpha/beta/D1 (isobars)	C00639	Arachidonate metabolism	#N/A	#N/A	#N/A	#N/A	#N/A	#N/A	#N/A	#N/A	#N/A	#N/A	#N/A	#N/A	#N/A	#N/A	#N/A	#N/A	#N/A	#N/A
320	Prostaglandin D3 (isobars)	C13802	Arachidonate metabolism	#N/A	#N/A	#N/A	#N/A	#N/A	#N/A	#N/A	#N/A	#N/A	#N/A	#N/A	#N/A	#N/A	#N/A	#N/A	#N/A	#N/A	#N/A
321	Prostaglandin G2	C05956	Arachidonate metabolism	#N/A	#N/A	#N/A	#N/A	#N/A	#N/A	#N/A	#N/A	#N/A	#N/A	#N/A	#N/A	#N/A	#N/A	#N/A	#N/A	#N/A	#N/A
322	2-3-Dinor-8-iso prostaglandin F2alpha	C14794	Arachidonate metabolism	#N/A	#N/A	#N/A	#N/A	#N/A	#N/A	#N/A	#N/A	#N/A	#N/A	#N/A	#N/A	#N/A	#N/A	#N/A	#N/A	#N/A	#N/A
323	Thromboxane B2	C05963	Arachidonate metabolism	#N/A	#N/A	#N/A	#N/A	#N/A	#N/A	#N/A	#N/A	#N/A	#N/A	#N/A	#N/A	#N/A	#N/A	#N/A	#N/A	#N/A	#N/A
324	Leukotriene A4	C00909	Arachidonate metabolism	#N/A	#N/A	#N/A	#N/A	#N/A	#N/A	#N/A	#N/A	#N/A	#N/A	#N/A	#N/A	#N/A	#N/A	#N/A	#N/A	#N/A	#N/A
325	Leukotriene C4	C02166	Arachidonate metabolism	#N/A	#N/A	#N/A	#N/A	#N/A	#N/A	#N/A	#N/A	#N/A	#N/A	#N/A	#N/A	#N/A	#N/A	#N/A	#N/A	#N/A	#N/A
326	5alpha-Cholest-7-en-3beta-ol	C01189	Sterols	#N/A	#N/A	#N/A	#N/A	#N/A	#N/A	#N/A	#N/A	#N/A	#N/A	#N/A	#N/A	#N/A	#N/A	#N/A	#N/A	#N/A	#N/A
327	Cholesterol sulfate	C18043	Sterols	#N/A	#N/A	#N/A	#N/A	#N/A	#N/A	#N/A	#N/A	#N/A	#N/A	#N/A	#N/A	#N/A	#N/A	#N/A	#N/A	#N/A	#N/A
328	Hydroxycholesterol	C03594	Sterols	#N/A	#N/A	#N/A	#N/A	#N/A	#N/A	#N/A	#N/A	#N/A	#N/A	#N/A	#N/A	#N/A	#N/A	#N/A	#N/A	#N/A	#N/A
329	Epiandrosterone	C07635	Sterols	#N/A	#N/A	#N/A	#N/A	#N/A	#N/A	#N/A	#N/A	#N/A	#N/A	#N/A	#N/A	#N/A	#N/A	#N/A	#N/A	#N/A	#N/A
330	Androsterone	C00523	Sterols	#N/A	#N/A	#N/A	#N/A	#N/A	#N/A	#N/A	#N/A	#N/A	#N/A	#N/A	#N/A	#N/A	#N/A	#N/A	#N/A	#N/A	#N/A
331	Cortisol	C00735	Sterols	#N/A	#N/A	#N/A	#N/A	#N/A	#N/A	#N/A	#N/A	#N/A	#N/A	#N/A	#N/A	#N/A	#N/A	#N/A	#N/A	#N/A	#N/A
332	Cortisone	C00762	Sterols	#N/A	#N/A	#N/A	#N/A	#N/A	#N/A	#N/A	#N/A	#N/A	#N/A	#N/A	#N/A	#N/A	#N/A	#N/A	#N/A	#N/A	#N/A
333	7alpha-Hydroxy-3-oxo-4-cholestenoate	C17337	Sterols	#N/A	#N/A	#N/A	#N/A	#N/A	#N/A	#N/A	#N/A	#N/A	#N/A	#N/A	#N/A	#N/A	#N/A	#N/A	#N/A	#N/A	#N/A
334	11beta-17beta-Dihydroxy-4-androsten-3-one	C18075	Sterols	#N/A	#N/A	#N/A	#N/A	#N/A	#N/A	#N/A	#N/A	#N/A	#N/A	#N/A	#N/A	#N/A	#N/A	#N/A	#N/A	#N/A	#N/A
335	Pregna-4-11-diene-3-20-dione	C14646	Sterols	#N/A	#N/A	#N/A	#N/A	#N/A	#N/A	#N/A	#N/A	#N/A	#N/A	#N/A	#N/A	#N/A	#N/A	#N/A	#N/A	#N/A	#N/A
336	Pregna-4-9(11)-diene-3-20-dione	C04084	Sterols	#N/A	#N/A	#N/A	#N/A	#N/A	#N/A	#N/A	#N/A	#N/A	#N/A	#N/A	#N/A	#N/A	#N/A	#N/A	#N/A	#N/A	#N/A
337	Pregnanediol	C05484	Sterols	#N/A	#N/A	#N/A	#N/A	#N/A	#N/A	#N/A	#N/A	#N/A	#N/A	#N/A	#N/A	#N/A	#N/A	#N/A	#N/A	#N/A	#N/A
338	3beta-Hydroxypregn-5-en-20-one sulfate	C18044	Sterols	#N/A	#N/A	#N/A	#N/A	#N/A	#N/A	#N/A	#N/A	#N/A	#N/A	#N/A	#N/A	#N/A	#N/A	#N/A	#N/A	#N/A	#N/A
339	21-Hydroxypregnenolone	C05485	Sterols	#N/A	#N/A	#N/A	#N/A	#N/A	#N/A	#N/A	#N/A	#N/A	#N/A	#N/A	#N/A	#N/A	#N/A	#N/A	#N/A	#N/A	#N/A
340	Pregnenolone	C01953	Sterols	#N/A	#N/A	#N/A	#N/A	#N/A	#N/A	#N/A	#N/A	#N/A	#N/A	#N/A	#N/A	#N/A	#N/A	#N/A	#N/A	#N/A	#N/A
341	Pregnenolone carbonitrile	C15637	Sterols	#N/A	#N/A	#N/A	#N/A	#N/A	#N/A	#N/A	#N/A	#N/A	#N/A	#N/A	#N/A	#N/A	#N/A	#N/A	#N/A	#N/A	#N/A
342	Mesterolone	LMST02020107	Sterols	#N/A	#N/A	#N/A	#N/A	#N/A	#N/A	#N/A	#N/A	#N/A	#N/A	#N/A	#N/A	#N/A	#N/A	#N/A	#N/A	#N/A	#N/A
343	Lumisterol 3	LMST01010247	Sterols	#N/A	#N/A	#N/A	#N/A	#N/A	#N/A	#N/A	#N/A	#N/A	#N/A	#N/A	#N/A	#N/A	#N/A	#N/A	#N/A	#N/A	#N/A
344	Delta 8_14 -Sterol	LMST01031020	Sterols	#N/A	#N/A	#N/A	#N/A	#N/A	#N/A	#N/A	#N/A	#N/A	#N/A	#N/A	#N/A	#N/A	#N/A	#N/A	#N/A	#N/A	#N/A
345	Cholesterol glucuronide	LMST05010043	Sterols	#N/A	#N/A	#N/A	#N/A	#N/A	#N/A	#N/A	#N/A	#N/A	#N/A	#N/A	#N/A	#N/A	#N/A	#N/A	#N/A	#N/A	#N/A
346	sn-caldito-1-phosphoethanolamine	LMGP19000001	Ethanolamines	#N/A	#N/A	#N/A	#N/A	#N/A	#N/A	#N/A	#N/A	#N/A	#N/A	#N/A	#N/A	#N/A	#N/A	#N/A	#N/A	#N/A	#N/A
347	sn-caldarchaeo-1-phosphoethanolamine	LMGP18000001	Ethanolamines	#N/A	#N/A	#N/A	#N/A	#N/A	#N/A	#N/A	#N/A	#N/A	#N/A	#N/A	#N/A	#N/A	#N/A	#N/A	#N/A	#N/A	#N/A
348	N-hexadecanoyl-ethanolamine	LMFA08040013	Ethanolamines	#N/A	#N/A	#N/A	#N/A	#N/A	#N/A	#N/A	#N/A	#N/A	#N/A	#N/A	#N/A	#N/A	#N/A	#N/A	#N/A	#N/A	#N/A
349	N-eicosanoyl-ethanolamine	LMFA08040038	Ethanolamines	#N/A	#N/A	#N/A	#N/A	#N/A	#N/A	#N/A	#N/A	#N/A	#N/A	#N/A	#N/A	#N/A	#N/A	#N/A	#N/A	#N/A	#N/A
350	N-([8S_12R]9S_11R_15S-trihydroxy-5Z_13E-prostadienoyl)-ethanolamine	LMFA03110015	Ethanolamines	#N/A	#N/A	#N/A	#N/A	#N/A	#N/A	#N/A	#N/A	#N/A	#N/A	#N/A	#N/A	#N/A	#N/A	#N/A	#N/A	#N/A	#N/A
351	N-(Tricosanoyl)-ethanolamine	LMFA08040053	Ethanolamines	#N/A	#N/A	#N/A	#N/A	#N/A	#N/A	#N/A	#N/A	#N/A	#N/A	#N/A	#N/A	#N/A	#N/A	#N/A	#N/A	#N/A	#N/A
352	N-(Tetradecanoyl)-ethanolamine	LMFA08040042	Ethanolamines	#N/A	#N/A	#N/A	#N/A	#N/A	#N/A	#N/A	#N/A	#N/A	#N/A	#N/A	#N/A	#N/A	#N/A	#N/A	#N/A	#N/A	#N/A
353	N-(Tetracosanoyl)-ethanolamine	LMFA08040054	Ethanolamines	#N/A	#N/A	#N/A	#N/A	#N/A	#N/A	#N/A	#N/A	#N/A	#N/A	#N/A	#N/A	#N/A	#N/A	#N/A	#N/A	#N/A	#N/A
354	N-(Pentadecanoyl)-ethanolamine	LMFA08040045	Ethanolamines	#N/A	#N/A	#N/A	#N/A	#N/A	#N/A	#N/A	#N/A	#N/A	#N/A	#N/A	#N/A	#N/A	#N/A	#N/A	#N/A	#N/A	#N/A
355	N-(octadecanoyl)-tetradecasphing-4-enine-1-phosphoethanolamine	LMSP03020001	Ethanolamines	#N/A	#N/A	#N/A	#N/A	#N/A	#N/A	#N/A	#N/A	#N/A	#N/A	#N/A	#N/A	#N/A	#N/A	#N/A	#N/A	#N/A	#N/A
356	N-(Octadecanoyl)-ethanolamine	LMFA08040051	Ethanolamines	#N/A	#N/A	#N/A	#N/A	#N/A	#N/A	#N/A	#N/A	#N/A	#N/A	#N/A	#N/A	#N/A	#N/A	#N/A	#N/A	#N/A	#N/A
357	N-(Hexadecanoyl)-ethanolamine	LMFA08040013	Ethanolamines	#N/A	#N/A	#N/A	#N/A	#N/A	#N/A	#N/A	#N/A	#N/A	#N/A	#N/A	#N/A	#N/A	#N/A	#N/A	#N/A	#N/A	#N/A
358	N-(Heptadecanoyl)-ethanolamine	LMFA08040049	Ethanolamines	#N/A	#N/A	#N/A	#N/A	#N/A	#N/A	#N/A	#N/A	#N/A	#N/A	#N/A	#N/A	#N/A	#N/A	#N/A	#N/A	#N/A	#N/A
359	N-(Dodecanoyl)-ethanolamine	LMFA08040041	Ethanolamines	#N/A	#N/A	#N/A	#N/A	#N/A	#N/A	#N/A	#N/A	#N/A	#N/A	#N/A	#N/A	#N/A	#N/A	#N/A	#N/A	#N/A	#N/A
360	N-(acyl)-sphing-4-enine-1-phosphoethanolamine	LMSP03020000	Ethanolamines	#N/A	#N/A	#N/A	#N/A	#N/A	#N/A	#N/A	#N/A	#N/A	#N/A	#N/A	#N/A	#N/A	#N/A	#N/A	#N/A	#N/A	#N/A
361	N-(9Z_12Z_15Z-octadecatrienoyl)-ethanolamine	LMFA08040007	Ethanolamines	#N/A	#N/A	#N/A	#N/A	#N/A	#N/A	#N/A	#N/A	#N/A	#N/A	#N/A	#N/A	#N/A	#N/A	#N/A	#N/A	#N/A	#N/A
362	N-(9Z_12Z-octadecadienoyl)-ethanolamine	LMFA08040004	Ethanolamines	#N/A	#N/A	#N/A	#N/A	#N/A	#N/A	#N/A	#N/A	#N/A	#N/A	#N/A	#N/A	#N/A	#N/A	#N/A	#N/A	#N/A	#N/A
363	N-(9Z-octadecenoyl)-ethanolamine	LMFA08040015	Ethanolamines	#N/A	#N/A	#N/A	#N/A	#N/A	#N/A	#N/A	#N/A	#N/A	#N/A	#N/A	#N/A	#N/A	#N/A	#N/A	#N/A	#N/A	#N/A
364	N-(9Z-hexadecenoyl)-ethanolamine	LMFA08040043	Ethanolamines	#N/A	#N/A	#N/A	#N/A	#N/A	#N/A	#N/A	#N/A	#N/A	#N/A	#N/A	#N/A	#N/A	#N/A	#N/A	#N/A	#N/A	#N/A
365	N-(9S_15S-dihydroxy-11-oxo-5Z_13E-prostadienoyl)-ethanolamine	LMFA03010152	Ethanolamines	#N/A	#N/A	#N/A	#N/A	#N/A	#N/A	#N/A	#N/A	#N/A	#N/A	#N/A	#N/A	#N/A	#N/A	#N/A	#N/A	#N/A	#N/A
366	N-(8Z_11Z_14Z-eicosatrienoyl)-ethanolamine	LMFA08040011	Ethanolamines	#N/A	#N/A	#N/A	#N/A	#N/A	#N/A	#N/A	#N/A	#N/A	#N/A	#N/A	#N/A	#N/A	#N/A	#N/A	#N/A	#N/A	#N/A
367	N-(7Z_10Z_13Z_16Z-docosatetraenoyl)-ethanolamine	LMFA08040028	Ethanolamines	#N/A	#N/A	#N/A	#N/A	#N/A	#N/A	#N/A	#N/A	#N/A	#N/A	#N/A	#N/A	#N/A	#N/A	#N/A	#N/A	#N/A	#N/A
368	N-(6Z_9Z_12Z_15Z-octadecatetraenoyl)-ethanolamine	LMFA08040006	Ethanolamines	#N/A	#N/A	#N/A	#N/A	#N/A	#N/A	#N/A	#N/A	#N/A	#N/A	#N/A	#N/A	#N/A	#N/A	#N/A	#N/A	#N/A	#N/A
369	N-(5Z_8Z_11Z_14Z_17Z-eicosapentaenoyl)-ethanolamine	LMFA08040008	Ethanolamines	#N/A	#N/A	#N/A	#N/A	#N/A	#N/A	#N/A	#N/A	#N/A	#N/A	#N/A	#N/A	#N/A	#N/A	#N/A	#N/A	#N/A	#N/A
370	N-(5Z_8Z_11Z_14Z-heneicosatetraenoyl)-ethanolamine	LMFA08040020	Ethanolamines	#N/A	#N/A	#N/A	#N/A	#N/A	#N/A	#N/A	#N/A	#N/A	#N/A	#N/A	#N/A	#N/A	#N/A	#N/A	#N/A	#N/A	#N/A
371	N-(5Z_8Z_11Z_14Z-eicosatetraenoyl)-ethanolamine(d8)	LMFA08040044	Ethanolamines	#N/A	#N/A	#N/A	#N/A	#N/A	#N/A	#N/A	#N/A	#N/A	#N/A	#N/A	#N/A	#N/A	#N/A	#N/A	#N/A	#N/A	#N/A
372	N-(5Z_8Z_11Z_14Z-docosatetraenoyl)-ethanolamine	LMFA08040021	Ethanolamines	#N/A	#N/A	#N/A	#N/A	#N/A	#N/A	#N/A	#N/A	#N/A	#N/A	#N/A	#N/A	#N/A	#N/A	#N/A	#N/A	#N/A	#N/A
373	N-(5Z_8Z_11Z-eicosatrienoyl)-ethanolamine	LMFA08040037	Ethanolamines	#N/A	#N/A	#N/A	#N/A	#N/A	#N/A	#N/A	#N/A	#N/A	#N/A	#N/A	#N/A	#N/A	#N/A	#N/A	#N/A	#N/A	#N/A
374	N-(4Z_7Z_10Z_13Z_16Z_19Z-docosahexaenoyl)-ethanolamine	LMFA08040009	Ethanolamines	#N/A	#N/A	#N/A	#N/A	#N/A	#N/A	#N/A	#N/A	#N/A	#N/A	#N/A	#N/A	#N/A	#N/A	#N/A	#N/A	#N/A	#N/A
375	N-(2_2-dimethy-5Z_8Z_11Z_14Z-eicosatetraenoyl)-ethanolamine	LMFA08040017	Ethanolamines	#N/A	#N/A	#N/A	#N/A	#N/A	#N/A	#N/A	#N/A	#N/A	#N/A	#N/A	#N/A	#N/A	#N/A	#N/A	#N/A	#N/A	#N/A
376	N-(13Z-docosanoyl)-ethanolamine	LMFA08040050	Ethanolamines	#N/A	#N/A	#N/A	#N/A	#N/A	#N/A	#N/A	#N/A	#N/A	#N/A	#N/A	#N/A	#N/A	#N/A	#N/A	#N/A	#N/A	#N/A
377	N-(11Z_14Z-eicosadienoyl)-ethanolamine	LMFA08040002	Ethanolamines	#N/A	#N/A	#N/A	#N/A	#N/A	#N/A	#N/A	#N/A	#N/A	#N/A	#N/A	#N/A	#N/A	#N/A	#N/A	#N/A	#N/A	#N/A
378	N-(11Z-eicosaenoyl)-ethanolamine	LMFA08040010	Ethanolamines	#N/A	#N/A	#N/A	#N/A	#N/A	#N/A	#N/A	#N/A	#N/A	#N/A	#N/A	#N/A	#N/A	#N/A	#N/A	#N/A	#N/A	#N/A
379	2-octadecanoyl-3-(5Z_8Z-eicosadienoyl)-sn-glycero-1-phosphoethanolamine	LMGP02010120	Phospohethanolamines	#N/A	#N/A	#N/A	#N/A	#N/A	#N/A	#N/A	#N/A	#N/A	#N/A	#N/A	#N/A	#N/A	#N/A	#N/A	#N/A	#N/A	#N/A
380	2-acyl-sn-glycero-3-phosphoethanolamine	LMGP0205AA00	Phospohethanolamines	#N/A	#N/A	#N/A	#N/A	#N/A	#N/A	#N/A	#N/A	#N/A	#N/A	#N/A	#N/A	#N/A	#N/A	#N/A	#N/A	#N/A	#N/A
381	2-(5Z_8Z_11Z_14Z-eicosatetraenoyl)-3-octadecanoyl-sn-glycero-1-phosphoethanolamine	LMGP02010119	Phospohethanolamines	#N/A	#N/A	#N/A	#N/A	#N/A	#N/A	#N/A	#N/A	#N/A	#N/A	#N/A	#N/A	#N/A	#N/A	#N/A	#N/A	#N/A	#N/A
382	2-(5Z_8Z_11Z_14Z-eicosatetraenoyl)-3-hexadecanoyl-sn-glycero-1-phospho-N_N-dimethylethanolamine	LMGP02010321	Phospohethanolamines	#N/A	#N/A	#N/A	#N/A	#N/A	#N/A	#N/A	#N/A	#N/A	#N/A	#N/A	#N/A	#N/A	#N/A	#N/A	#N/A	#N/A	#N/A
383	1_2-diundecanoyl-sn-glycero-3-phosphoethanolamine	LMGP02010014	Phospohethanolamines	#N/A	#N/A	#N/A	#N/A	#N/A	#N/A	#N/A	#N/A	#N/A	#N/A	#N/A	#N/A	#N/A	#N/A	#N/A	#N/A	#N/A	#N/A
384	1_2-ditricosanoyl-sn-glycero-3-phosphoethanolamine	LMGP02010195	Phospohethanolamines	#N/A	#N/A	#N/A	#N/A	#N/A	#N/A	#N/A	#N/A	#N/A	#N/A	#N/A	#N/A	#N/A	#N/A	#N/A	#N/A	#N/A	#N/A
385	1_2-ditetradecanoyl-sn-glycero-3-phospho-N-methylethanolamine	LMGP02010343	Phospohethanolamines	#N/A	#N/A	#N/A	#N/A	#N/A	#N/A	#N/A	#N/A	#N/A	#N/A	#N/A	#N/A	#N/A	#N/A	#N/A	#N/A	#N/A	#N/A
386	1_2-dipentacosanoyl-sn-glycero-3-phosphoethanolamine	LMGP02010088	Phospohethanolamines	#N/A	#N/A	#N/A	#N/A	#N/A	#N/A	#N/A	#N/A	#N/A	#N/A	#N/A	#N/A	#N/A	#N/A	#N/A	#N/A	#N/A	#N/A
387	1_2-dioctadecyl-sn-glycero-3-phosphoethanolamine	LMGP02040005	Phospohethanolamines	#N/A	#N/A	#N/A	#N/A	#N/A	#N/A	#N/A	#N/A	#N/A	#N/A	#N/A	#N/A	#N/A	#N/A	#N/A	#N/A	#N/A	#N/A
388	1_2-dioctadecanoyl-sn-glycero-3-phosphoethanolamine	LMGP02010097	Phospohethanolamines	#N/A	#N/A	#N/A	#N/A	#N/A	#N/A	#N/A	#N/A	#N/A	#N/A	#N/A	#N/A	#N/A	#N/A	#N/A	#N/A	#N/A	#N/A
389	1_2-dioctadecanoyl-sn-glycero-3-phospho-N_N-dimethylethanolamine	LMGP02010317	Phospohethanolamines	#N/A	#N/A	#N/A	#N/A	#N/A	#N/A	#N/A	#N/A	#N/A	#N/A	#N/A	#N/A	#N/A	#N/A	#N/A	#N/A	#N/A	#N/A
390	1_2-dioctadecanoyl-sn-glycero-3-phospho-N-methylethanolamine	LMGP02010344	Phospohethanolamines	#N/A	#N/A	#N/A	#N/A	#N/A	#N/A	#N/A	#N/A	#N/A	#N/A	#N/A	#N/A	#N/A	#N/A	#N/A	#N/A	#N/A	#N/A
391	1_2-dihexadecanoyl-sn-glycero-3-phospho-N_N-dimethylethanolamine	LMGP02010325	Phospohethanolamines	#N/A	#N/A	#N/A	#N/A	#N/A	#N/A	#N/A	#N/A	#N/A	#N/A	#N/A	#N/A	#N/A	#N/A	#N/A	#N/A	#N/A	#N/A
392	1_2-dihexacosanoyl-sn-glycero-3-phosphoethanolamine	LMGP02010090	Phospohethanolamines	#N/A	#N/A	#N/A	#N/A	#N/A	#N/A	#N/A	#N/A	#N/A	#N/A	#N/A	#N/A	#N/A	#N/A	#N/A	#N/A	#N/A	#N/A
393	1_2-diheneicosanoyl-sn-glycero-3-phosphoethanolamine	LMGP02010150	Phospohethanolamines	#N/A	#N/A	#N/A	#N/A	#N/A	#N/A	#N/A	#N/A	#N/A	#N/A	#N/A	#N/A	#N/A	#N/A	#N/A	#N/A	#N/A	#N/A
394	1-octadecyl-sn-glycero-3-phosphoethanolamine	LMGP02060003	Phospohethanolamines	#N/A	#N/A	#N/A	#N/A	#N/A	#N/A	#N/A	#N/A	#N/A	#N/A	#N/A	#N/A	#N/A	#N/A	#N/A	#N/A	#N/A	#N/A
395	1-octadecanoyl-sn-glycero-3-phosphoethanolamine	LMGP02050001	Phospohethanolamines	#N/A	#N/A	#N/A	#N/A	#N/A	#N/A	#N/A	#N/A	#N/A	#N/A	#N/A	#N/A	#N/A	#N/A	#N/A	#N/A	#N/A	#N/A
396	1-nonanoyl-2-tridecanoyl-sn-glycero-3-phosphoethanolamine	LMGP02010282	Phospohethanolamines	#N/A	#N/A	#N/A	#N/A	#N/A	#N/A	#N/A	#N/A	#N/A	#N/A	#N/A	#N/A	#N/A	#N/A	#N/A	#N/A	#N/A	#N/A
397	1-hexadecyl-sn-glycero-3-phosphoethanolamine	LMGP02060002	Phospohethanolamines	#N/A	#N/A	#N/A	#N/A	#N/A	#N/A	#N/A	#N/A	#N/A	#N/A	#N/A	#N/A	#N/A	#N/A	#N/A	#N/A	#N/A	#N/A
398	1-hexadecanoyl-sn-glycero-3-phosphoethanolamine	LMGP02050002	Phospohethanolamines	#N/A	#N/A	#N/A	#N/A	#N/A	#N/A	#N/A	#N/A	#N/A	#N/A	#N/A	#N/A	#N/A	#N/A	#N/A	#N/A	#N/A	#N/A
399	1-hexadecanoyl-2-tridecanoyl-sn-glycero-3-phosphoethanolamine	LMGP02010298	Phospohethanolamines	#N/A	#N/A	#N/A	#N/A	#N/A	#N/A	#N/A	#N/A	#N/A	#N/A	#N/A	#N/A	#N/A	#N/A	#N/A	#N/A	#N/A	#N/A
400	1-dodecanoyl-2-pentadecanoyl-sn-glycero-3-phosphoethanolamine	LMGP02010223	Phospohethanolamines	#N/A	#N/A	#N/A	#N/A	#N/A	#N/A	#N/A	#N/A	#N/A	#N/A	#N/A	#N/A	#N/A	#N/A	#N/A	#N/A	#N/A	#N/A
401	1-docosanoyl-2-heptadecanoyl-sn-glycero-3-phosphoethanolamine	LMGP02010214	Phospohethanolamines	#N/A	#N/A	#N/A	#N/A	#N/A	#N/A	#N/A	#N/A	#N/A	#N/A	#N/A	#N/A	#N/A	#N/A	#N/A	#N/A	#N/A	#N/A
402	1-docosanoyl-2-heneicosanoyl-sn-glycero-3-phosphoethanolamine	LMGP02010218	Phospohethanolamines	#N/A	#N/A	#N/A	#N/A	#N/A	#N/A	#N/A	#N/A	#N/A	#N/A	#N/A	#N/A	#N/A	#N/A	#N/A	#N/A	#N/A	#N/A
403	1-(9Z-octadecenyl)-sn-glycero-3-phosphoethanolamine	LMGP02060004	Phospohethanolamines	#N/A	#N/A	#N/A	#N/A	#N/A	#N/A	#N/A	#N/A	#N/A	#N/A	#N/A	#N/A	#N/A	#N/A	#N/A	#N/A	#N/A	#N/A
404	1-(9Z-octadecenoyl)-sn-glycero-3-phosphoethanolamine	LMGP02050004	Phospohethanolamines	#N/A	#N/A	#N/A	#N/A	#N/A	#N/A	#N/A	#N/A	#N/A	#N/A	#N/A	#N/A	#N/A	#N/A	#N/A	#N/A	#N/A	#N/A
405	1-(9Z-heptadecenoyl)-sn-glycero-3-phosphoethanolamine	LMGP02050008	Phospohethanolamines	#N/A	#N/A	#N/A	#N/A	#N/A	#N/A	#N/A	#N/A	#N/A	#N/A	#N/A	#N/A	#N/A	#N/A	#N/A	#N/A	#N/A	#N/A
406	1-(5Z_8Z_11Z_14Z-eicosatetraenoyl)-sn-glycero-3-phosphoethanolamine	LMGP02050009	Phospohethanolamines	#N/A	#N/A	#N/A	#N/A	#N/A	#N/A	#N/A	#N/A	#N/A	#N/A	#N/A	#N/A	#N/A	#N/A	#N/A	#N/A	#N/A	#N/A
407	1-(5Z_8Z-eicosadienoyl)-2-octadecanoyl-sn-glycero-3-phosphoethanolamine	LMGP02010121	Phospohethanolamines	#N/A	#N/A	#N/A	#N/A	#N/A	#N/A	#N/A	#N/A	#N/A	#N/A	#N/A	#N/A	#N/A	#N/A	#N/A	#N/A	#N/A	#N/A
408	1-(1Z_12Z-nonadecadienyl)-sn-glycero-3-phosphoethanolamine	LMGP02070003	Phospohethanolamines	#N/A	#N/A	#N/A	#N/A	#N/A	#N/A	#N/A	#N/A	#N/A	#N/A	#N/A	#N/A	#N/A	#N/A	#N/A	#N/A	#N/A	#N/A
409	1-(1Z-hexadecenyl)-sn-glycero-3-phosphoethanolamine	LMGP02070001	Phospohethanolamines	#N/A	#N/A	#N/A	#N/A	#N/A	#N/A	#N/A	#N/A	#N/A	#N/A	#N/A	#N/A	#N/A	#N/A	#N/A	#N/A	#N/A	#N/A
410	N-(hexacosanoyl)-sphinganine-1-phosphocholine	LMSP03010026	Phosphocholines	#N/A	#N/A	#N/A	#N/A	#N/A	#N/A	#N/A	#N/A	#N/A	#N/A	#N/A	#N/A	#N/A	#N/A	#N/A	#N/A	#N/A	#N/A
411	N-(docosanoyl)-sphing-4-enine-1-phosphocholine	LMSP03010006	Phosphocholines	#N/A	#N/A	#N/A	#N/A	#N/A	#N/A	#N/A	#N/A	#N/A	#N/A	#N/A	#N/A	#N/A	#N/A	#N/A	#N/A	#N/A	#N/A
412	N-(15Z-tetracosenoyl)-sphing-4-enine-1-phosphocholine	LMSP03010007	Phosphocholines	#N/A	#N/A	#N/A	#N/A	#N/A	#N/A	#N/A	#N/A	#N/A	#N/A	#N/A	#N/A	#N/A	#N/A	#N/A	#N/A	#N/A	#N/A
413	3-pentadecanoyl-sn-glycero-1-phosphocholine	LMGP01050017	Phosphocholines	#N/A	#N/A	#N/A	#N/A	#N/A	#N/A	#N/A	#N/A	#N/A	#N/A	#N/A	#N/A	#N/A	#N/A	#N/A	#N/A	#N/A	#N/A
414	3-octadecyl-sn-glycero-1-phosphocholine	LMGP01060015	Phosphocholines	#N/A	#N/A	#N/A	#N/A	#N/A	#N/A	#N/A	#N/A	#N/A	#N/A	#N/A	#N/A	#N/A	#N/A	#N/A	#N/A	#N/A	#N/A
415	3-hexadecanoyl-sn-glycero-1-phosphocholine	LMGP01050019	Phosphocholines	#N/A	#N/A	#N/A	#N/A	#N/A	#N/A	#N/A	#N/A	#N/A	#N/A	#N/A	#N/A	#N/A	#N/A	#N/A	#N/A	#N/A	#N/A
416	2_3-di-(9Z-octadecenoyl)-sn-glycero-1-phosphocholine	LMGP01010891	Phosphocholines	#N/A	#N/A	#N/A	#N/A	#N/A	#N/A	#N/A	#N/A	#N/A	#N/A	#N/A	#N/A	#N/A	#N/A	#N/A	#N/A	#N/A	#N/A
417	2-valeryl-sn-glycero-3-phosphocholine	LMGP01050091	Phosphocholines	#N/A	#N/A	#N/A	#N/A	#N/A	#N/A	#N/A	#N/A	#N/A	#N/A	#N/A	#N/A	#N/A	#N/A	#N/A	#N/A	#N/A	#N/A
418	2-tetradecanoyl-sn-glycero-3-phosphocholine	LMGP01050073	Phosphocholines	#N/A	#N/A	#N/A	#N/A	#N/A	#N/A	#N/A	#N/A	#N/A	#N/A	#N/A	#N/A	#N/A	#N/A	#N/A	#N/A	#N/A	#N/A
419	2-propionyl-sn-glycero-3-phosphocholine	LMGP01050087	Phosphocholines	#N/A	#N/A	#N/A	#N/A	#N/A	#N/A	#N/A	#N/A	#N/A	#N/A	#N/A	#N/A	#N/A	#N/A	#N/A	#N/A	#N/A	#N/A
420	2-octadecyl-3-acetyl-sn-glycero-1-phosphocholine	LMGP01080017	Phosphocholines	#N/A	#N/A	#N/A	#N/A	#N/A	#N/A	#N/A	#N/A	#N/A	#N/A	#N/A	#N/A	#N/A	#N/A	#N/A	#N/A	#N/A	#N/A
421	2-methyl-3-tetradecyl-sn-glycero-1-phosphocholine	LMGP01040022	Phosphocholines	#N/A	#N/A	#N/A	#N/A	#N/A	#N/A	#N/A	#N/A	#N/A	#N/A	#N/A	#N/A	#N/A	#N/A	#N/A	#N/A	#N/A	#N/A
422	2-acetyl-sn-glycero-3-phosphocholine	LMGP01050085	Phosphocholines	#N/A	#N/A	#N/A	#N/A	#N/A	#N/A	#N/A	#N/A	#N/A	#N/A	#N/A	#N/A	#N/A	#N/A	#N/A	#N/A	#N/A	#N/A
423	2-acetyl-3-heptadecanoyl-sn-glycero-1-phosphocholine	LMGP01010715	Phosphocholines	#N/A	#N/A	#N/A	#N/A	#N/A	#N/A	#N/A	#N/A	#N/A	#N/A	#N/A	#N/A	#N/A	#N/A	#N/A	#N/A	#N/A	#N/A
424	2-acetyl-3-(9Z-octadecenyl)-sn-glycero-1-phosphocholine	LMGP01020155	Phosphocholines	#N/A	#N/A	#N/A	#N/A	#N/A	#N/A	#N/A	#N/A	#N/A	#N/A	#N/A	#N/A	#N/A	#N/A	#N/A	#N/A	#N/A	#N/A
425	2-(9Z-octadecenoyl)-sn-glycero-3-phosphocholine	LMGP01050083	Phosphocholines	#N/A	#N/A	#N/A	#N/A	#N/A	#N/A	#N/A	#N/A	#N/A	#N/A	#N/A	#N/A	#N/A	#N/A	#N/A	#N/A	#N/A	#N/A
426	2-(8-[3]-ladderane-octanyl)-sn-glycero-3-phosphocholine	LMGP01060026	Phosphocholines	#N/A	#N/A	#N/A	#N/A	#N/A	#N/A	#N/A	#N/A	#N/A	#N/A	#N/A	#N/A	#N/A	#N/A	#N/A	#N/A	#N/A	#N/A
427	2-(5Z_8Z_11Z_14Z-eicosatetraenoyl)-sn-glycero-3-phosphocholine	LMGP01050121	Phosphocholines	#N/A	#N/A	#N/A	#N/A	#N/A	#N/A	#N/A	#N/A	#N/A	#N/A	#N/A	#N/A	#N/A	#N/A	#N/A	#N/A	#N/A	#N/A
428	2-(2E_4E-decadienoyl)-3-(2E_4E-decadienoyl)-sn-glycero-1-phosphocholine	LMGP01010405	Phosphocholines	#N/A	#N/A	#N/A	#N/A	#N/A	#N/A	#N/A	#N/A	#N/A	#N/A	#N/A	#N/A	#N/A	#N/A	#N/A	#N/A	#N/A	#N/A
429	2-(2E-propionyl)-3-hexadecyl-sn-glycero-1-phosphocholine	LMGP01020071	Phosphocholines	#N/A	#N/A	#N/A	#N/A	#N/A	#N/A	#N/A	#N/A	#N/A	#N/A	#N/A	#N/A	#N/A	#N/A	#N/A	#N/A	#N/A	#N/A
430	1_2-diphytanyl-sn-glycero-3-phosphocholine	LMGP01040099	Phosphocholines	#N/A	#N/A	#N/A	#N/A	#N/A	#N/A	#N/A	#N/A	#N/A	#N/A	#N/A	#N/A	#N/A	#N/A	#N/A	#N/A	#N/A	#N/A
431	1_2-di-(9E-octadecenoyl)-sn-glycero-3-phosphocholine	LMGP01010876	Phosphocholines	#N/A	#N/A	#N/A	#N/A	#N/A	#N/A	#N/A	#N/A	#N/A	#N/A	#N/A	#N/A	#N/A	#N/A	#N/A	#N/A	#N/A	#N/A
432	1_2-di-(6Z-octadecenoyl)-sn-glycero-3-phosphocholine	LMGP01010868	Phosphocholines	#N/A	#N/A	#N/A	#N/A	#N/A	#N/A	#N/A	#N/A	#N/A	#N/A	#N/A	#N/A	#N/A	#N/A	#N/A	#N/A	#N/A	#N/A
433	1-undecanoyl-2-tridecanoyl-sn-glycero-3-phosphocholine	LMGP01010410	Phosphocholines	#N/A	#N/A	#N/A	#N/A	#N/A	#N/A	#N/A	#N/A	#N/A	#N/A	#N/A	#N/A	#N/A	#N/A	#N/A	#N/A	#N/A	#N/A
434	1-tridecyl-2-methyl-sn-glycero-3-phosphocholine	LMGP01040020	Phosphocholines	#N/A	#N/A	#N/A	#N/A	#N/A	#N/A	#N/A	#N/A	#N/A	#N/A	#N/A	#N/A	#N/A	#N/A	#N/A	#N/A	#N/A	#N/A
435	1-tridecanoyl-sn-glycero-3-phosphocholine	LMGP01050011	Phosphocholines	#N/A	#N/A	#N/A	#N/A	#N/A	#N/A	#N/A	#N/A	#N/A	#N/A	#N/A	#N/A	#N/A	#N/A	#N/A	#N/A	#N/A	#N/A
436	1-tetradecyl-2-methyl-sn-glycero-3-phosphocholine	LMGP01040021	Phosphocholines	#N/A	#N/A	#N/A	#N/A	#N/A	#N/A	#N/A	#N/A	#N/A	#N/A	#N/A	#N/A	#N/A	#N/A	#N/A	#N/A	#N/A	#N/A
437	1-tetradecyl-2-(9Z_12Z-octadecadienoyl)-sn-glycero-3-phosphocholine	LMGP01020017	Phosphocholines	#N/A	#N/A	#N/A	#N/A	#N/A	#N/A	#N/A	#N/A	#N/A	#N/A	#N/A	#N/A	#N/A	#N/A	#N/A	#N/A	#N/A	#N/A
438	1-tetradecanoyl-2-hexadecanoyl-sn-glycero-3-phosphosulfocholine	LMGP00000052	Phosphocholines	#N/A	#N/A	#N/A	#N/A	#N/A	#N/A	#N/A	#N/A	#N/A	#N/A	#N/A	#N/A	#N/A	#N/A	#N/A	#N/A	#N/A	#N/A
439	1-propionyl-2-hexadecyl-sn-glycero-3-phosphocholine	LMGP01020139	Phosphocholines	#N/A	#N/A	#N/A	#N/A	#N/A	#N/A	#N/A	#N/A	#N/A	#N/A	#N/A	#N/A	#N/A	#N/A	#N/A	#N/A	#N/A	#N/A
440	1-pentadecyl-2-acetyl-sn-glycero-3-phosphocholine	LMGP01020025	Phosphocholines	#N/A	#N/A	#N/A	#N/A	#N/A	#N/A	#N/A	#N/A	#N/A	#N/A	#N/A	#N/A	#N/A	#N/A	#N/A	#N/A	#N/A	#N/A
441	N-heptanoyl-homoserine lactone	LMFA08030006	Phosphatidylserines	#N/A	#N/A	#N/A	#N/A	#N/A	#N/A	#N/A	#N/A	#N/A	#N/A	#N/A	#N/A	#N/A	#N/A	#N/A	#N/A	#N/A	#N/A
442	N-butanoyl-lhomoserine lactone	LMFA08030002	Phosphatidylserines	#N/A	#N/A	#N/A	#N/A	#N/A	#N/A	#N/A	#N/A	#N/A	#N/A	#N/A	#N/A	#N/A	#N/A	#N/A	#N/A	#N/A	#N/A
443	2-hexadecanoyl-3-(9Z-octadecenoyl)-sn-glycero-1-phosphoserine	LMGP03010017	Phosphatidylserines	#N/A	#N/A	#N/A	#N/A	#N/A	#N/A	#N/A	#N/A	#N/A	#N/A	#N/A	#N/A	#N/A	#N/A	#N/A	#N/A	#N/A	#N/A
444	1_2-didodecanoyl-sn-glycero-3-phosphoserine	LMGP03010027	Phosphatidylserines	#N/A	#N/A	#N/A	#N/A	#N/A	#N/A	#N/A	#N/A	#N/A	#N/A	#N/A	#N/A	#N/A	#N/A	#N/A	#N/A	#N/A	#N/A
445	1_2-diacyl-sn-glycero-3-phosphoserine	LMGP03010000	Phosphatidylserines	#N/A	#N/A	#N/A	#N/A	#N/A	#N/A	#N/A	#N/A	#N/A	#N/A	#N/A	#N/A	#N/A	#N/A	#N/A	#N/A	#N/A	#N/A
446	1_2-di-(9Z_12Z-octadecadienoyl)-sn-glycero-3-phosphoserine	LMGP03010016	Phosphatidylserines	#N/A	#N/A	#N/A	#N/A	#N/A	#N/A	#N/A	#N/A	#N/A	#N/A	#N/A	#N/A	#N/A	#N/A	#N/A	#N/A	#N/A	#N/A
447	1_2-di-(9Z-octadecenoyl)-sn-glycero-3-phosphoserine	LMGP03010013	Phosphatidylserines	#N/A	#N/A	#N/A	#N/A	#N/A	#N/A	#N/A	#N/A	#N/A	#N/A	#N/A	#N/A	#N/A	#N/A	#N/A	#N/A	#N/A	#N/A
448	1-tridecanoyl-sn-glycero-3-phosphoserine	LMGP03050005	Phosphatidylserines	#N/A	#N/A	#N/A	#N/A	#N/A	#N/A	#N/A	#N/A	#N/A	#N/A	#N/A	#N/A	#N/A	#N/A	#N/A	#N/A	#N/A	#N/A
449	1-octadecanoyl-2-(4Z_7Z_10Z_13Z_16Z_19Z-docosahexaenoyl)-sn-glycero-3-phosphoserine	LMGP03010040	Phosphatidylserines	#N/A	#N/A	#N/A	#N/A	#N/A	#N/A	#N/A	#N/A	#N/A	#N/A	#N/A	#N/A	#N/A	#N/A	#N/A	#N/A	#N/A	#N/A
450	1-dodecanoyl-2-tridecanoyl-sn-glycero-3-phosphoserine (ammonium salt)	LMGP03010001	Phosphatidylserines	#N/A	#N/A	#N/A	#N/A	#N/A	#N/A	#N/A	#N/A	#N/A	#N/A	#N/A	#N/A	#N/A	#N/A	#N/A	#N/A	#N/A	#N/A
451	Pentobarbital	C07422	Xenobiotics	#N/A	#N/A	#N/A	#N/A	#N/A	#N/A	#N/A	#N/A	#N/A	#N/A	#N/A	#N/A	#N/A	#N/A	#N/A	#N/A	#N/A	#N/A
452	Biliverdin	C00500	Hemolysis markers	#N/A	#N/A	#N/A	#N/A	#N/A	#N/A	#N/A	#N/A	#N/A	#N/A	#N/A	#N/A	#N/A	#N/A	#N/A	#N/A	#N/A	#N/A
453	Bilirubin	C00486	Hemolysis markers	#N/A	#N/A	#N/A	#N/A	#N/A	#N/A	#N/A	#N/A	#N/A	#N/A	#N/A	#N/A	#N/A	#N/A	#N/A	#N/A	#N/A	#N/A
454	Hemine	C06767	Hemolysis markers	#N/A	#N/A	#N/A	#N/A	#N/A	#N/A	#N/A	#N/A	#N/A	#N/A	#N/A	#N/A	#N/A	#N/A	#N/A	#N/A	#N/A	#N/A
455	Acetyl phosphate	C00227	Other	#N/A	#N/A	#N/A	#N/A	#N/A	#N/A	#N/A	#N/A	#N/A	#N/A	#N/A	#N/A	#N/A	#N/A	#N/A	#N/A	#N/A	#N/A
456	Triacanthine	C08435	Other	#N/A	#N/A	#N/A	#N/A	#N/A	#N/A	#N/A	#N/A	#N/A	#N/A	#N/A	#N/A	#N/A	#N/A	#N/A	#N/A	#N/A	#N/A
457	1-Hydroxy-2-aminoethylphosphonate	C05678	Other	#N/A	#N/A	#N/A	#N/A	#N/A	#N/A	#N/A	#N/A	#N/A	#N/A	#N/A	#N/A	#N/A	#N/A	#N/A	#N/A	#N/A	#N/A
458	N5-Methyl-L-glutamine	C03153	Other	#N/A	#N/A	#N/A	#N/A	#N/A	#N/A	#N/A	#N/A	#N/A	#N/A	#N/A	#N/A	#N/A	#N/A	#N/A	#N/A	#N/A	#N/A
459	2-Methyleneglutarate	C02930	Other	#N/A	#N/A	#N/A	#N/A	#N/A	#N/A	#N/A	#N/A	#N/A	#N/A	#N/A	#N/A	#N/A	#N/A	#N/A	#N/A	#N/A	#N/A
460	6-Pyruvoyltetrahydropterin	C03684	Other	#N/A	#N/A	#N/A	#N/A	#N/A	#N/A	#N/A	#N/A	#N/A	#N/A	#N/A	#N/A	#N/A	#N/A	#N/A	#N/A	#N/A	#N/A
461	6-Lactoyl-5-6-7-8-tetrahydropterin	C04244	Other	#N/A	#N/A	#N/A	#N/A	#N/A	#N/A	#N/A	#N/A	#N/A	#N/A	#N/A	#N/A	#N/A	#N/A	#N/A	#N/A	#N/A	#N/A
462	4-Aminobenzoate	C00568	Other	#N/A	#N/A	#N/A	#N/A	#N/A	#N/A	#N/A	#N/A	#N/A	#N/A	#N/A	#N/A	#N/A	#N/A	#N/A	#N/A	#N/A	#N/A
463	Ergothionine	C02732	Other	#N/A	#N/A	#N/A	#N/A	#N/A	#N/A	#N/A	#N/A	#N/A	#N/A	#N/A	#N/A	#N/A	#N/A	#N/A	#N/A	#N/A	#N/A
464	6-Aminohexanoate	C02378	Other	#N/A	#N/A	#N/A	#N/A	#N/A	#N/A	#N/A	#N/A	#N/A	#N/A	#N/A	#N/A	#N/A	#N/A	#N/A	#N/A	#N/A	#N/A
465	Leucocyanidin	C05906	Other	#N/A	#N/A	#N/A	#N/A	#N/A	#N/A	#N/A	#N/A	#N/A	#N/A	#N/A	#N/A	#N/A	#N/A	#N/A	#N/A	#N/A	#N/A
466	L-4-Hydroxyglutamate semialdehyde	C05938	Other	#N/A	#N/A	#N/A	#N/A	#N/A	#N/A	#N/A	#N/A	#N/A	#N/A	#N/A	#N/A	#N/A	#N/A	#N/A	#N/A	#N/A	#N/A
467	Methylenediurea	C06381	Other	#N/A	#N/A	#N/A	#N/A	#N/A	#N/A	#N/A	#N/A	#N/A	#N/A	#N/A	#N/A	#N/A	#N/A	#N/A	#N/A	#N/A	#N/A
468	beta-Butoxyethyl nicotinate	C13138	Other	#N/A	#N/A	#N/A	#N/A	#N/A	#N/A	#N/A	#N/A	#N/A	#N/A	#N/A	#N/A	#N/A	#N/A	#N/A	#N/A	#N/A	#N/A
469	3-Oxalomalate	C01990	Other	#N/A	#N/A	#N/A	#N/A	#N/A	#N/A	#N/A	#N/A	#N/A	#N/A	#N/A	#N/A	#N/A	#N/A	#N/A	#N/A	#N/A	#N/A
470	2-Deoxy-alpha-D-glucoside	C03573	Other	#N/A	#N/A	#N/A	#N/A	#N/A	#N/A	#N/A	#N/A	#N/A	#N/A	#N/A	#N/A	#N/A	#N/A	#N/A	#N/A	#N/A	#N/A
471	cis-p-Coumarate	C06738	Other	#N/A	#N/A	#N/A	#N/A	#N/A	#N/A	#N/A	#N/A	#N/A	#N/A	#N/A	#N/A	#N/A	#N/A	#N/A	#N/A	#N/A	#N/A
472	N-Acetyl-leucyl-leucine	C11333	Other	#N/A	#N/A	#N/A	#N/A	#N/A	#N/A	#N/A	#N/A	#N/A	#N/A	#N/A	#N/A	#N/A	#N/A	#N/A	#N/A	#N/A	#N/A
473	N-Acyl-D-mannosaminolactone	C03792	Other	#N/A	#N/A	#N/A	#N/A	#N/A	#N/A	#N/A	#N/A	#N/A	#N/A	#N/A	#N/A	#N/A	#N/A	#N/A	#N/A	#N/A	#N/A
474	N6-Methyl-L-lysine	C02728	Other	#N/A	#N/A	#N/A	#N/A	#N/A	#N/A	#N/A	#N/A	#N/A	#N/A	#N/A	#N/A	#N/A	#N/A	#N/A	#N/A	#N/A	#N/A
475	S-Formylglutathione	C01031	Other	#N/A	#N/A	#N/A	#N/A	#N/A	#N/A	#N/A	#N/A	#N/A	#N/A	#N/A	#N/A	#N/A	#N/A	#N/A	#N/A	#N/A	#N/A
476	N1-Acetylspermine	C02567	Other	#N/A	#N/A	#N/A	#N/A	#N/A	#N/A	#N/A	#N/A	#N/A	#N/A	#N/A	#N/A	#N/A	#N/A	#N/A	#N/A	#N/A	#N/A
477	Diallyl sulfide	C08370	Other	#N/A	#N/A	#N/A	#N/A	#N/A	#N/A	#N/A	#N/A	#N/A	#N/A	#N/A	#N/A	#N/A	#N/A	#N/A	#N/A	#N/A	#N/A
478	Shikimate 3-phosphate	C03175	Other	#N/A	#N/A	#N/A	#N/A	#N/A	#N/A	#N/A	#N/A	#N/A	#N/A	#N/A	#N/A	#N/A	#N/A	#N/A	#N/A	#N/A	#N/A
479	D-glucono-1,5-lactone	C00198	Other	#N/A	#N/A	#N/A	#N/A	#N/A	#N/A	#N/A	#N/A	#N/A	#N/A	#N/A	#N/A	#N/A	#N/A	#N/A	#N/A	#N/A	#N/A
480	2-Dehydro-3-deoxy-D-glucarate	C03921	Other	#N/A	#N/A	#N/A	#N/A	#N/A	#N/A	#N/A	#N/A	#N/A	#N/A	#N/A	#N/A	#N/A	#N/A	#N/A	#N/A	#N/A	#N/A
481	Poly-gamma-D-glutamate	C05723	Other	#N/A	#N/A	#N/A	#N/A	#N/A	#N/A	#N/A	#N/A	#N/A	#N/A	#N/A	#N/A	#N/A	#N/A	#N/A	#N/A	#N/A	#N/A
482	Dihydroflavonol	C15570	Other	#N/A	#N/A	#N/A	#N/A	#N/A	#N/A	#N/A	#N/A	#N/A	#N/A	#N/A	#N/A	#N/A	#N/A	#N/A	#N/A	#N/A	#N/A
483	Catechol	C00090	Other	#N/A	#N/A	#N/A	#N/A	#N/A	#N/A	#N/A	#N/A	#N/A	#N/A	#N/A	#N/A	#N/A	#N/A	#N/A	#N/A	#N/A	#N/A
484	Ferric gluconate	C13511	Other	#N/A	#N/A	#N/A	#N/A	#N/A	#N/A	#N/A	#N/A	#N/A	#N/A	#N/A	#N/A	#N/A	#N/A	#N/A	#N/A	#N/A	#N/A
485	Catechin	C17590	Other	#N/A	#N/A	#N/A	#N/A	#N/A	#N/A	#N/A	#N/A	#N/A	#N/A	#N/A	#N/A	#N/A	#N/A	#N/A	#N/A	#N/A	#N/A
486	6-Thioxanthine 5--monophosphate	C16618	Other	#N/A	#N/A	#N/A	#N/A	#N/A	#N/A	#N/A	#N/A	#N/A	#N/A	#N/A	#N/A	#N/A	#N/A	#N/A	#N/A	#N/A	#N/A
487	Deoxyribose triphosphate	C12347	Other	#N/A	#N/A	#N/A	#N/A	#N/A	#N/A	#N/A	#N/A	#N/A	#N/A	#N/A	#N/A	#N/A	#N/A	#N/A	#N/A	#N/A	#N/A
488	D-Ribitol 5-phosphate	C01068	Other	#N/A	#N/A	#N/A	#N/A	#N/A	#N/A	#N/A	#N/A	#N/A	#N/A	#N/A	#N/A	#N/A	#N/A	#N/A	#N/A	#N/A	#N/A
489	Riboflavin	C00255	Other	#N/A	#N/A	#N/A	#N/A	#N/A	#N/A	#N/A	#N/A	#N/A	#N/A	#N/A	#N/A	#N/A	#N/A	#N/A	#N/A	#N/A	#N/A
490	Fe(III)dicitrate	C06229	Other	#N/A	#N/A	#N/A	#N/A	#N/A	#N/A	#N/A	#N/A	#N/A	#N/A	#N/A	#N/A	#N/A	#N/A	#N/A	#N/A	#N/A	#N/A
491	Glucosinolate	C17260	Other	#N/A	#N/A	#N/A	#N/A	#N/A	#N/A	#N/A	#N/A	#N/A	#N/A	#N/A	#N/A	#N/A	#N/A	#N/A	#N/A	#N/A	#N/A
492	Succinyl sulfathiazole	C11745	Other	#N/A	#N/A	#N/A	#N/A	#N/A	#N/A	#N/A	#N/A	#N/A	#N/A	#N/A	#N/A	#N/A	#N/A	#N/A	#N/A	#N/A	#N/A
493	D-Ribose 5-diphosphate	C01095	Other	#N/A	#N/A	#N/A	#N/A	#N/A	#N/A	#N/A	#N/A	#N/A	#N/A	#N/A	#N/A	#N/A	#N/A	#N/A	#N/A	#N/A	#N/A
494	Thioredoxin disulfide	C00343	Other	#N/A	#N/A	#N/A	#N/A	#N/A	#N/A	#N/A	#N/A	#N/A	#N/A	#N/A	#N/A	#N/A	#N/A	#N/A	#N/A	#N/A	#N/A
495	alpha-N-Peptidyl-L-glutamate	C03904	Other	#N/A	#N/A	#N/A	#N/A	#N/A	#N/A	#N/A	#N/A	#N/A	#N/A	#N/A	#N/A	#N/A	#N/A	#N/A	#N/A	#N/A	#N/A
496	D-Alanyl-alanyl-poly(glycerolphosphate)	C04457	Other	#N/A	#N/A	#N/A	#N/A	#N/A	#N/A	#N/A	#N/A	#N/A	#N/A	#N/A	#N/A	#N/A	#N/A	#N/A	#N/A	#N/A	#N/A
497	alpha-N-Peptidyl-L-glutamine	C03905	Other	#N/A	#N/A	#N/A	#N/A	#N/A	#N/A	#N/A	#N/A	#N/A	#N/A	#N/A	#N/A	#N/A	#N/A	#N/A	#N/A	#N/A	#N/A
498	S-Acylglutathione	C02589	Other	#N/A	#N/A	#N/A	#N/A	#N/A	#N/A	#N/A	#N/A	#N/A	#N/A	#N/A	#N/A	#N/A	#N/A	#N/A	#N/A	#N/A	#N/A
499	1-O-Galloyl-beta-D-glucose	C01158	Other	#N/A	#N/A	#N/A	#N/A	#N/A	#N/A	#N/A	#N/A	#N/A	#N/A	#N/A	#N/A	#N/A	#N/A	#N/A	#N/A	#N/A	#N/A
500	Vanillate	C06672	Other	#N/A	#N/A	#N/A	#N/A	#N/A	#N/A	#N/A	#N/A	#N/A	#N/A	#N/A	#N/A	#N/A	#N/A	#N/A	#N/A	#N/A	#N/A
501	Pyridoxamine	C00534	Other	#N/A	#N/A	#N/A	#N/A	#N/A	#N/A	#N/A	#N/A	#N/A	#N/A	#N/A	#N/A	#N/A	#N/A	#N/A	#N/A	#N/A	#N/A
502	9-Oxononanoic acid	C16322	Other	#N/A	#N/A	#N/A	#N/A	#N/A	#N/A	#N/A	#N/A	#N/A	#N/A	#N/A	#N/A	#N/A	#N/A	#N/A	#N/A	#N/A	#N/A
503	N-Amidino-L-aspartate	C03139	Other	#N/A	#N/A	#N/A	#N/A	#N/A	#N/A	#N/A	#N/A	#N/A	#N/A	#N/A	#N/A	#N/A	#N/A	#N/A	#N/A	#N/A	#N/A
504	threo-3-Hydroxy-L-aspartate	C11511	Other	#N/A	#N/A	#N/A	#N/A	#N/A	#N/A	#N/A	#N/A	#N/A	#N/A	#N/A	#N/A	#N/A	#N/A	#N/A	#N/A	#N/A	#N/A
505	N-Acyl-D-glutamate	C06379	Other	#N/A	#N/A	#N/A	#N/A	#N/A	#N/A	#N/A	#N/A	#N/A	#N/A	#N/A	#N/A	#N/A	#N/A	#N/A	#N/A	#N/A	#N/A
506	L-Noradrenaline	C00547	Other	#N/A	#N/A	#N/A	#N/A	#N/A	#N/A	#N/A	#N/A	#N/A	#N/A	#N/A	#N/A	#N/A	#N/A	#N/A	#N/A	#N/A	#N/A
507	Glycerone sulfate	C02543	Other	#N/A	#N/A	#N/A	#N/A	#N/A	#N/A	#N/A	#N/A	#N/A	#N/A	#N/A	#N/A	#N/A	#N/A	#N/A	#N/A	#N/A	#N/A
508	Protein glutamine	C02583	Other	#N/A	#N/A	#N/A	#N/A	#N/A	#N/A	#N/A	#N/A	#N/A	#N/A	#N/A	#N/A	#N/A	#N/A	#N/A	#N/A	#N/A	#N/A
509	Hydroxyacetone phosphate	C03505	Other	#N/A	#N/A	#N/A	#N/A	#N/A	#N/A	#N/A	#N/A	#N/A	#N/A	#N/A	#N/A	#N/A	#N/A	#N/A	#N/A	#N/A	#N/A
510	N-Acyl-D-aspartate	C06380	Other	#N/A	#N/A	#N/A	#N/A	#N/A	#N/A	#N/A	#N/A	#N/A	#N/A	#N/A	#N/A	#N/A	#N/A	#N/A	#N/A	#N/A	#N/A
511	6-Carboxyhexanoate	C02656	Other	#N/A	#N/A	#N/A	#N/A	#N/A	#N/A	#N/A	#N/A	#N/A	#N/A	#N/A	#N/A	#N/A	#N/A	#N/A	#N/A	#N/A	#N/A
512	N-Acetylmethionine	C02712	Other	#N/A	#N/A	#N/A	#N/A	#N/A	#N/A	#N/A	#N/A	#N/A	#N/A	#N/A	#N/A	#N/A	#N/A	#N/A	#N/A	#N/A	#N/A
513	beta-D-Glucuronoside	C03033	Other	#N/A	#N/A	#N/A	#N/A	#N/A	#N/A	#N/A	#N/A	#N/A	#N/A	#N/A	#N/A	#N/A	#N/A	#N/A	#N/A	#N/A	#N/A
514	7-8-Dihydroxycoumarin	C03093	Other	#N/A	#N/A	#N/A	#N/A	#N/A	#N/A	#N/A	#N/A	#N/A	#N/A	#N/A	#N/A	#N/A	#N/A	#N/A	#N/A	#N/A	#N/A
515	10-Hydroxydecanoic acid	C02774	Other	#N/A	#N/A	#N/A	#N/A	#N/A	#N/A	#N/A	#N/A	#N/A	#N/A	#N/A	#N/A	#N/A	#N/A	#N/A	#N/A	#N/A	#N/A
516	Protein 5-hydroxylysine	C03429	Other	#N/A	#N/A	#N/A	#N/A	#N/A	#N/A	#N/A	#N/A	#N/A	#N/A	#N/A	#N/A	#N/A	#N/A	#N/A	#N/A	#N/A	#N/A
517	trans-Homoaconitate	C16579	Other	#N/A	#N/A	#N/A	#N/A	#N/A	#N/A	#N/A	#N/A	#N/A	#N/A	#N/A	#N/A	#N/A	#N/A	#N/A	#N/A	#N/A	#N/A
518	Oxalosuccinate	C05379	Other	#N/A	#N/A	#N/A	#N/A	#N/A	#N/A	#N/A	#N/A	#N/A	#N/A	#N/A	#N/A	#N/A	#N/A	#N/A	#N/A	#N/A	#N/A
519	N-Carbamyl-L-glutamate	C05829	Other	#N/A	#N/A	#N/A	#N/A	#N/A	#N/A	#N/A	#N/A	#N/A	#N/A	#N/A	#N/A	#N/A	#N/A	#N/A	#N/A	#N/A	#N/A
520	2-Oxo-7-methylthioheptanoic acid	C17220	Other	#N/A	#N/A	#N/A	#N/A	#N/A	#N/A	#N/A	#N/A	#N/A	#N/A	#N/A	#N/A	#N/A	#N/A	#N/A	#N/A	#N/A	#N/A
521	L-Homocitrulline	C02427	Other	#N/A	#N/A	#N/A	#N/A	#N/A	#N/A	#N/A	#N/A	#N/A	#N/A	#N/A	#N/A	#N/A	#N/A	#N/A	#N/A	#N/A	#N/A
522	Homomethionine	C17213	Other	#N/A	#N/A	#N/A	#N/A	#N/A	#N/A	#N/A	#N/A	#N/A	#N/A	#N/A	#N/A	#N/A	#N/A	#N/A	#N/A	#N/A	#N/A
