# Supplementary material for: Metabolic Reprogramming of Mouse Bone Marrow Derived Macrophages Following Erythrophagocytosis
Source: Front Physiol. 2020 Apr 30;11:396. doi: 10.3389/fphys.2020.00396 (PMC7204509; doi:10.3389/fphys.2020.00396)
Supplement: Supplementary file 4 [file Table_3.XLSX]

## Sheet: Global
5MM (+,-); Cell Extracts								BMDM Ctrl (Method 1)				BMDM (+) IgG (Method 1)				BLANKS (BLK)					TECHMIXES (TM)				TM Stats				METHOD 1					DATA SCALING
N.	Compound (Cmpd)	CmpdID	Pathway	Parent	MedMz	MedRt	Polarity	BMDM Ctrl, M1	BMDM Ctrl, M2	BMDM Ctrl, M3	BMDM Ctrl, M4	BMDM IgG, M1	BMDM IgG, M2	BMDM IgG, M3	BMDM IgG, M4	Postblk	Preblk1	Preblk2	Preblk3	Flush	Techmix0+	Techmix1+	Techmix2+	Techmix3+	STDEV.P	MEAN	CV		MEDIAN (Ctrl)	MEDIAN (IgG)	FOLD CHANGE (Ctrl/IgG)	P.VALUE		Correction Factour (CF)	Metabolite Abbreviation
1	L-Alanine	C00041	Amino acids	90.0557	90.0557	0.675795	+	275245	665477	206243	174613	255152	412337	188558	163056	501317	471941	722895	314452	0	353772	327700	338879	324271	11516.3	336156	0.0342587		240744	221855	0.921539	0.572427
2	L-Arginine	C00062	Amino acids	175.119	175.119	0.647	+	622518	882105	787166	725164	585431	1014915	621353	841956	129609	85644.5	87415.5	63268.9	3490.21	1693918	2213778	2143020	2123180	204607	2043474	0.100127		756165	731655	0.967586	0.921995
3	L-Asparagine	C00152	Amino acids	133.061	133.061	0.872813	+	17813.2	20013.7	23816.7	20786.5	17263	21459.2	22923	19996.1	15906.7	32433.2	33305.2	53223.7	16769.6	21161.6	24912.3	24101.8	22130.6	1498.57	23076.6	0.0649391		20400.1	20727.6	1.01606	0.913056		9.09869	ARG
4	L-Aspartate	C00049	Amino acids	134.045	134.045	0.672391	+	30594.2	47666.2	27219.7	28069	23395.5	45472.2	38270.1	29714	158566	123071	148047	9225.85	0	39117.1	50174.6	44830.8	56481.4	6425.07	47650.9	0.134836		29331.6	33992	1.15889	0.907621		114.492	ASP
5	L-Cysteine	C00097	Amino acids	122.027	122.027	0.70439	+	28892.3	81083.8	1987.46	3123.03	14615.5	18609.8	890.64	750.1	0	608.459	828.491	436.301	0	1292.01	2114.08	1250.58	745.642	490.488	1350.58	0.363169		16007.7	7753.05	0.484333	0.333721
6	L-Glutamate	C00025	Amino acids	148.061	148.061	0.689035	+	332016	349265	176588	212239	304822	487901	255546	250575	288776	184602	266362	240479	2233.2	306666	375982	353740	331525	25743	341978	0.0752767		272127	280184	1.02961	0.447652		21.8888	GLU
7	L-Glutamine	C00064	Amino acids	147.077	147.077	0.673245	+	392899	661128	484901	653924	420072	716419	651495	692991	561491	470969	481722	418882	0	1070497	1347404	1082866	1231905	114132	1183168	0.0964626		569413	672243	1.18059	0.475749		9.73073	GLN
8	Glycine	C00037	Amino acids	76.0402	76.0402	1.77316	+	1070421	1092492	1167706	1107505	1189155	1105530	1084013	1151191	1122355	1394730	1470907	1273167	5515.21	1114415	989529	1101000	1035120	50564.7	1.06002e+06	0.0477018		1.1e+06	1.12836e+06	1.02578	0.492798
9	L-Histidine	C00135	Amino acids	156.077	156.077	0.637083	+	109911	184318	164033	156312	110131	207066	146642	192567	128288	66544.1	137325	99594	74954.5	248114	294504	305984	302620	23292.8	287806	0.0809326		160173	169604	1.05889	0.713332		14.3183	HIS
10	L-Leucine	C00123	Amino acids	132.102	132.102	1.01475	+	31700000	92700000	21800000	42700000	28900000	59800000	45200000	25000000	550263	362875	381888	23191.4	34584.4	32100000	43900000	39400000	43700000	4.78193e+06	39775000	0.120225		37200000	37050000	0.995968	0.685886
11	L-Isoleucine	C00407	Amino acids	132.102	132.102	0.952668	+	15600000	29901	18500000	30200000	16000000	32900000	50196.5	26700000	550263	278213	265618	28705.6	36858.3	49193.2	26900000	39400000	30100000	1.46319e+07	2.41123e+07	0.606823		17050000	21350000	1.2522	0.775887
12	L-Lysine	C00047	Amino acids	147.113	147.113	0.612235	+	453014	921700	493179	735807	469915	947221	658260	669654	83769.7	58684.4	72536.6	7921.36	15990.2	1286293	1272487	1164852	1249614	47154.6	1.24331e+06	0.0379266		614493	663957	1.0805	0.818453
13	L-Methionine	C00073	Amino acids	150.058	150.058	0.896987	+	6028006	8.51574e+06	3755267	6479682	5476401	11800000	5462502	5217236	100968	89712.9	117166	3369.07	1196.4	8001786	8015380	9177153	7586402	592581	8.19518e+06	0.0723085		6253844	5.46945e+06	0.874574	0.687144		1.46345	MET
14	L-Phenylalanine	C00079	Amino acids	166.086	166.086	1.42638	+	14700000	28300000	9067133	16600000	10800000	27000000	14400000	12800000	210650	131916	147290	4178.32	5184.3	12700000	14500000	12400000	17400000	1.98809e+06	14250000	0.139515		15650000	13600000	0.86901	0.871961
15	L-Proline	C00148	Amino acids	116.071	116.071	0.708961	+	432792	844454	191500	264002	391181	570283	314305	316328	250029	393824	428093	187810	209693	508083	506350	516895	473589	16451.4	501229	0.0328221		348397	353754	1.01538	0.831271
16	L-Serine	C00065	Amino acids	106.05	106.05	0.666604	+	44093.1	89454.5	45727.4	36217.5	41828.9	76025.2	64569.1	50089.7	298412	190728	245702	14109.4	758.579	123671	125572	126491	113733	5087.5	122367	0.0415759		44910.2	57329.4	1.27653	0.775095		47.5029	SER
17	L-Threonine	C00188	Amino acids	120.066	120.066	0.673859	+	164827	354929	174353	212268	179208	319583	186806	256425	204075	126977	167686	135072	0	338395	406572	365457	479163	53083.4	397397	0.133578		193310	221615	1.14642	0.876555
18	L-Tryptophan	C00078	Amino acids	205.097	205.097	1.7419	+	3833556	6700414	2722866	5199784	4194943	7533096	5289424	5658744	95836.1	86045.7	92107.8	64830.7	318.529	6311948	4723956	5470006	5675256	566770	5.54529e+06	0.102207		4516670	5474084	1.21197	0.376938
19	L-Tyrosine	C00082	Amino acids	182.081	182.081	0.919191	+	6675026	15200000	6471962	10900000	8040026	12600000	11100000	7551066	201646	127870	156630	4370.47	2127.86	10500000	10400000	10200000	9958122	207273	1.02645e+07	0.0201931		8787513	9570013	1.08905	0.996478
20	L-Valine	C00183	Amino acids	118.087	118.087	0.775296	+	4152630	9798137	3867376	6427140	3598654	7460578	6090614	4112677	798547	396282	799171	616642	358136	4231396	5597054	7242610	6548042	1.12899e+06	5.90478e+06	0.1912		5289885	5.10165e+06	0.964415	0.664722
21	L-Cystine	C00491	Amino acids	239.016	239.016	0.64325	-	14201.8	21136.3	51462.4	84124.8	12357.7	24404.7	42203.4	72783.8	0	0	0	0	0	106150	73515.6	113466	104432	15319.5	99390.9	0.154134		36299.3	33304	0.917483	0.824518		2.12275	CYSS
22	Adenine	C00147	Nucleotides	136.062	136.062	0.8039	+	148828	205512	108552	129433	162933	136810	127911	88920.9	184900	0	139400	62996.6	15917.7	114791	130244	188664	157820	28142.6	147880	0.190308		139130	132361	0.951341	0.491695
23	Adenosine	C00212	Nucleotides	268.104	268.104	0.91495	+	182658	347714	145363	239283	141774	193176	127658	118432	27115	0	31794.1	0	0	118501	111390	111956	128592	6928.99	117610	0.0589151		210970	134716	0.638552	0.126987
24	AMP	C00020	Nucleotides	348.07	348.07	0.824276	+	964455	1755950	387850	502804	770780	1194745	425968	236003	15869.9	0	11433.9	18626.9	0	438498	530279	745874	564195	111619	569712	0.195923		733629	598374	0.815635	0.53657
25	Guanine	C00242	Nucleotides	152.055	152.056	0.890095	+	271271	798647	178547	308778	235366	543744	252751	236752	9709.28	0	4797.77	1741.78	0	378763	365293	433844	350742	31441.7	382160	0.0822735		290024	244751	0.843899	0.664718
26	Guanosine	C00387	Nucleotides	284.099	284.099	0.969627	+	16183.2	42855.1	7539.31	2869.79	26243.3	28717.2	6519.77	7648.67	3096.87	0	2628.14	646.716	585.418	20096.7	14851.2	22453.9	19570.2	2758.33	19243	0.143342		11861.2	16946	1.42869	0.994313
27	GMP	C00144	Nucleotides	364.065	364.065	0.868076	+	385042	630014	135894	118164	339438	505548	136262	107527	556.891	0	1000.93	1062.16	0	127718	147226	152448	167900	14361.6	148823	0.0965015		260468	237850	0.913165	0.77764
28	Thymine	C00178	Nucleotides	127.05	127.05	1.386	+	33899.5	56218.5	15580.7	14503.6	25052.7	50425.9	14375.8	14656.6	0	22903	23481.3	17462.6	4953.98	21267.3	18681.9	17987.6	19806.5	1240.7	19435.8	0.0638355		24740.1	19854.7	0.802529	0.772149
29	Thymidine	C00214	Nucleotides	243.099	243.099	1.77144	+	15341.4	2609.32	177395	7047.2	18649.8	8620.92	27744.7	20294.7	10172.6	9478.04	14620.5	11965.2	472.828	19494.4	28181.6	28267.2	26250.5	3587.09	25548.4	0.140404		11194.3	19472.2	1.73947	0.483291
30	5-6-Dihydrothymine	C00906	Nucleotides	129.066	129.066	0.695782	+	61694.6	80620.7	42970.6	66287.6	60431.4	68406.5	68484.8	98121.2	71635.2	59925.6	105340	71450.3	0	95885.4	91813.5	85215.8	71325.2	9320.23	86060	0.108299		63991.1	68445.7	1.06961	0.372046
31	Cytidine	C00475	Nucleotides	244.093	244.093	0.764247	+	49522.3	147298	11135.9	16579.3	45834.4	82286.7	19256.3	15394.1	673.263	0	0	0	0	44770.6	49244.7	34743	42070.4	5263.81	42707.2	0.123254		33050.8	32545.4	0.984708	0.675566
32	Cytosine	C00380	Nucleotides	112.051	112.051	0.863196	+	69702.1	103736	15536.9	16462.3	54557.9	104415	19536.8	14677.3	7233.54	23994.1	14463.9	19812.9	17949.7	16320.7	21365.5	26711.1	27324.5	4464.83	22930.5	0.194712		43082.2	37047.4	0.859923	0.92175
33	Uridine	C00299	Nucleotides: pyrimidine metabolism	245.077	245.077	0.896814	+	10919.6	27479.1	13986.4	15301.9	17090	25543.9	17023.1	16654	2457.36	2499.41	1991.11	0	523.874	25969.5	25225.7	26888.4	17186.4	3873.52	23817.5	0.162633		14644.1	17056.6	1.16474	0.628362
34	5'-Acylphosphouridine	C03086	Nucleotides: pyrimidine metabolism	392.034	392.034	0.816594	+	50290.6	67931.2	10166.3	19076.1	29606	43854.9	21903.3	9030.93	0	0	0	0	0	10918	13025.5	16908.7	11099.6	2409.6	12987.9	0.185526		34683.3	25754.7	0.742566	0.508117
35	Uracil	C00106	Nucleotides: pyrimidine metabolism	111.019	111.019	0.660609	-	107045	138146	133604	155848	153899	173352	182384	204864	122647	72997.8	65886.3	0	41899.2	107281	103242	120201	145232	16395.2	118989	0.137787		135875	177868	1.30906	0.0217485
36	UMP	C00105	Nucleotides: pyrimidine metabolism	325.043	325.043	0.7506	+	23292.7	48465.6	9357.37	8638.75	20995.9	30589.7	10500.1	11053.9	699.369	0	0	585.481	0	23085.3	19691.2	19416.9	20861.5	1445.98	20763.7	0.0696396		16325	16024.9	0.981613	0.704861
37	Urate	C00366	Nucleotides	169.035	169.035	0.890436	+	42469.5	81751	14090.8	19485	46692.8	63891.2	42007.9	15016.5	14169.5	9423.83	7482.85	478.099	0	38093.2	33131.6	49059.6	45350.2	6196.28	41408.6	0.149637		30977.3	44350.3	1.43171	0.898387
38	5-Hydroxyisourate	C11821	Nucleotides	185.032	185.032	0.663132	+	3216.03	5696.96	3813.31	5865.97	2587.83	4173.03	4330.1	9189.82	2261.03	0	0	0	0	12072.1	9243.75	9446.6	8345.85	1388.28	9777.08	0.141993		4755.14	4251.57	0.8941	0.797824
39	Inosine	C00294	Nucleotides: purine metabolism	269.088	269.088	0.979695	+	655673	1267181	94013.7	100570	610905	583882	104945	71461.7	2484.61	3582.34	980.597	0	0	313352	312219	386168	442822	54658.8	363640	0.15031		378121	344414	0.910856	0.575805		4.34542	INO
40	IMP	C00130	Nucleotides: purine metabolism	347.047	347.047	0.802237	+,-	27068.1	38010.9	9981.26	14119	10053.3	24404.3	10660.1	10781.9	6035.74	6877.41	7292.99	0	0	18911	23668.6	25232.1	21603.3	2367.97	22353.8	0.105932		20593.6	10721	0.520599	0.295817
41	Hypoxanthine (HPX)	C00262	Nucleotides: purine metabolism	137.046	137.046	0.889652	+	2905447	4.87265e+06	1040239	1361544	3576008	4987414	1284580	1223420	44065.3	26049.3	41475.5	538.292	551.247	1642012	1727209	1899430	1513423	140184	1.69552e+06	0.082679		2.1335e+06	2430294	1.13911	0.866537		2.16976	HPX
42	Xanthine	C00385	Nucleotides: purine metabolism	151.025	151.025	0.919042	-	99684.7	152256	37832.9	70882	92118.1	198618	88354.8	70410.8	7176.94	3018.32	3796.46	2138.76	6700.32	103000	105174	118370	116230	6693.75	110694	0.0604709		85283.3	90236.4	1.05808	0.579262		75.4901	XAN
43	Allantoate	C00499	Nucleotides	177.061	177.061	0.625236	+	2858.3	3724.82	12069.5	2929.95	3487.53	7742.47	18331.8	15899.4	10463.7	7193.92	14050.1	0	564.229	15775.7	10602.1	15063.5	14531.7	2007.03	13993.2	0.143428		3327.39	11820.9	3.55262	0.197934
44	(S)(+)-Allantoin	C02350	Nucleotides	159.052	159.052	0.700162	+	12535.7	15641.6	13471.2	18916.8	12476	18037.4	18578.3	20394.7	1902.63	1691.06	893.1	0	0	22816	22255.7	27431.8	23671.8	2020.02	24043.8	0.084014		14556.4	18307.9	1.25772	0.353657
45	Pyridoxal	C00250	Nucleotides	168.066	168.066	0.879096	+	121577	251054	35513.3	43232.1	155590	204737	57004.4	48764.2	2913.95	6510.72	4338.76	4797.87	4538.38	110465	127254	136183	133656	10025.7	126890	0.079011		82404.5	106297	1.28994	0.955235
46	Pyridoxamine 5'-phosphate	C00647	Nucleotides	249.061	249.061	1.74029	+	24907.9	13045.8	26369.4	47581.3	22709.9	16931.3	37387.2	38236.1	0	0	0	0	0	53377.9	45858.9	38073.4	42101.2	5639.6	44852.9	0.125736		25638.6	30048.5	1.172	0.928231
47	Nicotinamide	C00153	Nucleotides	123.056	123.056	0.906948	+	3815495	6532218	1488282	2135724	4758640	6363544	2453712	1847793	73585.9	126504	107121	65323.5	59870.3	2266228	2384244	2657470	2267958	159471	2393975	0.0666134		2.97561e+06	3606176	1.21191	0.821019
48	Flavin mononucleotide (FMN)	C00061	Nucleotides	455.102	455.102	0.695489	-	0	0	0	0	157119	246736	241427	304680	2300.75	1878.48	1994.82	2218.37	0	150852	121275	143773	99921.2	20006.2	128955	0.155141		0	244082	#DIV/0!	0.00023122
49	NAD+	C00003	Nucleotides	664.116	664.116	0.845767	+	91428.3	233902	37231.2	42476.6	17363.1	66237.4	56788	32643	2998.41	2832.01	919.76	0	0	38954.8	37511.8	36475.8	39167.4	1099.18	38027.5	0.0289048		66952.5	44715.5	0.667869	0.265182
50	Phosphate (orthophosphate)	C00009	Phosphates	98.9848	98.9848	0.733143	+	3309687	3929295	3004695	3421089	3323915	3346308	2916851	3722295	30210.3	7410.75	9294.89	6884.07	3169	1594691	1936163	2002329	2051768	178864	1.89624e+06	0.0943258		3365388	3.33511e+06	0.991004	0.737572
51	Diphosphate	C00013	Phosphates	176.935	176.935	0.617517	-	1744292	2127175	765502	1875863	1339174	1729749	1605582	1110724	2427.49	10812	361.465	451.926	0	161334	201142	232525	260472	36884.3	213868	0.172463		1.81008e+06	1472378	0.813434	0.600172
52	D-Glucose (GLUC)	C00031	Glycolysis	179.056	179.056	0.675763	-	158609	331647	353221	435071	247759	397615	428973	524329	95525.1	82792.2	67709.6	93183.1	7667.82	597161	574869	505700	602084	38487.9	569954	0.0675281		342434	413294	1.20693	0.364867		1.65186	GLUC
53	D-Glucose 6-phosphate (G6P)	C00092	Glycolysis	259.022	259.022	0.622109	-	47335.7	18697	4483.38	4271.84	76723	34008.1	9916.33	15385	1009.43	445.025	568.397	944.082	0	17508.7	18563.5	16803.9	17132.4	661.604	17502.1	0.0378013		11590.2	24696.5	2.13082	0.432834		63.2171	G6P
54	D-Fructose bisphosphate (FBP)	C00354	Glycolysis	338.995	338.995	0.680753	-	5163.19	4111.85	5790.09	5587.63	2418.41	4070.39	4854.58	6100.77	0	0	0	0	0	10274.3	9300.32	9391.73	8673.68	570.415	9410	0.060618		5375.41	4462.49	0.830166	0.385237		14.3969	FBP
55	D-Glyceraldehyde 3-phosphate (GAP)	C00118	Glycolysis	168.988	168.988	1.7775	-	26925000	21400000	23900000	23300000	24400000	40000000	2.99e+07	31600000	11000000	13800000	11300000	9812577	164184	29100000	26500000	30300000	30600000	1.61613e+06	29125000	0.0554894		23600000	30750000	1.30297	0.0686284		0.0354162	GAP
56	Phosphoglycerate (PG)	C00631	Glycolysis	184.984	184.984	1.77632	-	60468.5	34386.3	39003	37861.6	42707.6	68506	45494	40986.9	9915.08	11680.2	15060.3	12996	0	53619.7	41473.2	42983.6	41521.2	5071.11	44899.4	0.112944		38432.3	44100.8	1.14749	0.485756		130.093	PG
57	Pyruvate (PYR)	C00022	Glycolysis	87.0073	87.0073	0.674604	-	146496	205110	252386	281916	201567	241375	383406	340186	222771	138962	80558.9	93077.8	80320.3	235407	222266	222286	242514	8712.54	230618	0.037779		228748	290781	1.27118	0.222601		3.20849	PYR
58	Lactate (LAC)	C01432	Glycolysis	89.0229	89.0229	0.802733	-	3830989	4846550	3360987	3157683	2953124	5533578	4132279	3971756	1488687	1217246	1085078	1367689	98112.6	3269970	4680638	3973264	4427384	535896	4087814	0.131096		3595988	4.05202e+06	1.12682	0.611361		1.28796	LAC
59	Maltose (MALT)	C00208	Other sugars	341.109	341.109	0.695057	-	552.334	951.99	976.931	1031.76	25139.7	43330.2	44465.4	46960.8	4064.82	705.626	831.275	4911.31	352.357	24932.9	14108.9	17638.7	18320.8	3911.14	18750.3	0.20859		964.461	43897.8	45.5154	0.000231907		52.8987	MALT
60	Mannitol	C00392	Other sugars	183.085	183.085	0.924504	+	676997	1468969	649968	1067552	806995	1414068	1096103	748916	18644.5	9874.9	12303.1	2357.97	5278.48	1034895	1043027	1006064	957782	33361.8	1.01044e+06	0.033017		872275	951549	1.09088	0.843727
61	D-Ribose	C00121	Other sugars	151.062	151.062	0.898174	+	341966	974286	212852	361287	297528	660762	376868	291630	6085.45	10517.9	11401.7	3908.6	3663	492714	435069	509588	407546	41521.5	461230	0.0900234		351626	337198	0.958966	0.742248
62	D-Rhamnose	C01684	Other sugars	165.076	165.076	1.84287	+	150238	136535	150054	141121	118972	172476	163739	171072	19337.7	8544.41	9279.95	12468.2	2225.35	113368	72569.6	90675.3	108048	16000.1	96165.1	0.166382		145588	167406	1.14986	0.392924
63	Citrate	C00158	TCA cycle	191.02	191.02	0.631592	-	96196.2	227566	68922.1	86186.3	64436.1	150690	82924.6	74472.1	3189.87	4416.16	1508.71	1530.08	4594.51	14736.9	25150.8	31520.6	27219.3	6171.04	24656.9	0.250276		91191.2	78698.3	0.863003	0.543637
64	2-Oxoglutarate (2-OG) (also alpha-ketoglutarate)	C00026	TCA cycle	145.015	145.015	0.661348	-	45171.7	45735.6	41021.2	62492	54908.9	65669.8	51708.6	70895.6	12084.8	5649.24	3656.27	3305.99	577.822	29328	32794.3	27527.3	35532.2	3092.99	31295.5	0.098832		45453.7	60289.4	1.32639	0.111636		3.74538	aKG
65	2-Oxoglutaramate	C00940	TCA cycle	146.043	146.043	0.90105	+	58281.4	73239.1	122214	158945	61137.7	104486	111401	111145	10377.2	1920.34	2403.36	2645.34	0	136118	106504	197611	223198	46645.9	165858	0.281241		97726.7	107816	1.10324	0.821763
66	Succinate	C00042	TCA cycle	117.018	117.018	0.798604	-	269593	276150	272432	271764	191076	422486	374891	336844	101151	76784.9	89052.9	98945.3	6111.96	293008	403825	416451	415919	51799.8	382301	0.135495		272098	355867	1.30786	0.283345
67	Fumarate	C00122	TCA cycle	115.003	115.003	0.804287	-	24370.6	34088	33964.6	20948.4	20943.5	44321	38034.5	30460.9	10809.6	8844.53	10560.8	10495.6	2745.52	37887.7	45687	47621.5	48581.6	4205.51	44944.5	0.0935712		29167.6	34247.7	1.17417	0.431996
68	Malate	C00711	TCA cycle	133.014	133.014	0.630104	-	137484	250827	213060	248607	86561.9	253950	319191	221621	6361.23	3488.4	3353.14	3366.14	1177.24	37549.2	45501.1	58924.4	46115.2	7657.28	47022.5	0.162843		230834	237786	1.03012	0.892677
69	Oxaloacetate	C00036	TCA cycle	131	131	0.654958	-	243586	298979	304419	380372	359389	428087	412884	393423	8923.92	8635.38	11209.5	12635.9	3611.51	124888	124900	147742	173828	20176.7	142839	0.141255		301699	403153	1.33628	0.0279379
70	D-Glucono-1-5-lactone 6-phosphate (GDL)	C01236	Pentose Phosphate Pathway	259.027	259.027	0.664257	+	4170.86	11064.5	16342.6	9924.25	2837.25	15156.6	7028.34	16815.8	1626.41	583.832	756.967	0	0	31207	38284.3	28968.8	30572.9	3573.5	32258.2	0.110778		10494.4	11092.5	1.057	0.984531		2.68096	GDL
71	Sedoheptulose phosphate (SP)	C06222	Pentose Phosphate Pathway	289.033	289.033	0.624342	-	139826	69844	33487.7	36218.7	104528	108503	43166.6	36443.2	0	434.872	0	0	0	4075.54	4881.93	5259.05	3261.79	769.304	4369.58	0.176059		53031.3	73847.3	1.39252	0.919328		28.6515	SP
72	Pentose phosphates (isobars) (RP)	C00199	Pentose Phosphate Pathway	229.012	229.012	0.63544	-	139826	425740	33487.7	36218.7	104528	249875	43166.6	36443.2	894.618	491.483	0	0	0	46249.6	63090.4	61872.3	55878.9	6660.6	56772.8	0.11732		88022.1	73847.3	0.838963	0.648172		25.2474	RP
73	cis-Aconitate	C00417	C5-Branched Dibasic Acid Metabolism	173.007	173.007	0.786637	-	15798.4	16876.4	36967.6	22301	24722.2	26160.7	48992.1	40255.9	5405.15	1811.04	3105.45	3256.22	1625.62	25874.2	18044.3	17092.3	26383.4	4297.24	21848.5	0.196683		19588.7	33208.3	1.69528	0.163772
74	Itaconate	C00490	C5-Branched Dibasic Acid Metabolism	129.018	129.018	0.878492	-	5680.61	9296	9638.63	9819.98	4286.46	7726.19	11479.6	9010.62	7373.43	6423.85	7458.3	7349.61	3175.79	13026.4	11106.1	12213.5	13457.2	895.642	12450.8	0.0719345		9467.32	8368.4	0.883926	0.796432
75	2-Hydroxyglutarate	C02630	C5-Branched Dibasic Acid Metabolism	147.03	147.03	0.780321	-	22467.2	37135.9	33887.1	28657.6	29225.7	53780.8	42438.7	34511.2	25991.4	12636.2	7066.29	9061.32	4251.83	18749.2	21474.5	25970.9	22363.7	2581.97	22139.6	0.116622		31272.4	38474.9	1.23032	0.179904		16.1528	2HG
76	2-Methyleneglutarate	C02930	C5-Branched Dibasic Acid Metabolism	145.05	145.05	0.690597	+	17094.6	14455	15808	19426.6	78743.4	139227	110888	179034	22956.7	42302.9	18209.1	9152.52	0	74871	95044.3	77883.2	87675.6	8002.68	83868.5	0.0954193		16451.3	125058	7.6017	0.00207349
77	Glutathione (GSH)	C00051	GSH homeostasis	308.091	308.091	0.89415	+	5541618	4.17584e+06	535374	326385	3220848	4627782	542906	270152	822.172	6912.6	783.476	2203.16	0	80119.5	65432.8	94279.9	61688	12904.3	75380.1	0.17119		2.35561e+06	1.88188e+06	0.798892	0.785259		0.469777	GSH
78	Glutathione disulfide	C00127	GSH homeostasis	613.159	613.159	0.894419	+	310902	334116	52701.2	102796	431972	498447	90850.5	89476.2	8554.88	23333.7	10718	0	0	175188	185051	211565	111589	36708.5	170848	0.214861		206849	261411	1.26378	0.573958
79	5-Oxoproline	C01879	GSH homeostasis	130.05	130.05	0.906065	+	4330712	6206826	7938926	12100000	4084850	7995150	10400000	8690187	444042	468636	286137	245040	6038.11	14000000	11400000	16200000	14100000	1.70202e+06	13925000	0.122228		7072876	8.34267e+06	1.17953	0.946677		0.74184	5-OX
80	S-Glutathionyl-L-cysteine	C05526	GSH homeostasis	425.081	425.081	0.6308	-	20199.9	32023	14604.4	25018.8	24578.5	60522.7	17374	16718.4	0	0	0	0	0	38619.5	35099.3	45784.9	45648.4	4600.45	41288	0.111423		22609.4	20976.3	0.92777	0.558222		0.367122	GS-CYS
81	Cys-Gly	C01419	GSH homeostasis	177.04	177.04	0.681992	-	12400.5	19739.5	23290.5	21443.4	14851.1	24838.2	28002.3	35762.9	9903.08	5796.39	5065.62	4342.78	3496.87	32365.6	22304.7	26755.6	18215.5	5258.24	24910.3	0.211087		20591.5	26420.2	1.28307	0.22742
82	Ascorbate	C00072	GSH homeostasis	175.025	175.025	0.798846	-	28497.5	16387	82943.2	64932.3	27234	69626.1	119706	96259.6	2854.39	2839.79	862.63	823.79	230.841	16102	18422.1	17723.1	27022.6	4244.16	19817.4	0.214163		46714.9	82942.8	1.77551	0.278205
83	gamma-L-Glutamyl-D-alanine	C03738	Gamma-glutamyls	219.098	219.098	0.721995	+	13107.9	20756.8	5070.19	2542.89	13305.7	12738.3	6106.94	7572.78	0	1376.39	1277.97	0	0	7929.18	8074.62	5311.32	6664.68	1116.04	6994.95	0.159549		9089.06	10155.6	1.11734	0.925726
84	gamma-Glutamyl-gamma-aminobutyrate	C15767	Gamma-glutamyls	233.113	233.113	0.86275	+	18999	68374.5	707.658	1183.08	2898.86	12765.4	1498.89	2179.06	0	1943.81	893.806	518.74	685.213	7274.89	7241.33	8569.21	8484.01	635.073	7892.36	0.0804669		10091.1	2538.96	0.251605	0.320713
85	gamma-L-Glutamylputrescine	C15699	Gamma-glutamyls	216.132	216.132	1.81281	-	17711.8	14140.2	24890.1	16314	16594.7	18511.2	23099.6	18785.3	10997.4	0	18743.2	14331.1	0	17058.6	17768.8	18644.4	18349.7	606.059	17955.4	0.0337536		17012.9	18648.2	1.09612	0.728363
86	5-L-Glutamyl-taurine	C05844	Gamma-glutamyls	255.06	255.06	0.657836	+	6244.93	18511.6	2745.83	2374.89	2292.76	14381.9	4086.71	2104.15	800.766	558.32	0	1680.24	4336.26	10171	13431.7	7656	11467	2097.31	10681.4	0.196351		4495.38	3189.74	0.709559	0.726427
87	D-O-Phosphoserine	C02532	Serine biosynthesis and one-carbon metabolism	184.001	184.001	1.80835	-	11572.7	10606.4	14361.8	10097.1	12430.1	11057.1	14559.9	12436.6	16000.3	6831.46	8826.49	13284.8	0	14330.3	13529.5	11730	13824.6	980.153	13353.6	0.0733999		11089.5	12433.3	1.12118	0.451769
88	3-Phosphonooxypyruvate	C03232	Serine biosynthesis and one-carbon metabolism	184.986	184.986	3.80715	+	2056837	1709077	1823092	2139742	2204401	2139461	2158996	2203497	2190758	307237	1498904	2340742	208769	1923695	1811549	2002170	1833399	75905.3	1.8927e+06	0.0401042		1.93996e+06	2.18125e+06	1.12437	0.0526232
89	S-Adenosyl-L-homocysteine (SAH)	C00021	Serine biosynthesis and one-carbon metabolism	385.135	385.136	0.9182	+	7022.57	19207.7	6043.49	10511.4	7350.66	12704.8	9946.94	6706.37	0	0	0	0	0	9817.86	7973.01	6711.98	5507.9	1595.75	7502.69	0.21269		8766.99	8648.8	0.986518	0.660796
90	S-Adenosyl-L-methionine (SAM)	C00019	Serine biosynthesis and one-carbon metabolism	399.13	399.13	1.75669	+	48040.6	3239.95	108637	196766	28715.9	18578.9	83387.8	194984	24844.8	6345.9	28833	9262.34	1560.39	77113.7	74569.2	99985.1	65060	12823.4	79182	0.161948		78338.9	56051.9	0.715504	0.898379
91	Folate	C00504	Folate pool (One carbon metabolism)	442.147	442.147	1.73193	+	28810.4	28564.8	43945.5	55671	26588.8	39110.2	61149.4	59380.8	0	0	0	0	0	59143.5	58401.7	68630.7	43564.9	8966.31	57435.2	0.156112		36377.9	49245.5	1.35372	0.515952
92	Ornithine	C01602	Urea cycle	133.097	133.097	0.610217	+	33369.8	34718.3	45156.3	40612.1	30954.6	50042.4	78317.2	52254.3	111606	58610	90883.9	24937.2	12674.9	71722.8	66503.5	81147.5	71216.7	5312.73	72647.6	0.0731301		37665.2	51148.3	1.35797	0.203303		1.36124	ORN
93	L-Citrulline	C00327	Urea cycle	176.103	176.103	0.678965	+	21774.6	8600.16	17979	9714.38	6072.1	15267	14376.3	18783.2	208265	86535.3	181659	2639.73	5095.38	25258.8	34468.2	29389.6	32614	3496.45	30432.7	0.114891		13846.7	14821.6	1.07041	0.838006
94	Putrescine	C00134	Polyamines	89.1081	89.1081	0.615422	+	130123	207638	21144.4	21205.4	107838	194819	13697.6	14365.6	3952.35	2060.5	10952.7	5730.5	4829.5	67262.9	68415.8	50682.8	54051.4	7837.86	60103.2	0.130407		75664.4	61101.8	0.807538	0.850816
95	Spermidine	C00315	Polyamines	146.165	146.165	0.610283	+	1661410	2690814	511040	898033	865359	1193264	517783	339874	1992.09	4013.52	1456.56	915.814	5702.24	248594	287097	206518	193739	36771.3	233987	0.157151		1.27972e+06	691571	0.540407	0.217609		3.27393	SPMD
96	Spermine	C00750	Polyamines	203.223	203.223	0.59346	+	147704	155118	171090	134264	81417.7	129851	90230.1	48969.6	0	731.314	0	0	726.438	26993.2	40532.6	30607.1	32027.6	4966.04	32540.1	0.152613		151411	85823.9	0.566829	0.0125832
97	N-Acetylneuraminate	C00270	Aminosugars	308.099	308.099	0.641086	-	135921	262614	104619	103867	147819	158126	84200.1	90688.2	445.416	1502.68	0	1202.46	0	114889	107476	139493	146432	16290.3	127073	0.128197		120270	119254	0.99155	0.483511
98	N-Glycoloyl-neuraminate	C03410	Aminosugars	324.094	324.094	0.637688	-	15978.8	24402.5	9115.56	10095.6	13655.2	18598.4	6937.42	9367.76	630.389	0	0	0	0	5320.93	6500.78	8703.23	8618.55	1437.21	7285.88	0.19726		13037.2	11511.5	0.882968	0.549132
99	D-Glucosamine	C00329	Aminosugars	180.087	180.087	0.706357	+	3473.35	3620.58	7687.3	10545.7	5746.11	7319.69	6906.53	10864.2	51391.3	85396.1	39424.7	32402.2	1552.88	33177.8	30021.5	33720.9	24685.7	3589.61	30401.5	0.118074		5653.94	7113.11	1.25808	0.523822
100	Glycolate	C00160	Aminosugars	75.0072	75.0072	0.790668	-	775404	604767	863130	698830	979494	847356	934518	799023	1232561	834835	764065	666510	88142.2	807234	740056	786536	1072804	129976	851657	0.152615		737117	890937	1.20868	0.0650397
101	Homocarnosine	C00884	Arginine and proline metabolism	239.113	239.113	2.05316	-	8824.34	12069.5	19662.9	12327.6	4992.02	43351.8	28428	26373.5	1458.54	0	2718.82	903.333	0	1015.13	0	5494.71	2614.02	2076.31	2280.97	0.910276		12198.6	27400.7	2.24622	0.177317
102	Asymmetric dimethyl arginine	C03626	Arginine and proline metabolism	203.15	203.15	0.68477	+	40061.7	71655.1	10444.2	18074.3	36856.8	59273.7	31058.5	47422.7	2646.7	2586.92	4566.53	1354.81	4803.29	49027.7	59267.1	48193.7	48510.8	4638.34	51249.8	0.0905046		29068	42139.7	1.4497	0.588952
103	5-Guanidino-2-oxopentanoate	C03771	Arginine and proline metabolism	174.088	174.088	0.748896	+	11681.7	11449.3	13008.6	13275.2	12260.3	14678.2	14530.3	21709.2	10308.5	16402.7	12201.1	4755.49	7054.37	20812	15928.6	21428.7	20996.1	2241.39	19791.4	0.113251		12345.2	14604.3	1.18299	0.152259
104	Phosphocreatine	C02305	Arginine and proline metabolism	210.028	210.028	0.62184	+,-	176674	316746	26002	30276.1	201300	205241	31082.8	38577.5	3741	1489.71	4088.75	2632.61	487.448	51204	53913.3	59673	50260.6	3666.27	53762.7	0.0681935		103475	119939	1.15911	0.835366
105	Creatine	C00300	Arginine and proline metabolism	132.077	132.077	0.705322	+	10400000	15400000	1512632	3018661	11200000	10900000	4118258	4797464	4010260	1494012	4524346	3128972	13074.3	5817926	5888370	5847838	5117786	318637	5667980	0.056217		6.70933e+06	7848732	1.16982	0.965262
106	Creatinine	C00791	Arginine and proline metabolism	114.067	114.067	0.688152	+	130157	141479	108215	240020	113227	109306	239497	343546	100272	63533.6	121704	89332.9	37255.8	205645	237467	231125	210139	13484.9	221094	0.0609917		135818	176362	1.29852	0.491149
107	4-Acetamidobutanoate	C02946	Arginine and proline metabolism	144.065	144.065	0.96504	-	9356.33	15638.3	9060.77	13785.2	8224.01	15154.4	17211.8	14037.6	5696.85	4865.03	4212.55	3928.41	7411.72	14421.5	12050.5	15428.1	14942.4	1296.96	14210.6	0.0912671		11570.8	14596	1.26145	0.526807
108	N-Acetylornithine	C00437	Arginine and proline metabolism	175.108	175.108	0.892204	+	621902	1786903	31773	34870.2	73877.9	179454	26999	26883.4	5917.09	15585.8	11876.5	12795.5	0	220703	228622	257732	209218	17929.4	229069	0.0782707		328386	50438.4	0.153595	0.239218
109	trans-4-Hydroxy-L-proline	C01157	Arginine and proline metabolism	130.05	130.05	0.795432	-	28846.9	57059.8	17591.6	12015	24247	44623.3	20220.2	16542	14089	13501.4	10927.7	7573.85	2589.64	16069.6	16449.8	16561.7	23678.4	3174.03	18189.9	0.174494		23219.3	22233.6	0.957548	0.841443
110	N-Succinyl-L-glutamate 5-semialdehyde	C05932	Arginine and proline metabolism	230.066	230.066	0.916613	-	1319.82	3607.99	2010.32	3616.68	1338.61	4326.76	4244.2	3377.11	759.685	0	0	0	0	3843.34	3059.12	4098.38	5190.29	762.748	4047.78	0.188436		2809.15	3810.66	1.35651	0.478991
111	Pantothenate	C00864	Panthothenate metabolism	220.118	220.118	1.69629	+	548968	765340	783727	1037553	662382	974694	922683	891309	9828.22	95190.6	14559.9	17060.7	1269	950983	969906	1176526	1085889	91442.1	1.04583e+06	0.0874353		774533	906996	1.17102	0.540084
112	Taurine	C00245	Sulfur metabolism	126.022	126.022	0.683956	+	941859	1588512	241367	219972	902355	1318934	245339	277333	433822	287108	407472	361961	1521.88	533799	662251	660470	642271	53059.8	624698	0.0849367		591613	589844	0.99701	0.88683
113	Hypotaurine	C00519	Sulfur metabolism	110.028	110.028	0.671859	+	5789.81	10083.8	1486.3	1521.52	7224.94	5222.28	1842.58	4763.26	0	0	0	0	0	9103.54	4636.9	5951.35	8092.07	1752.84	6945.96	0.252354		3655.67	4992.77	1.36576	0.985931
114	Mercaptopyruvate	C00957	Sulfur metabolism	118.982	118.982	0.654888	-	13371.4	18250	7975.08	27688.2	13729.9	21787.5	12237	18178.7	733	1597.58	1525.06	1200.58	1242.83	3586.82	1597.8	1686.72	4862.6	1368.1	2933.48	0.466374		15810.7	15954.3	1.00908	0.945214
115	L-Selenomethionine	C05335	Sulfur metabolism	198.007	198.006	1.00173	+	0	0	0	0	0	0	0	0	0	1082.24	0	0	5266.79	0	0	0	22940.9	9933.68	5735.22	1.73205		0	0	#DIV/0!	#DIV/0!
116	3-Sulfocatechol	C06336	Sulfur metabolism	188.986	188.986	1.49898	-	304.052	420.916	309.662	1118.91	425.214	1480.9	1542.47	962.376	0	0	0	0	0	374.607	335.11	980.008	1033.13	326.695	680.715	0.47993		365.289	1221.64	3.34431	0.133869
117	L-Cysteate	C00506	Sulfur metabolism	167.996	167.996	0.639276	-	3047.05	3855.2	2071.67	5859.89	2597.54	8487.65	1988.8	2790.62	1203.29	0	0	380.359	0	3202.45	1997.5	5342.4	9150.42	2718.73	4923.19	0.552228		3451.12	2694.08	0.780639	0.88561
118	L-Methionine S-oxide	C02989	Sulfur metabolism	166.054	166.053	0.898895	+	23545.8	45034.7	38406	41306.8	43665.9	47760.8	52164.3	40605.9	0	0	0	0	4131.6	38439.3	32116.8	60571.5	49575.4	10866.3	45175.8	0.240533		39856.4	45713.4	1.14695	0.14355
119	3-Methyleneoxindole	C02796	Indole and Tryptophan	146.06	146.06	1.75179	+	36642.2	57143.6	62780.1	62761.1	40127.2	67945.3	63300.6	52602.3	41219.6	21753	26680.7	19616.1	692.222	63877.6	72740.9	68553.3	51450.5	7977.23	64155.6	0.124342		59952.3	57951.4	0.966625	0.898848
120	Indole	C00463	Indole and Tryptophan	118.065	118.065	1.73073	+	9858.22	22831.7	13207.7	18106.6	19330.5	24107.2	16578.6	18062.3	3749.47	3215.62	7287.85	1704.32	1666.31	22687.2	23635.9	19178.4	16873.1	2714.94	20593.7	0.131834		15657.1	18696.4	1.19411	0.323561
121	Indole-3-acetaldehyde	C00637	Indole and Tryptophan	160.076	160.076	1.27097	+	48540.5	54825.1	86134.8	126344	53944.7	79388.2	219373	151814	652.919	517.106	519.463	884.208	0	40804.5	50376.9	48471	57866.8	6070.13	49379.8	0.122927		70479.9	115601	1.6402	0.297848
122	Indole-3-acetate	C00954	Indole and Tryptophan	176.071	176.071	1.95278	+	4068.05	4506.23	234500	485900	3835.28	4891.22	416308	296083	0	0	0	0	0	192813	196433	233893	181410	19707.3	201137	0.0979796		119503	150487	1.25927	0.990316
123	Indolepyruvate	C00331	Indole and Tryptophan	204.063	204.063	0.920871	+	214841	432518	170167	347272	230531	306800	336748	210446	3291.09	2830.99	3444.52	0	0	270786	265224	234291	237686	16173.4	251997	0.0641808		281057	268665	0.955911	0.775915
124	Indoxyl	C05658	Indole and Tryptophan	134.06	134.06	0.884948	+	8107.58	10137.8	8072.92	14012.5	8326.96	11307	13353.2	11814.5	899.495	4788.27	3314.38	3483.6	2420.3	16930	13790.7	17285.2	10468.9	2754.95	14618.7	0.188453		9122.67	11560.8	1.26726	0.546163
125	6-Hydroxykynurenic acid	C08480	Indole and Tryptophan	206.048	206.048	0.8967	+	36792.1	68344.6	5507.39	2768.41	60243.7	54275.7	2878.48	39132.6	0	0	0	0	0	20602.7	21043.3	19821.7	19598.2	583.288	20266.5	0.0287809		21149.7	46704.2	2.20826	0.610623
126	L-Kynurenine	C00328	Indole and Tryptophan	209.092	209.092	1.4359	+	19762.3	24752.4	18567.1	27450.9	15210.6	33962.6	40973.3	25262.2	3048.61	1910.53	1000.11	0	0	22937.3	20269.9	26533.6	34513.3	5360.98	26063.5	0.205689		22257.3	29612.4	1.33045	0.336021
127	Quinolinic acid (pyridine-2,3-dicarboxylate)	C03722	Indole and Tryptophan	166.014	166.014	3.80738	-	25686.3	41534.7	17938.7	20945.8	21804.3	22243.5	18571.3	18688.9	13061.1	2125.58	12182.7	13168.3	1269.33	12964.9	12694	17667.4	15599.6	2039.92	14731.5	0.138473		23316	20246.6	0.868354	0.289944
128	N-formyl kynurenine (L-Formylkynurenine)	C02700	Indole and Tryptophan	237.087	237.087	1.05903	+	9171.52	12064.4	10231.4	21076	9325.14	11164.5	16019.3	12983	0	0	0	0	0	10438.3	16890	14692.3	15079.1	2365.32	14274.9	0.165697		11147.9	12073.8	1.08305	0.811773
129	Anthranilate	C00108	Indole and Tryptophan	138.055	138.055	1.87054	+	20197.5	23811.2	27574	24724.9	25154.7	21081.4	28460.6	21269.6	24540.4	21949.4	27563	24332.4	1597.15	22027.1	29918.9	18864.7	31843.9	5379.43	25663.6	0.209613		24268	23212.1	0.956489	0.971936
130	Picolinic acid	C10164	Indole and Tryptophan	124.039	124.039	0.611577	+	93863.4	92009.5	82284.7	108184	81176.4	98509.9	102990	86081.3	45190.4	76370.6	81774.4	0	5988.98	106289	114384	79843	78740.6	15788.9	94814.2	0.166524		92936.4	92295.6	0.993104	0.806429
131	g-Oxalo-crotonate ((Z)-5-Oxohex-2-enedioate)	C03453	Indole and Tryptophan	159.028	159.028	0.899405	+	249855	356595	213849	334192	368616	374515	319204	214032	5282.46	1955.05	4718.5	394.163	0	305643	264911	276362	273032	15387.1	279987	0.0549564		292023	343910	1.17768	0.566827
132	2-Aminomuconate	C02220	Indole and Tryptophan	158.045	158.045	0.894518	+	20959.7	44345.6	10092.8	11470	17523.1	21744.8	15280.3	9578.15	640.685	1411.78	1376.47	483.8	0	14391.1	14986.1	15761.2	13687.4	762.995	14706.4	0.0518817		16214.8	16401.7	1.01152	0.519686
133	8-Methoxykynurenate	C05830	Indole and Tryptophan	220.064	220.064	1.42001	+	3848.95	32961.6	670.9	15987.8	23214.9	73264.7	21574.8	12571.2	0	0	768.422	0	0	20579.2	19200.5	15005.5	15605.3	2353.06	17597.7	0.133714		9918.36	22394.8	2.25792	0.261507
134	Phenylpyruvate	C00166	Phenylalanine, tyrosine and tryptophan biosynthesis	165.055	165.055	0.914474	+	528701	1263189	559673	867754	645523	1025184	915366	624071	16979.5	14262.5	13465.2	1842.84	1085.7	825236	870743	821153	846703	19745.5	840959	0.0234798		713714	780445	1.0935	0.991123
135	Shikimate 3-phosphate	C03175	Phenylalanine, tyrosine and tryptophan biosynthesis	255.029	255.029	0.905087	+	63698.4	59987.6	89689.2	117442	58767.8	74294.1	114578	72884.4	16149.8	7566.24	16145.1	703.426	0	119374	123413	153730	124977	13639	130374	0.104615		76693.8	73589.2	0.95952	0.890652
136	L-Adrenaline	C00788	Signaling	184.097	184.097	1.05646	+	4122.74	1754.22	6117.15	6863.2	5338.31	6019.16	3879.11	2124.4	3735.59	9245.68	8961.21	5614.15	4983.16	7254.74	9118.58	4543.12	6066.91	1673.45	6745.84	0.248072		5119.95	4608.71	0.900147	0.802758
137	Dopamine	C03758	Signaling	152.071	152.071	1.33958	-	3006.42	5203.85	2239.97	4022.41	2834.54	4843.99	3544.16	3059.5	0	315.969	375.101	0	693.401	3331.31	2934.32	3884.14	3901.31	405.095	3512.77	0.115321		3514.41	3301.83	0.939511	0.953549
138	Serotonin	C00780	Signaling	177.102	177.102	1.16428	+	14110.4	20162.4	2347.14	4755.12	17805.9	19517.6	5038.53	3321.97	0	2413.08	0	704.595	0	6815.17	7870.73	7990.03	8020.03	498.975	7673.99	0.0650215		9432.77	11422.2	1.21091	0.861253
139	1D-myo-Inositol 1-4-bisphosphate	C01220	Inositol	341.011	341.011	1.91052	+	40354.8	30399	25534.3	31350.3	23297.2	18021.7	25535.1	27172.2	3230.64	0	9993.14	2421.45	0	21682.6	25941.7	20484.4	17286.1	3100.77	21348.7	0.145244		30874.7	24416.1	0.790813	0.0623421
140	(sn-)Glycerol 3-phosphate	C00093	Glycerophospholipid biosynthesis	171.006	171.006	0.627005	-	39874.3	96984	2791.78	5233.65	29715.6	59545.1	12823.2	11679.8	0	258.101	0	0	0	19285.4	22379.3	23659.3	28219.2	3211.82	23385.8	0.137341		22554	21269.4	0.943046	0.762758
141	Sphingosine	C00319	Glycerophospholipid biosynthesis	300.279	300.279	1.80543	+	19900000	19700000	17600000	19200000	20100000	16400000	16000000	25900000	3102120	1275964	2516016	1209293	10946.2	19300000	22800000	16800000	18000000	2.24541e+06	19225000	0.116796		19450000	18250000	0.938303	0.83871
142	Sphinganine 1-phosphate	C01120	Sphingolipid biosynthesis	380.255	380.256	3.71722	-	27337	61099.5	25260.1	21722.3	36186.8	44864.6	89767.2	22649.7	16816.2	0	2376.35	7517.37	0	20317.5	30203.5	45368.2	38000.6	9297.2	33472.5	0.277757		26298.5	40525.7	1.54099	0.430652
143	sn-glycero-3-Phosphoethanolamine	C01233	Glycerophospholipid biosynthesis	214.047	214.047	0.643479	-	10660	20976.9	6082.07	1662.65	15647.2	16119.1	4577.53	3558.2	0	3556.85	2889.16	4038.41	1117.05	18637.5	18697.8	18656.9	22076.5	1477.79	19517.2	0.0757176		8371.06	10112.4	1.20802	0.981454
144	Acetylcholine	C01996	Glycerophospholipid biosynthesis	146.118	146.118	0.725948	+	790219	1090822	98565.8	166525	806131	670446	136330	138234	26968.5	35853.2	37068	28791.4	8834.9	302169	290272	288348	297401	5543.95	294547	0.0188219		478372	404340	0.845242	0.7522
145	Choline	C00114	Glycerophospholipid biosynthesis	104.108	104.108	0.676887	+	2336735	4089747	1549775	2322956	2020812	4322892	2100126	2153063	114199	52093.6	95572.5	87026.6	5563.67	3148946	3000613	2819952	3322899	185399	3.0731e+06	0.0603294		2.32985e+06	2.12659e+06	0.912762	0.926638
146	Acylglycerone phosphate	C03372	Glycerophospholipid biosynthesis	195.976	195.976	0.650417	-	362362	323815	526841	555674	504604	489914	381386	527006	4494.25	3595.36	0	2868.19	0	806283	570773	784524	812250	100232	743457	0.134819		444601	497259	1.11844	0.631617
147	Triacylglycerol (triglyceride)	C00422	Glycerolipid metabolism	174.014	174.014	0.90571	+	43874.8	26369	46690.6	77815	32289.8	39098.8	66790.4	37695.9	3976.18	2764.05	7710.26	0	0	37076.2	41881.8	43452.7	45481.3	3101.8	41973	0.0739		45282.7	38397.4	0.847948	0.733165
148	Glycerone phosphate	C00111	Glycerolipid metabolism	168.988	168.988	1.7775	-	39100000	21400000	23900000	23300000	24400000	40000000	29900000	31600000	11000000	13800000	11300000	9812577	164184	29100000	26500000	30300000	30600000	1.61613e+06	29125000	0.0554894		23600000	30750000	1.30297	0.416436
149	3-D-Glucosyl-1,2-diacylglycerol	C04046	Glycerolipid metabolism	307.065	307.065	2.02787	-	13673	31382.1	15794	50033.1	38561.6	37295.5	33911.3	34319.8	1149.02	37891.6	0	0	0	11572.3	8072.23	20032.5	17986.2	4812.03	14415.8	0.333802		23588	35807.6	1.51804	0.36627
150	L-Carnitine	C00318	Carnitine and fatty acid metabolism	162.113	162.113	0.6866	+	1005386	1736625	280845	441040	1027586	1402471	517322	490176	182508	127914	189031	6929.6	14272.1	851332	1081696	983106	1124880	105162	1.01025e+06	0.104095		723213	772454	1.06809	0.987255
151	Acetyl-carnitine (acyl-C2)	C02571	Carnitine and fatty acid metabolism	205.127	205.127	0.889674	+	346299	306146	60179.1	86402.8	296045	279137	93200.6	76452.2	17809.4	18530.5	20187.1	2857.37	2943.8	112002	107688	112451	102472	4024.07	108653	0.0370359		196275	186169	0.948513	0.890368
152	Propionyl-carnitine (acyl-C3)	C03017	Carnitine and fatty acid metabolism	218.139	218.139	1.06151	+	154135	337224	139356	147907	149808	179291	202122	104998	21147	57710.1	28529.3	17850.1	0	135173	172849	188603	136422	23148.9	158262	0.14627		151021	164549	1.08958	0.51935
153	Butanoyl-L-carnitine (acyl-C4)	C02862	Carnitine and fatty acid metabolism	232.155	232.155	1.71665	+	40387.1	55079.1	39536.6	63228.3	51337.4	43362.3	67362.9	76479.6	26987.6	451563	34078.2	15523.8	4842.14	67018.9	74712.4	66172.1	54432.7	7247.14	65584	0.110502		47733.1	59350.2	1.24338	0.328773
154	Hydroxybutyrlcarnitine (acyl-C4-OH)	HMDB13127	Carnitine and fatty acid metabolism	248.149	248.149	0.903096	+	32549.5	29348.6	10210.2	12674.6	45638	38079.6	18587.9	13334.9	2641.09	17997	5578.8	4138.13	7161.56	10605.8	15221.9	13907.3	8368.04	2699.56	12025.7	0.224482		21011.6	28333.7	1.34848	0.45147
155	C4-dicarboxylcarnitine (acyl-C4-DC)	HMDB13133	Carnitine and fatty acid metabolism	262.129	262.129	0.899291	+	5875.07	6217.22	1870.31	2124.53	952.142	3002.39	5560.11	3441.53	4508.11	6649.84	5798.28	2308.16	1017.06	5554.21	4763.2	6030.88	3566.41	932.642	4978.67	0.187327		3999.8	3221.96	0.80553	0.621729
156	Isovalerylcarnitine (acyl-C5)	HMDB00688	Carnitine and fatty acid metabolism	246.17	246.17	1.77105	+	119447	85075.3	50593.6	86258.3	99352.6	117923	97265.2	70828.3	39415.9	454539	61917.5	121353	7272.31	63729.9	86098	76374.9	67581.9	8623.26	73446.2	0.117409		85666.8	98308.9	1.14757	0.54328
157	acyl-C5-OH	ac107	Carnitine and fatty acid metabolism	262.165	262.165	1.08649	+	78242.1	127032	7575.4	8736.25	62240	81157.4	9571.52	8402.71	6465.33	24574	6548.55	10725.6	9203.45	18073.6	25700.6	19256	18878.6	3045.8	20477.2	0.148741		43489.2	35905.8	0.825626	0.677299
158	Hexanoyl-L-carnitine (acyl-C6)	HMDB00756	Carnitine and fatty acid metabolism	258.179	258.179	2.22304	-	222431	153668	228244	178092	276915	173310	175478	218064	162838	75844.5	192174	159886	0	165024	161030	245987	167187	35391.5	184807	0.191505		200261	196771	0.982569	0.629511
159	L-Octanoylcarnitine (acyl-C8)	HMDB00791	Carnitine and fatty acid metabolism	286.203	286.203	2.07103	-	22956	29184.6	48125.5	34645.8	38400.4	51716.9	39352.1	42785.5	45659.7	0	13615	20807.2	0	24184.5	26975.4	47530.6	68511.3	17863.4	41800.5	0.42735		31915.2	41068.8	1.28681	0.180391
160	Octenoyl-L-carnitine (acyl-C8:1)	ac111	Carnitine and fatty acid metabolism	286.201	286.201	1.98581	+	14713.4	18868.8	18177.7	15431.2	12833.3	31953.5	18146.4	18832	12610.9	178820	13774.7	34067.8	3597.09	1081.88	15801.9	13563.5	13207.1	5762.81	10913.6	0.52804		16804.5	18489.2	1.10026	0.417959
161	O-Dodecenoyl-carnitine (acyl-C12:1)	HMDB13326	Carnitine and fatty acid metabolism	342.265	342.265	1.79642	+	58188.1	21257.1	17949.8	13797.2	11059.8	28831.6	10505.7	13209.3	4596.81	5503.26	9124.91	28289	672.428	39676.6	38340.2	27986.3	35727	4527.7	35432.5	0.127784		19603.5	12134.6	0.619002	0.326208
162	Hexanoic acid (caproate)	C01585	Saturated Fatty acids	115.075	115.075	1.87063	-	345417	338593	412775	367602	381608	404791	369434	443762	404862	55098.6	146711	186490	832.218	311405	357137	471315	461654	68141.1	400378	0.170192		356509	393199	1.10291	0.198863
163	Heptanoic acid	C17714	Saturated Fatty acids	129.091	129.091	1.97365	-	340408	387270	474191	358768	506755	394802	428759	459548	471793	67835.1	191341	198101	0	355445	334204	504597	481221	74879.9	418867	0.178768		373019	444153	1.1907	0.182125
164	Octanoic acid (caprylic acid)	C06423	Saturated Fatty acids	143.107	143.107	2.0762	-	377310	486093	635180	528214	560276	667667	565729	596156	600694	41463.9	272638	282954	0	407638	442088	663903	831296	172310	586231	0.293928		507153	580943	1.1455	0.173512
165	Nonanoic acid (pelargonic acid)	C01601	Saturated Fatty acids	157.122	157.122	2.15709	-	1414859	1225223	2165820	1520129	1673776	1486999	1508140	1775555	1696655	68670	834038	781345	538.923	1299300	1110309	1748320	1496055	236583	1413496	0.167374		1467494	1590958	1.08413	0.895171
166	Decanoic acid (capric acid)	C01571	Saturated Fatty acids	171.138	171.138	2.24438	-	354811	277563	446286	420208	487413	471554	503173	408973	337482	26896.5	154824	192606	0	294760	287931	489041	446893	89591.6	379656	0.235981		387510	479484	1.23735	0.0733967
167	Icosanoic acid (arachidic acid)	C06425	Saturated Fatty acids	311.296	311.296	3.07785	-	10149.9	14574.5	15640.6	20726.2	13854.5	23306.2	50387	13061.4	11821.8	3240.87	0	0	0	6421.66	14803.3	19643.4	8011.18	5317.79	12219.9	0.435175		15107.6	18580.3	1.22987	0.314104
168	Dodecanoic acid (lauric acid)	C02679	Saturated Fatty acids	199.17	199.17	2.44224	-	178376	194795	254975	236386	277021	249384	394171	328109	287770	29867.2	68099.5	130552	0	186468	166507	273868	276670	49902.3	225878	0.220926		215591	302565	1.40342	0.0388632
169	Tetradecanoic acid (myristic acid)	C06424	Saturated Fatty acids	227.201	227.201	2.71943	-	334096	517662	322441	267297	375767	536231	427031	264666	339690	64139.9	118678	161546	0	252599	271076	344817	296283	34625.5	291194	0.118909		328268	401399	1.22278	0.623423
170	Tridecanoic acid/Undecyl acetate	C17076	Saturated Fatty acids	215.2	215.2	1.79801	+	69463.2	71014.7	75796	67793.9	37109.8	69027.6	56675.1	60096.5	9338.03	0	2712.85	3914.15	0	31577	36721.4	51878.8	51556.2	8971.18	42933.3	0.208956		70239	58385.8	0.831245	0.0700155
171	Hexadecanoic acid (palmitic acid)	C00249	Saturated Fatty acids	255.233	255.233	3.12215	-	3531358	4338756	4206390	1333244	3479292	4759564	5448261	2158130	2077140	868001	761476	1163436	11349.5	2959591	3091449	2805610	2526893	210124	2.84589e+06	0.0738344		3868874	4119428	1.06476	0.56717
172	Octadecanoic acid (stearic acid)	C01530	Saturated Fatty acids	283.264	283.264	3.71695	-	2657004	4272402	2069368	1540644	3017672	3712887	6004930	1616883	1118853	449921	35480.6	589769	0	1636560	1923718	2829442	2099249	440443	2.12224e+06	0.207537		2363186	3.36528e+06	1.42404	0.415607
173	(9S,10S)-9,10-dihydroxyoctadecanoate	C15988	Saturated Fatty acids	315.254	315.254	3.12984	-	61643.1	64678.8	66425.4	29713.2	81020.7	97226	99260.8	42100.8	49650.3	5014.46	7296.22	13453	2101.59	54630.7	55079.7	41271.6	51384.1	5566.6	50591.5	0.11003		63161	89123.3	1.41105	0.176131
174	Undecanoic acid	C17715	Monounsaturated Fatty Acids	185.154	185.154	2.3321	-	35630.8	35400.7	58949.5	44998.7	53607.2	57182.3	59452.3	53681.8	39814.6	3979.61	14291.9	26524	0	34043.3	34003.8	50319.6	43444.7	6873.42	40452.8	0.169912		40314.7	55432.1	1.37498	0.0762413
175	(9Z)-Tetradecenoic acid (myristoleic acid)	C08322	Monounsaturated Fatty Acids	225.186	225.186	2.50052	-	8283.48	14870.4	12893	9971.85	9547.37	23548	16027.6	14792.4	11284	0	3813.22	8200.83	0	9710.32	9872.82	12743.4	13925.2	1820.88	11562.9	0.157476		11432.4	15410	1.34792	0.216658
176	(9Z)-Hexadecenoic acid (palmitoleic acid)	C08362	Monounsaturated Fatty Acids	253.217	253.217	2.79065	-	66485.9	128722	43160.9	45356.8	74588.9	117744	86081.5	46212.1	51786.6	26555.5	25223.4	27175.3	0	39305.5	53896.4	58109.4	60993.8	8341.58	53076.3	0.157162		55921.3	80335.2	1.43658	0.695047
177	(9Z)-Octadecenoic acid (oleic acid)	C00712	Monounsaturated Fatty Acids	281.249	281.249	3.1681	-	363255	705654	286655	227013	316804	531848	438404	179843	160121	258455	102678	132067	5998.3	230425	311664	212526	269446	38155.6	256015	0.149036		324955	377604	1.16202	0.833142
178	Dodecanedioic acid	C02678	Polyunsaturated Fatty Acids	229.144	229.144	1.86228	-	90898.9	81904.3	99851.6	90133	79400.6	117716	129243	92745.9	58045.9	63032.6	84266	35052.5	3018.15	81231.1	80379.2	100837	91760	8390.41	88551.7	0.0947515		90516	105231	1.16257	0.283649
179	Docosahexaenoic acid (4Z,7Z,10Z,13Z,16Z,19Z)	C06429	Polyunsaturated Fatty Acids	327.233	327.233	2.62901	-	124526	436595	18419.9	17226.6	69701.1	158618	28147.1	5583.36	0	3189.84	0	0	0	13574.2	11177.4	16146.7	11872.3	1915.53	13192.6	0.145197		71472.7	48924.1	0.684514	0.454386
180	Adrenic acid (7,10,13,16-Docosatetraenoic acid)	C16527	Essential fatty acids	331.265	331.265	3.02287	-	217313	357692	12874.8	8460.12	155936	186077	26458.2	8715.52	0	0	0	0	0	20919.7	16445.2	16052.7	11092.6	3479.26	16127.5	0.215734		115094	91196.9	0.79237	0.58901
181	Dihomo-gamma-linolenate ((8Z-11Z-14Z)-Icosatrienoic acid)	C03242	Essential fatty acids	305.249	305.249	2.92334	-	32555.4	105368	5753.98	3007.23	27743.4	43248.1	9924.81	3484.07	0	0	0	0	0	5152.59	4048.83	4733.12	1577	1385.61	3877.89	0.357309		19154.7	18834.1	0.983263	0.563656
182	Docosapentaenoic acid ((7Z,10Z,13Z,16Z,19Z)-Docosa-7,10,13,16,19-pentaenoic acid)	C16513	Essential fatty acids	329.249	329.249	2.76173	-	124690	345194	18282.4	11162.8	70764.8	146924	32187.1	10274.2	0	0	0	0	0	11485.8	19832.5	14375.4	13028.6	3145.25	14680.6	0.214246		71486	51475.9	0.720084	0.500791
183	Plasmenylcholine	C00958	Phospholipids	309.101	309.101	1.77199	-	47215.9	13652.7	38188.9	31491.9	40257.2	32687.5	53830.6	23165.1	743.462	2584.65	2979.13	4627.95	0	48499	38981	56007.5	55913.6	6975.72	49850.3	0.139933		34840.4	36472.4	1.04684	0.631901
184	9Z-Undecenoic acid	LMFA01030221	Bile acids	183.138	183.138	1.80592	-	8706.46	16387.5	1433.4	1229.75	3691.64	11165	3914.24	4776.17	1290.29	4336.95	1067.64	1937.01	0	4514.36	3028.39	4178.83	4101.22	557.443	3955.7	0.140921		5069.93	4345.2	0.857054	0.801808
185	Glycochenodeoxycholate	C05466	Bile acids	448.307	448.307	1.82876	-	4833.8	12256.2	4698.35	10418.3	5930.8	13333.7	9886.6	3621.19	0	0	0	0	0	4369.86	6986.04	7104.9	5890.12	1099.06	6087.73	0.180537		7626.03	7908.7	1.03707	0.962553
186	Linoleic acid ((9Z,12Z)-Octadecadienoic acid; Linoleate)	C01595	Linoleic Acid Metabolism	279.233	279.233	2.82589	-	91394.1	113754	43524.9	26779.7	92987.8	131391	72923.2	44834.2	32578.1	51775.7	16880.4	27240.4	552.123	37999.4	41807.1	52084.1	44461.9	5156.31	44088.1	0.116955		67459.5	82955.5	1.22971	0.563113		308.908	LA
187	13(S)-HODE	infllpd-04	Linoleic Acid Metabolism	295.228	295.228	2.41579	-	16646	17790.4	20291.7	17088.7	22174.2	26418.7	22452.5	22994.5	20020.6	19211.2	16176.4	16422.7	2392.01	16964.9	21502.3	21962.3	23635.7	2470.12	21016.3	0.117534		17439.5	22723.5	1.30299	0.00482579
188	9/13-OxoODE	infllpd-18	Linoleic Acid Metabolism	293.207	293.207	3.12629	-	23502.6	33380	23634.6	11289.5	17504.4	35271.9	37176.7	13599.8	8748.92	0	2624.09	3874.84	0	19412	23309	16508.7	16555.1	2779.81	18946.2	0.146721		23568.6	26388.2	1.11963	0.710403
189	Arachidonic acid (Eicosatetraenoic acid; (5Z,8Z,11Z,14Z)-Icosatetraenoic acid)	C00219	Arachidonate Metabolism	303.233	303.233	2.73077	-	1147602	2.10686e+06	72242	42927.3	736282	1344406	108624	22681.5	0	7966.52	0	0	0	67494.2	91989	46296	37396.6	21069.3	60794	0.346568		609922	422453	0.692634	0.636623		89.6508	ARA
190	Prostaglandin D2	C00696	Arachidonate Metabolism	351.221	351.221	3.12191	-	120331	164254	147116	73469.1	157002	187330	204616	106100	82750.1	0	33523	38641.2	965.213	107502	134502	134457	118776	11390.7	123809	0.0920023		133723	172166	1.28748	0.248064
191	Prostaglandin D3 (isobars)	C13802	Arachidonate Metabolism	349.204	349.204	1.95907	-	12928.7	16721	13310.2	15114.6	11282.6	22178.2	31584.4	12241.2	10966.9	25893.4	3549.76	16042.9	0	17885.8	13529.8	16327.5	13387.4	1906.09	15282.6	0.124723		14212.4	17209.7	1.21089	0.360438
192	5(S)/8/9/11/12(S)/15(S)/20-HETE	infllpd-06	Arachidonate Metabolism	319.231	319.231	1.98405	-	3507.87	6431.27	4216.85	3624.77	5723.86	3930.53	4145.04	5373.97	3566.4	0	4400.44	5853.02	823.707	6401.61	4904.1	5594.7	4435.9	741.479	5334.08	0.139008		3920.81	4759.5	1.21391	0.683132
193	5-6-Epoxytetraene	C14815	Sterols	333.21	333.211	1.84221	-	16538.6	22698.3	17944.1	18928.1	18557.2	19542.8	23526.7	15649.2	22662	16094.2	14256.5	19168	0	22441.1	17343.7	23385.3	21667.3	2313.28	21209.3	0.109069		18436.1	19050	1.0333	0.893805
194	Pregnenolone carbonitrile	C15637	Xenobiotics	342.242	342.242	1.7918	+	34769.9	179741	2621.87	5827.96	30496.1	90520.6	6188.31	2094.36	4472.66	9668.68	3138.02	41069.8	0	19480.8	25926.4	19551.2	24327.8	2862.01	22321.6	0.128217		20298.9	18342.2	0.903604	0.633603
195	N5-Methyl-L-glutamine	C03153	Other	161.092	161.092	1.72898	+	1176.49	4032.43	5278.15	5254.15	4727.59	3921.73	5479.45	3101.33	4861.21	6839.15	6121.23	6427.38	319.663	5289.29	5085.46	3973.89	5829.6	675.311	5044.56	0.133869		4643.29	4324.66	0.931379	0.744886
196	2-Deoxy-alpha-D-glucoside	C03573	Other	164.067	164.067	0.59318	+	186362	238967	141948	124339	86336.7	154546	134474	129875	34622.6	2925.22	35166.4	598.641	4017.18	157152	140902	177931	157784	13129.9	158442	0.0828689		164155	132175	0.805183	0.163472
197	N-Acyl-D-mannosaminolactone	C03792	Other	205.06	205.06	1.93636	+	379680	623675	513729	464397	478669	469704	519171	502671	456900	44434.8	206991	141820	357.189	381531	419962	620475	524473	93323.1	486610	0.191782		489063	490670	1.00329	0.958706
198	N6-Methyl-L-lysine	C02728	Other	161.129	161.129	0.626365	+	25882	63429.8	14340.1	19132.6	23521.7	44837.5	18668.4	17089.7	3982.99	13541.1	13565.4	10391.4	18895.6	21848	25858.9	29823.3	33834.8	4463.76	27841.2	0.160329		22507.3	21095.1	0.937254	0.72948
199	Diallyl sulfide	C08370	Other	115.059	115.059	0.586876	+	32009.6	58615.9	11905.3	29108.9	24124.8	23517.9	21818	18806.5	4063.95	2909.47	4151.01	2392.11	719.279	16080	16516.6	18340.2	28993.4	5271.03	19982.6	0.263782		30559.3	22667.9	0.74177	0.307395
200	D-glucono-1,5-lactone	C00198	Other	177.04	177.04	0.681994	-	12400.5	19739.5	23290.5	21443.4	14851.1	24838.2	28002.3	35762.9	9903.08	5796.39	5065.62	4342.78	3496.87	32365.6	22304.7	26755.6	18215.5	5258.24	24910.3	0.211087		20591.5	26420.2	1.28307	0.22742
201	Catechin	C17590	Other	289.068	289.068	0.920569	-	8729.09	19332.9	2699.66	5207.91	8204.31	15774.6	4664.85	5544.91	888.722	827.092	683.954	383.151	361.442	9312.72	7761.44	8077.44	11260.9	1374.05	9103.12	0.150943		6968.5	6874.61	0.986526	0.923519
202	Pyridoxamine	C00534	Other	169.096	169.096	0.636665	+	94229.2	163680	136103	160377	110682	224513	134376	149692	8908.97	9743.16	10210.6	6604.92	7429.94	191488	243614	237726	227456	20233.1	225071	0.0898963		148240	142034	0.958134	0.60035
203	9-Oxononanoic acid	C16322	Other	171.102	171.102	1.84597	-	990215	1050061	1050363	1107478	952417	991665	1300469	915791	1305544	1020812	655100	902411	4259.05	1000898	1040614	1284202	1089579	108775	1.10382e+06	0.0985443		1050212	972041	0.925566	0.921036
204	N-Amidino-L-aspartate	C03139	Other	176.066	176.066	1.00951	+	76988.4	108174	55901.7	78234.6	51588.1	76711.9	92844.4	44648.3	733.63	0	906.8	0	0	51426.4	62154	46372	58640.7	6147.22	54648.3	0.112487		77611.5	64150	0.826553	0.421419
205	L-Noradrenaline	C00547	Other	170.081	170.081	0.892675	+	1114070	1492744	1269676	2384590	1082396	1706697	1808576	1891414	12201	22093.9	16617.9	9747.36	6656.54	2436236	2611041	2737394	1973635	289486	2.43958e+06	0.118662		1381210	1.75764e+06	1.27253	0.871727
206	6-Carboxyhexanoate	C02656	Other	161.08	161.08	1.26029	+	5421.26	6398.3	9030.88	10971.6	4876.17	7028.63	24901.8	15916	5085.76	12719.4	9843.62	10427.4	2863.68	5376.63	4690.08	5469.82	4237.99	506.599	4943.63	0.102475		7714.59	11472.3	1.4871	0.313509
207	N-Acetylmethionine	C02712	Other	192.069	192.069	1.77517	+	74044.8	343139	7925.75	6748.7	98792	198252	14299	13223	0	0	0	0	0	42294.4	56951.6	63663	65674.8	9162.68	57146	0.160338		40985.3	56545.5	1.37965	0.77859
208	10-Hydroxydecanoic acid	C02774	Other	187.133	187.133	1.85014	-	92932.2	107413	81519.6	96520.7	85367.7	90747.1	112301	79536.9	115704	534289	93998.1	86296.7	2070.12	93986.8	90166	116491	101841	10083	100621	0.100207		94726.5	88057.4	0.929597	0.779828
209	Protein 5-hydroxylysine	C03429	Other	188.103	188.103	0.694397	+	3851.29	2884.11	2177.03	7867.04	2304.95	4394.43	7672.37	9717.89	4206.32	3162.97	4346.59	3891.53	1630.37	12879.8	10020.9	12835	12512.7	1186.95	12062.1	0.0984036		3367.7	6033.4	1.79155	0.414774
210	1-Methoxyphenanthrene	C11433	Other	209.098	209.098	0.573682	+	7876.11	7373.81	3425.66	2826.84	4364.41	6841.39	2709.12	2331.6	0	0	0	0	0	13719.8	28394.7	32093.9	34460.3	8059.18	27167.2	0.296651		5399.74	3536.77	0.654989	0.459522
211	Taxifolin	C01617	Other	303.05	303.05	1.01608	-	13201.5	23973.5	2123.65	1209.37	9309.65	9158.05	1266.12	825.038	0	349.62	0	0	0	3705.78	4566.76	5527.56	4268.33	660.234	4517.11	0.146163		7662.56	5212.08	0.680201	0.427296
212	D-Mannonate	C00514	Other	195.051	195.051	0.63709	-	29701.5	40716.3	30013.7	37062.9	35228.3	50965.1	32622.2	28457.7	6942.71	8049.62	3696.28	7140.46	2518.57	39562.6	37333.1	48289.2	48510.3	5038.63	43423.8	0.116034		33538.3	33925.3	1.01154	0.678554
213	alpha-Ribazole	C05775	Other	279.132	279.132	2.09684	+	2937.51	5154.08	7167.84	5356.89	7060.58	9415.67	9701.8	8781.57	3351.08	3689.23	761.523	2823.15	2368.58	2093.18	2303.93	2054.1	2570.75	205.327	2255.49	0.0910342		5255.48	9098.62	1.73126	0.014192
214	3-Methoxy-4-hydroxyphenylacetaldehyde	C05581	Other	165.055	165.055	2.0056	-	347307	128444	103524	117461	77602.1	151642	119238	90173	49144.2	6235.4	32687.9	35728	807.594	101795	98920.7	116437	115985	7993.22	108284	0.0738168		122952	104705	0.851594	0.325272
215	Robustine	C10736	Other: Anti-Inflammatory	216.063	216.063	1.82837	+	10635.4	17467	3297.16	10072.6	11599.2	20174	10224.5	10799.9	0	0	0	0	0	12464.9	15901.3	9416.17	10077.6	2539.85	11965	0.212273		10354	11199.5	1.08166	0.475809
							Min	0
							Maz	92700000
